# Supplementary material for: Increasing cancer risk over calendar year in people with multiple sclerosis: a case–control study
Source: Springer Nature journal article supplement (doi:10.1007/s00415-020-10170-5), 2020-10-21
Supplement: MOESM1 [file 18508044]

**Supplementary Table 1** List of read codes related to cancers of interest

| <b>Medcode</b> | <b>Readcode</b> | <b>Description</b>                                           | <b>Cancer type</b> |
|----------------|-----------------|--------------------------------------------------------------|--------------------|
| 2462           | B61..00         | Hodgkin's disease                                            | Hodgkin lymphoma   |
| 104291         | B61..11         | Hodgkin lymphoma                                             | Hodgkin lymphoma   |
| 65489          | B610.00         | Hodgkin's paraganuloma                                       | Hodgkin lymphoma   |
| 100423         | B610100         | Hodgkin's paraganuloma of lymph nodes of head, face, neck    | Hodgkin lymphoma   |
| 98840          | B610300         | Hodgkin's paraganuloma of intra-abdominal lymph nodes        | Hodgkin lymphoma   |
| 44196          | B611.00         | Hodgkin's granuloma                                          | Hodgkin lymphoma   |
| 98909          | B611100         | Hodgkin's granuloma of lymph nodes of head, face and neck    | Hodgkin lymphoma   |
| 64036          | B612.00         | Hodgkin's sarcoma                                            | Hodgkin lymphoma   |
| 68039          | B612400         | Hodgkin's sarcoma of lymph nodes of axilla and upper limb    | Hodgkin lymphoma   |
| 38939          | B613.00         | Hodgkin's disease, lymphocytic-histiocytic predominance      | Hodgkin lymphoma   |
| 71142          | B613000         | Hodgkin's, lymphocytic-histiocytic predominance unspec site  | Hodgkin lymphoma   |
| 68330          | B613100         | Hodgkin's, lymphocytic-histiocytic pred of head, face, neck  | Hodgkin lymphoma   |
| 92245          | B613200         | Hodgkin's, lymphocytic-histiocytic pred intrathoracic nodes  | Hodgkin lymphoma   |
| 73532          | B613300         | Hodgkin's, lymphocytic-histiocytic pred intra-abdominal node | Hodgkin lymphoma   |
| 93951          | B613500         | Hodgkin's, lymphocytic-histiocytic pred inguinal and leg     | Hodgkin lymphoma   |
| 95338          | B613600         | Hodgkin's, lymphocytic-histiocytic pred intrapelvic nodes    | Hodgkin lymphoma   |
| 106911         | B613700         | Hodgkin's, lymphocytic-histiocytic predominance of spleen    | Hodgkin lymphoma   |
| 104743         | B613800         | Hodgkin's, lymphocytic-histiocytic pred of multiple sites    | Hodgkin lymphoma   |
| 29876          | B613z00         | Hodgkin's, lymphocytic-histiocytic predominance NOS          | Hodgkin lymphoma   |
| 29178          | B614.00         | Hodgkin's disease, nodular sclerosis                         | Hodgkin lymphoma   |
| 57225          | B614000         | Hodgkin's disease, nodular sclerosis of unspecified site     | Hodgkin lymphoma   |
| 55303          | B614100         | Hodgkin's nodular sclerosis of head, face and neck           | Hodgkin lymphoma   |
| 67506          | B614200         | Hodgkin's nodular sclerosis of intrathoracic lymph nodes     | Hodgkin lymphoma   |
| 61149          | B614300         | Hodgkin's nodular sclerosis of intra-abdominal lymph nodes   | Hodgkin lymphoma   |
| 65483          | B614400         | Hodgkin's nodular sclerosis of lymph nodes of axilla and arm | Hodgkin lymphoma   |
| 105472         | B614700         | Hodgkin's disease, nodular sclerosis of spleen               | Hodgkin lymphoma   |
| 19140          | B614800         | Hodgkin's nodular sclerosis of lymph nodes of multiple sites | Hodgkin lymphoma   |
| 63054          | B614z00         | Hodgkin's disease, nodular sclerosis NOS                     | Hodgkin lymphoma   |
| 49605          | B615.00         | Hodgkin's disease, mixed cellularity                         | Hodgkin lymphoma   |
| 97863          | B615000         | Hodgkin's disease, mixed cellularity of unspecified site     | Hodgkin lymphoma   |
| 94407          | B615100         | Hodgkin's mixed cellularity of lymph nodes head, face, neck  | Hodgkin lymphoma   |
| 58684          | B615200         | Hodgkin's mixed cellularity of intrathoracic lymph nodes     | Hodgkin lymphoma   |
| 108886         | B615500         | Hodgkin's mixed cellularity of lymph nodes inguinal and leg  | Hodgkin lymphoma   |
| 94005          | B615z00         | Hodgkin's disease, mixed cellularity NOS                     | Hodgkin lymphoma   |
| 67703          | B616.00         | Hodgkin's disease, lymphocytic depletion                     | Hodgkin lymphoma   |
| 95049          | B616000         | Hodgkin's lymphocytic depletion of unspecified site          | Hodgkin lymphoma   |
| 63625          | B616400         | Hodgkin's lymphocytic depletion lymph nodes axilla and arm   | Hodgkin lymphoma   |
| 110563         | B616500         | Hodgkin's lymphocytic depletion lymph nodes inguinal and leg | Hodgkin lymphoma   |
| 101715         | B616700         | Hodgkin's disease, lymphocytic depletion of spleen           | Hodgkin lymphoma   |
| 107032         | B616800         | Hodgkin's lymphocytic depletion lymph nodes multiple sites   | Hodgkin lymphoma   |
| 101530         | B616z00         | Hodgkin's disease, lymphocytic depletion NOS                 | Hodgkin lymphoma   |
| 104895         | B617.00         | Nodular lymphocyte predominant Hodgkin lymphoma              | Hodgkin lymphoma   |
| 105841         | B618.00         | Nodular sclerosis classical Hodgkin lymphoma                 | Hodgkin lymphoma   |

| <b>Medcode</b> | <b>Readcode</b> | <b>Description</b>                                           | <b>Cancer type</b>   |
|----------------|-----------------|--------------------------------------------------------------|----------------------|
| 108775         | B619.00         | Mixed cellularity classical Hodgkin lymphoma                 | Hodgkin lymphoma     |
| 106597         | B61B.00         | Lymphocyte-rich classical Hodgkin lymphoma                   | Hodgkin lymphoma     |
| 104484         | B61C.00         | Other classical Hodgkin lymphoma                             | Hodgkin lymphoma     |
| 53397          | B61z.00         | Hodgkin's disease NOS                                        | Hodgkin lymphoma     |
| 106349         | B61z.11         | Hodgkin lymphoma NOS                                         | Hodgkin lymphoma     |
| 61662          | B61z000         | Hodgkin's disease NOS, unspecified site                      | Hodgkin lymphoma     |
| 59778          | B61z100         | Hodgkin's disease NOS of lymph nodes of head, face and neck  | Hodgkin lymphoma     |
| 59755          | B61z200         | Hodgkin's disease NOS of intrathoracic lymph nodes           | Hodgkin lymphoma     |
| 107804         | B61z300         | Hodgkin's disease NOS of intra-abdominal lymph nodes         | Hodgkin lymphoma     |
| 91900          | B61z400         | Hodgkin's disease NOS of lymph nodes of axilla and arm       | Hodgkin lymphoma     |
| 99012          | B61z500         | Hodgkin's disease NOS of lymph nodes inguinal region and leg | Hodgkin lymphoma     |
| 94279          | B61z700         | Hodgkin's disease NOS of spleen                              | Hodgkin lymphoma     |
| 97746          | B61z800         | Hodgkin's disease NOS of lymph nodes of multiple sites       | Hodgkin lymphoma     |
| 42461          | B61zz00         | Hodgkin's disease NOS                                        | Hodgkin lymphoma     |
| 43415          | ByuD000         | [X]Other Hodgkin's disease                                   | Hodgkin lymphoma     |
| 41369          | B60..00         | Lymphosarcoma and reticulosarcoma                            | Non Hodgkin lymphoma |
| 1481           | B600.00         | Reticulosarcoma                                              | Non Hodgkin lymphoma |
| 60242          | B600000         | Reticulosarcoma of unspecified site                          | Non Hodgkin lymphoma |
| 71031          | B600100         | Reticulosarcoma of lymph nodes of head, face and neck        | Non Hodgkin lymphoma |
| 70374          | B600300         | Reticulosarcoma of intra-abdominal lymph nodes               | Non Hodgkin lymphoma |
| 95058          | B600700         | Reticulosarcoma of spleen                                    | Non Hodgkin lymphoma |
| 99240          | B600z00         | Reticulosarcoma NOS                                          | Non Hodgkin lymphoma |
| 27416          | B601.00         | Lymphosarcoma                                                | Non Hodgkin lymphoma |
| 71625          | B601000         | Lymphosarcoma of unspecified site                            | Non Hodgkin lymphoma |
| 71238          | B601100         | Lymphosarcoma of lymph nodes of head, face and neck          | Non Hodgkin lymphoma |
| 62380          | B601200         | Lymphosarcoma of intrathoracic lymph nodes                   | Non Hodgkin lymphoma |
| 64670          | B601300         | Lymphosarcoma of intra-abdominal lymph nodes                 | Non Hodgkin lymphoma |
| 100352         | B601500         | Lymphosarcoma of lymph nodes of inguinal region and leg      | Non Hodgkin lymphoma |
| 103245         | B601700         | Lymphosarcoma of spleen                                      | Non Hodgkin lymphoma |
| 104790         | B601800         | Lymphosarcoma of lymph nodes of multiple sites               | Non Hodgkin lymphoma |
| 63723          | B601z00         | Lymphosarcoma NOS                                            | Non Hodgkin lymphoma |
| 21402          | B602.00         | Burkitt's lymphoma                                           | Non Hodgkin lymphoma |
| 59115          | B602100         | Burkitt's lymphoma of lymph nodes of head, face and neck     | Non Hodgkin lymphoma |
| 100006         | B602200         | Burkitt's lymphoma of intrathoracic lymph nodes              | Non Hodgkin lymphoma |
| 97577          | B602300         | Burkitt's lymphoma of intra-abdominal lymph nodes            | Non Hodgkin lymphoma |

| <b>Medcode</b> | <b>Readcode</b> | <b>Description</b>                                           | <b>Cancer type</b>   |
|----------------|-----------------|--------------------------------------------------------------|----------------------|
| 92380          | B602500         | Burkitt's lymphoma of lymph nodes of inguinal region and leg | Non Hodgkin lymphoma |
| 71304          | B602z00         | Burkitt's lymphoma NOS                                       | Non Hodgkin lymphoma |
| 99887          | B60y.00         | Other specified reticulosarcoma or lymphosarcoma             | Non Hodgkin lymphoma |
| 99951          | B60z.00         | Reticulosarcoma or lymphosarcoma NOS                         | Non Hodgkin lymphoma |
| 33333          | B62..00         | Other malignant neoplasm of lymphoid and histiocytic tissue  | Non Hodgkin lymphoma |
| 5179           | B620.00         | Nodular lymphoma (Brill-Symmers disease)                     | Non Hodgkin lymphoma |
| 66327          | B620000         | Nodular lymphoma of unspecified site                         | Non Hodgkin lymphoma |
| 45264          | B620100         | Nodular lymphoma of lymph nodes of head, face and neck       | Non Hodgkin lymphoma |
| 105203         | B620200         | Nodular lymphoma of intrathoracic lymph nodes                | Non Hodgkin lymphoma |
| 92068          | B620300         | Nodular lymphoma of intra-abdominal lymph nodes              | Non Hodgkin lymphoma |
| 94995          | B620500         | Nodular lymphoma of lymph nodes of inguinal region and leg   | Non Hodgkin lymphoma |
| 58082          | B620800         | Nodular lymphoma of lymph nodes of multiple sites            | Non Hodgkin lymphoma |
| 65701          | B620z00         | Nodular lymphoma NOS                                         | Non Hodgkin lymphoma |
| 12006          | B621.00         | Mycosis fungoides                                            | Non Hodgkin lymphoma |
| 95949          | B621000         | Mycosis fungoides of unspecified site                        | Non Hodgkin lymphoma |
| 91674          | B621300         | Mycosis fungoides of intra-abdominal lymph nodes             | Non Hodgkin lymphoma |
| 96379          | B621400         | Mycosis fungoides of lymph nodes of axilla and upper limb    | Non Hodgkin lymphoma |
| 72714          | B621500         | Mycosis fungoides of lymph nodes of inguinal region and leg  | Non Hodgkin lymphoma |
| 95012          | B621800         | Mycosis fungoides of lymph nodes of multiple sites           | Non Hodgkin lymphoma |
| 38005          | B621z00         | Mycosis fungoides NOS                                        | Non Hodgkin lymphoma |
| 35014          | B622.00         | Sezary's disease                                             | Non Hodgkin lymphoma |
| 100532         | B622z00         | Sezary's disease NOS                                         | Non Hodgkin lymphoma |
| 44267          | B623.00         | Malignant histiocytosis                                      | Non Hodgkin lymphoma |
| 69497          | B623000         | Malignant histiocytosis of unspecified site                  | Non Hodgkin lymphoma |
| 94415          | B623100         | Malignant histiocytosis of lymph nodes head, face and neck   | Non Hodgkin lymphoma |
| 65642          | B623300         | Malignant histiocytosis of intra-abdominal lymph nodes       | Non Hodgkin lymphoma |
| 58871          | B623z00         | Malignant histiocytosis NOS                                  | Non Hodgkin lymphoma |
| 27330          | B624.00         | Leukaemic reticuloendotheliosis                              | Non Hodgkin lymphoma |
| 5137           | B624.11         | Leukaemic reticuloendotheliosis                              | Non Hodgkin lymphoma |
| 65122          | B624000         | Leukaemic reticuloendotheliosis of unspecified sites         | Non Hodgkin lymphoma |

| <b>Medcode</b> | <b>Readcode</b> | <b>Description</b>                                          | <b>Cancer type</b>   |
|----------------|-----------------|-------------------------------------------------------------|----------------------|
| 65123          | B624300         | Leukaemic reticuloend of intra-abdominal lymph nodes        | Non Hodgkin lymphoma |
| 73777          | B624z00         | Leukaemic reticuloendotheliosis NOS                         | Non Hodgkin lymphoma |
| 34926          | B625.00         | Letterer-Siwe disease                                       | Non Hodgkin lymphoma |
| 4870           | B625.11         | Histiocytosis X (acute, progressive)                        | Non Hodgkin lymphoma |
| 102715         | B625000         | Letterer-Siwe disease of unspecified sites                  | Non Hodgkin lymphoma |
| 102158         | B625200         | Letterer-Siwe disease of intrathoracic lymph nodes          | Non Hodgkin lymphoma |
| 54083          | B625800         | Letterer-Siwe disease of lymph nodes of multiple sites      | Non Hodgkin lymphoma |
| 47204          | B625z00         | Letterer-Siwe disease NOS                                   | Non Hodgkin lymphoma |
| 15036          | B626.00         | Malignant mast cell tumours                                 | Non Hodgkin lymphoma |
| 103900         | B626000         | Mast cell malignancy of unspecified site                    | Non Hodgkin lymphoma |
| 100615         | B626500         | Mast cell malignancy of lymph nodes inguinal region and leg | Non Hodgkin lymphoma |
| 31324          | B626800         | Mast cell malignancy of lymph nodes of multiple sites       | Non Hodgkin lymphoma |
| 89657          | B626z00         | Malignant mast cell tumour NOS                              | Non Hodgkin lymphoma |
| 3604           | B627.00         | Non-Hodgkin's lymphoma                                      | Non Hodgkin lymphoma |
| 104391         | B627.11         | Non-Hodgkin lymphoma                                        | Non Hodgkin lymphoma |
| 28639          | B627000         | Follicular non-Hodgkin's small cleaved cell lymphoma        | Non Hodgkin lymphoma |
| 70842          | B627100         | Follicular non-Hodg mixed sml cleavd & lge cell lymphoma    | Non Hodgkin lymphoma |
| 49262          | B627200         | Follicular non-Hodgkin's large cell lymphoma                | Non Hodgkin lymphoma |
| 50668          | B627300         | Diffuse non-Hodgkin's small cell (diffuse) lymphoma         | Non Hodgkin lymphoma |
| 108182         | B627400         | Diffuse non-Hodgkin's small cleaved cell (diffuse) lymphoma | Non Hodgkin lymphoma |
| 50695          | B627500         | Diffuse non-Hodgkin mixed sml & lge cell (diffuse) lymphoma | Non Hodgkin lymphoma |
| 53551          | B627600         | Diffuse non-Hodgkin's immunoblastic (diffuse) lymphoma      | Non Hodgkin lymphoma |
| 17460          | B627700         | Diffuse non-Hodgkin's lymphoblastic (diffuse) lymphoma      | Non Hodgkin lymphoma |
| 65180          | B627800         | Diffuse non-Hodgkin's lymphoma undifferentiated (diffuse)   | Non Hodgkin lymphoma |
| 95715          | B627900         | Mucosa-associated lymphoma                                  | Non Hodgkin lymphoma |
| 95545          | B627911         | Maltoma                                                     | Non Hodgkin lymphoma |
| 101114         | B627A00         | Diffuse non-Hodgkin's large cell lymphoma                   | Non Hodgkin lymphoma |
| 31576          | B627B00         | Other types of follicular non-Hodgkin's lymphoma            | Non Hodgkin lymphoma |
| 21549          | B627C00         | Follicular non-Hodgkin's lymphoma                           | Non Hodgkin lymphoma |
| 17182          | B627C11         | Follicular lymphoma NOS                                     | Non Hodgkin lymphoma |

| <b>Medcode</b> | <b>Readcode</b> | <b>Description</b>                                           | <b>Cancer type</b>   |
|----------------|-----------------|--------------------------------------------------------------|----------------------|
| 70509          | B627D00         | Diffuse non-Hodgkin's centroblastic lymphoma                 | Non Hodgkin lymphoma |
| 102594         | B627E00         | Diffuse large B-cell lymphoma                                | Non Hodgkin lymphoma |
| 105966         | B627F00         | Extranod marg zone B-cell lymphom mucosa-assoc lymphoid tiss | Non Hodgkin lymphoma |
| 105038         | B627G00         | Mediastinal (thymic) large B-cell lymphoma                   | Non Hodgkin lymphoma |
| 31794          | B627W00         | Unspecified B-cell non-Hodgkin's lymphoma                    | Non Hodgkin lymphoma |
| 39798          | B627X00         | Diffuse non-Hodgkin's lymphoma, unspecified                  | Non Hodgkin lymphoma |
| 104152         | B628.00         | Follicular lymphoma                                          | Non Hodgkin lymphoma |
| 105889         | B628000         | Follicular lymphoma grade 1                                  | Non Hodgkin lymphoma |
| 105095         | B628100         | Follicular lymphoma grade 2                                  | Non Hodgkin lymphoma |
| 107166         | B628200         | Follicular lymphoma grade 3                                  | Non Hodgkin lymphoma |
| 105020         | B628300         | Follicular lymphoma grade 3a                                 | Non Hodgkin lymphoma |
| 107973         | B628400         | Follicular lymphoma grade 3b                                 | Non Hodgkin lymphoma |
| 106969         | B628500         | Diffuse follicle centre lymphoma                             | Non Hodgkin lymphoma |
| 108719         | B628600         | Cutaneous follicle centre lymphoma                           | Non Hodgkin lymphoma |
| 106063         | B628700         | Other types of follicular lymphoma                           | Non Hodgkin lymphoma |
| 105792         | B629.00         | Multifocal multisystemic dissem Langerhans-cell histiocytosi | Non Hodgkin lymphoma |
| 105335         | B62A.00         | Sarcoma of dendritic cells                                   | Non Hodgkin lymphoma |
| 110191         | B62B.00         | Multifocal and unisystemic Langerhans-cell histiocytosis     | Non Hodgkin lymphoma |
| 105762         | B62C.00         | Unifocal Langerhans-cell histiocytosis                       | Non Hodgkin lymphoma |
| 105083         | B62D.00         | Histiocytic sarcoma                                          | Non Hodgkin lymphoma |
| 105085         | B62E.00         | T/NK-cell lymphoma                                           | Non Hodgkin lymphoma |
| 105559         | B62E100         | Anaplastic large cell lymphoma, ALK-positive                 | Non Hodgkin lymphoma |
| 105955         | B62E200         | Anaplastic large cell lymphoma, ALK-negative                 | Non Hodgkin lymphoma |
| 104862         | B62E300         | Cutaneous T-cell lymphoma                                    | Non Hodgkin lymphoma |
| 109780         | B62E400         | Extranodal NK/T-cell lymphoma, nasal type                    | Non Hodgkin lymphoma |
| 107949         | B62E500         | Hepatosplenic T-cell lymphoma                                | Non Hodgkin lymphoma |
| 105709         | B62E600         | Enteropathy-associated T-cell lymphoma                       | Non Hodgkin lymphoma |
| 105925         | B62E700         | Subcutaneous panniculitic T-cell lymphoma                    | Non Hodgkin lymphoma |
| 105375         | B62E800         | Blastic NK-cell lymphoma                                     | Non Hodgkin lymphoma |
| 105636         | B62E900         | Angioimmunoblastic T-cell lymphoma                           | Non Hodgkin lymphoma |

| <b>Medcode</b> | <b>Readcode</b> | <b>Description</b>                                           | <b>Cancer type</b>   |
|----------------|-----------------|--------------------------------------------------------------|----------------------|
| 105286         | B62EA00         | Primary cutaneous CD30-positive T-cell proliferations        | Non Hodgkin lymphoma |
| 104934         | B62Ew00         | Other mature T/NK-cell lymphoma                              | Non Hodgkin lymphoma |
| 106884         | B62F.00         | Nonfollicular lymphoma                                       | Non Hodgkin lymphoma |
| 106867         | B62F.11         | Non-follicular lymphoma                                      | Non Hodgkin lymphoma |
| 104386         | B62F000         | Small cell B-cell lymphoma                                   | Non Hodgkin lymphoma |
| 104620         | B62F100         | Mantle cell lymphoma                                         | Non Hodgkin lymphoma |
| 104412         | B62F200         | Lymphoblastic (diffuse) lymphoma                             | Non Hodgkin lymphoma |
| 17887          | B62x.00         | Malignant lymphoma otherwise specified                       | Non Hodgkin lymphoma |
| 90201          | B62x000         | T-zone lymphoma                                              | Non Hodgkin lymphoma |
| 57737          | B62x100         | Lymphoepithelioid lymphoma                                   | Non Hodgkin lymphoma |
| 12464          | B62x200         | Peripheral T-cell lymphoma                                   | Non Hodgkin lymphoma |
| 62437          | B62x400         | Malignant reticulosis                                        | Non Hodgkin lymphoma |
| 58962          | B62x500         | Malignant immunoproliferative small intestinal disease       | Non Hodgkin lymphoma |
| 95630          | B62x600         | True histiocytic lymphoma                                    | Non Hodgkin lymphoma |
| 44318          | B62xX00         | Oth and unspecif peripheral & cutaneous T-cell lymphomas     | Non Hodgkin lymphoma |
| 12335          | B62y.00         | Malignant lymphoma NOS                                       | Non Hodgkin lymphoma |
| 57427          | B62y000         | Malignant lymphoma NOS of unspecified site                   | Non Hodgkin lymphoma |
| 50696          | B62y100         | Malignant lymphoma NOS of lymph nodes of head, face and neck | Non Hodgkin lymphoma |
| 72725          | B62y200         | Malignant lymphoma NOS of intrathoracic lymph nodes          | Non Hodgkin lymphoma |
| 42579          | B62y300         | Malignant lymphoma NOS of intra-abdominal lymph nodes        | Non Hodgkin lymphoma |
| 34089          | B62y400         | Malignant lymphoma NOS of lymph nodes of axilla and arm      | Non Hodgkin lymphoma |
| 63105          | B62y500         | Malignant lymphoma NOS of lymph node inguinal region and leg | Non Hodgkin lymphoma |
| 71262          | B62y600         | Malignant lymphoma NOS of intrapelvic lymph nodes            | Non Hodgkin lymphoma |
| 60092          | B62y700         | Malignant lymphoma NOS of spleen                             | Non Hodgkin lymphoma |
| 15504          | B62y800         | Malignant lymphoma NOS of lymph nodes of multiple sites      | Non Hodgkin lymphoma |
| 15027          | B62yz00         | Malignant lymphoma NOS                                       | Non Hodgkin lymphoma |
| 65434          | B62z.00         | Malignant neoplasms of lymphoid and histiocytic tissue NOS   | Non Hodgkin lymphoma |
| 108037         | B62z000         | Unspec malig neop lymphoid/histiocytic of unspecified site   | Non Hodgkin lymphoma |
| 64427          | B62z100         | Unspec malig neop lymphoid/histiocytic lymph node head/neck  | Non Hodgkin lymphoma |
| 93384          | B62z200         | Unspec malig neop lymphoid/histiocytic of intrathoracic node | Non Hodgkin lymphoma |

| <b>Medcode</b> | <b>Readcode</b> | <b>Description</b>                                           | <b>Cancer type</b>   |
|----------------|-----------------|--------------------------------------------------------------|----------------------|
| 103353         | B62z300         | Unspec malig neop lymphoid/histiocytic intra-abdominal nodes | Non Hodgkin lymphoma |
| 107638         | B62z400         | Unspec malig neop lymphoid/histiocytic lymph node axilla/arm | Non Hodgkin lymphoma |
| 71609          | B62z500         | Unspec malig neop lymphoid/histiocytic nodes inguinal/leg    | Non Hodgkin lymphoma |
| 109342         | B62z600         | Unspec malig neop lymphoid/histiocytic of intrapelvic nodes  | Non Hodgkin lymphoma |
| 101465         | B62z800         | Unspec malig neop lymphoid/histiocytic of multiple sites     | Non Hodgkin lymphoma |
| 95792          | B62zz00         | Lymphoid and histiocytic malignancy NOS                      | Non Hodgkin lymphoma |
| 70716          | B62zz11         | Immunoproliferative neoplasm                                 | Non Hodgkin lymphoma |
| 67518          | ByuD100         | [X]Other types of follicular non-Hodgkin's lymphoma          | Non Hodgkin lymphoma |
| 98596          | ByuD200         | [X]Other types of diffuse non-Hodgkin's lymphoma             | Non Hodgkin lymphoma |
| 64336          | ByuD300         | [X]Other specified types of non-Hodgkin's lymphoma           | Non Hodgkin lymphoma |
| 64515          | ByuDC00         | [X]Diffuse non-Hodgkin's lymphoma, unspecified               | Non Hodgkin lymphoma |
| 109714         | ByuDD00         | [X]Oth and unspecif peripheral & cutaneous T-cell lymphomas  | Non Hodgkin lymphoma |
| 63375          | ByuDE00         | [X]Unspecified B-cell non-Hodgkin's lymphoma                 | Non Hodgkin lymphoma |
| 8649           | ByuDF00         | [X]Non-Hodgkin's lymphoma, unspecified type                  | Non Hodgkin lymphoma |
| 7940           | ByuDF11         | [X]Non-Hodgkin's lymphoma NOS                                | Non Hodgkin lymphoma |
| 87335          | B624.12         | Hairy cell leukaemia                                         | Leukaemia            |
| 37182          | B63..00         | Multiple myeloma and immunoproliferative neoplasms           | Leukaemia            |
| 4944           | B630.00         | Multiple myeloma                                             | Leukaemia            |
| 43552          | B630.11         | Kahler's disease                                             | Leukaemia            |
| 15211          | B630.12         | Myelomatosis                                                 | Leukaemia            |
| 22158          | B630000         | Malignant plasma cell neoplasm, extramedullary plasmacytoma  | Leukaemia            |
| 19028          | B630100         | Solitary myeloma                                             | Leukaemia            |
| 21329          | B630200         | Plasmacytoma NOS                                             | Leukaemia            |
| 46042          | B630300         | Lambda light chain myeloma                                   | Leukaemia            |
| 104418         | B630400         | Solitary plasmacytoma                                        | Leukaemia            |
| 39187          | B631.00         | Plasma cell leukaemia                                        | Leukaemia            |
| 64567          | B63y.00         | Other immunoproliferative neoplasms                          | Leukaemia            |
| 43450          | B63z.00         | Immunoproliferative neoplasm or myeloma NOS                  | Leukaemia            |
| 19372          | B64..00         | Lymphoid leukaemia                                           | Leukaemia            |
| 4222           | B64..11         | Lymphatic leukaemia                                          | Leukaemia            |
| 4251           | B640.00         | Acute lymphoid leukaemia                                     | Leukaemia            |
| 104325         | B640000         | B-cell acute lymphoblastic leukaemia                         | Leukaemia            |
| 8625           | B641.00         | Chronic lymphoid leukaemia                                   | Leukaemia            |
| 27790          | B641.11         | Chronic lymphatic leukaemia                                  | Leukaemia            |
| 104328         | B641000         | B-cell chronic lymphocytic leukaemia                         | Leukaemia            |
| 107017         | B641011         | Chronic lymphocytic leukaemia of B-cell type                 | Leukaemia            |
| 107052         | B641100         | Clinical stage A chronic lymphocytic leukaemia               | Leukaemia            |
| 106924         | B641200         | Clinical stage B chronic lymphocytic leukaemia               | Leukaemia            |

| <b>Medcode</b> | <b>Readcode</b> | <b>Description</b>                                   | <b>Cancer type</b> |
|----------------|-----------------|------------------------------------------------------|--------------------|
| 107163         | B641300         | Clinical stage C chronic lymphocytic leukaemia       | Leukaemia          |
| 72774          | B642.00         | Subacute lymphoid leukaemia                          | Leukaemia          |
| 49725          | B64y.00         | Other lymphoid leukaemia                             | Leukaemia          |
| 31586          | B64y100         | Prolymphocytic leukaemia                             | Leukaemia          |
| 37461          | B64y200         | Adult T-cell leukaemia                               | Leukaemia          |
| 108656         | B64y300         | B-cell prolymphocytic leukaemia                      | Leukaemia          |
| 107643         | B64y400         | T-cell prolymphocytic leukaemia                      | Leukaemia          |
| 104939         | B64y500         | Adult T-cell lymphoma/leukaemia (HTLV-1-associated)  | Leukaemia          |
| 38331          | B64yz00         | Other lymphoid leukaemia NOS                         | Leukaemia          |
| 38914          | B64z.00         | Lymphoid leukaemia NOS                               | Leukaemia          |
| 7176           | B65..00         | Myeloid leukaemia                                    | Leukaemia          |
| 4413           | B650.00         | Acute myeloid leukaemia                              | Leukaemia          |
| 10726          | B651.00         | Chronic myeloid leukaemia                            | Leukaemia          |
| 31701          | B651.11         | Chronic granulocytic leukaemia                       | Leukaemia          |
| 100786         | B651000         | Chronic eosinophilic leukaemia                       | Leukaemia          |
| 105957         | B651100         | Chronic myeloid leukaemia, BCR/ABL positive          | Leukaemia          |
| 102783         | B651200         | Chronic neutrophilic leukaemia                       | Leukaemia          |
| 107236         | B651300         | Atypical chronic myeloid leukaemia, BCR/ABL negative | Leukaemia          |
| 27520          | B651z00         | Chronic myeloid leukaemia NOS                        | Leukaemia          |
| 63475          | B652.00         | Subacute myeloid leukaemia                           | Leukaemia          |
| 70724          | B653.00         | Myeloid sarcoma                                      | Leukaemia          |
| 52327          | B653000         | Chloroma                                             | Leukaemia          |
| 39629          | B653100         | Granulocytic sarcoma                                 | Leukaemia          |
| 104788         | B654.00         | Acute myeloblastic leukaemia                         | Leukaemia          |
| 27664          | B65y100         | Acute promyelocytic leukaemia                        | Leukaemia          |
| 66089          | B65yz00         | Other myeloid leukaemia NOS                          | Leukaemia          |
| 33344          | B65z.00         | Myeloid leukaemia NOS                                | Leukaemia          |
| 35875          | B66..00         | Monocytic leukaemia                                  | Leukaemia          |
| 108715         | B66..11         | Histiocytic leukaemia                                | Leukaemia          |
| 67700          | B66..12         | Monoblastic leukaemia                                | Leukaemia          |
| 19974          | B660.00         | Acute monocytic leukaemia                            | Leukaemia          |
| 27458          | B661.00         | Chronic monocytic leukaemia                          | Leukaemia          |
| 101606         | B662.00         | Subacute monocytic leukaemia                         | Leukaemia          |
| 108424         | B663.00         | Acute monoblastic leukaemia                          | Leukaemia          |
| 99015          | B66y.00         | Other monocytic leukaemia                            | Leukaemia          |
| 103645         | B66yz00         | Other monocytic leukaemia NOS                        | Leukaemia          |
| 93342          | B66z.00         | Monocytic leukaemia NOS                              | Leukaemia          |
| 37272          | B67..00         | Other specified leukaemia                            | Leukaemia          |
| 42539          | B670.00         | Acute erythraemia and erythroleukaemia               | Leukaemia          |
| 27340          | B670.11         | Di Guglielmo's disease                               | Leukaemia          |
| 37468          | B671.00         | Chronic erythraemia                                  | Leukaemia          |
| 63653          | B671.11         | Heilmeyer-Schoner disease                            | Leukaemia          |
| 57671          | B672.00         | Megakaryocytic leukaemia                             | Leukaemia          |
| 65777          | B672.11         | Thrombocytic leukaemia                               | Leukaemia          |
| 65721          | B673.00         | Mast cell leukaemia                                  | Leukaemia          |
| 50858          | B674.00         | Acute panmyelosis                                    | Leukaemia          |



| <b>Medcode</b> | <b>Readcode</b> | <b>Description</b>                                           | <b>Cancer type</b> |
|----------------|-----------------|--------------------------------------------------------------|--------------------|
| 28276          | B675.00         | Acute myelofibrosis                                          | Leukaemia          |
| 104273         | B677.00         | Myelodysplastic and myeloproliferative disease               | Leukaemia          |
| 94174          | B67y.00         | Other and unspecified leukaemia                              | Leukaemia          |
| 72197          | B67y000         | Lymphosarcoma cell leukaemia                                 | Leukaemia          |
| 99413          | B67yz00         | Other and unspecified leukaemia NOS                          | Leukaemia          |
| 30632          | B67z.00         | Other specified leukaemia NOS                                | Leukaemia          |
| 25191          | B68..00         | Leukaemia of unspecified cell type                           | Leukaemia          |
| 4072           | B680.00         | Acute leukaemia NOS                                          | Leukaemia          |
| 16416          | B681.00         | Chronic leukaemia NOS                                        | Leukaemia          |
| 54793          | B682.00         | Subacute leukaemia NOS                                       | Leukaemia          |
| 34692          | B68y.00         | Other leukaemia of unspecified cell type                     | Leukaemia          |
| 4250           | B68z.00         | Leukaemia NOS                                                | Leukaemia          |
| 20440          | B69..00         | Myelomonocytic leukaemia                                     | Leukaemia          |
| 61500          | B690.00         | Acute myelomonocytic leukaemia                               | Leukaemia          |
| 22050          | B691.00         | Chronic myelomonocytic leukaemia                             | Leukaemia          |
| 104475         | B692.00         | Subacute myelomonocytic leukaemia                            | Leukaemia          |
| 105069         | B693.00         | Juvenile myelomonocytic leukaemia                            | Leukaemia          |
| 30646          | B6y..00         | Malignant neoplasm lymphatic or haematopoietic tissue OS     | Leukaemia          |
| 6115           | B6y0.00         | Myeloproliferative disorder                                  | Leukaemia          |
| 17056          | B6y0.11         | Myeloproliferative disease                                   | Leukaemia          |
| 39336          | B6y1.00         | Myelosclerosis with myeloid metaplasia                       | Leukaemia          |
| 110065         | B6y1.12         | Osteomyelofibrosis                                           | Leukaemia          |
| 67029          | ByuD500         | [X]Other lymphoid leukaemia                                  | Leukaemia          |
| 61693          | ByuD600         | [X]Other myeloid leukaemia                                   | Leukaemia          |
| 89762          | ByuD700         | [X]Other monocytic leukaemia                                 | Leukaemia          |
| 89329          | ByuD800         | [X]Other specified leukaemias                                | Leukaemia          |
| 65165          | ByuD900         | [X]Other leukaemia of unspecified cell type                  | Leukaemia          |
| 18617          | B51..00         | Malignant neoplasm of brain                                  | Brain cancer       |
| 10851          | B51..11         | Cerebral tumour-malignant                                    | Brain cancer       |
| 15711          | B510.00         | Malignant neoplasm cerebrum (excluding lobes and ventricles) | Brain cancer       |
| 48073          | B510000         | Malignant neoplasm of basal ganglia                          | Brain cancer       |
| 61399          | B510100         | Malignant neoplasm of cerebral cortex                        | Brain cancer       |
| 99913          | B510300         | Malignant neoplasm of globus pallidus                        | Brain cancer       |
| 70942          | B510400         | Malignant neoplasm of hypothalamus                           | Brain cancer       |
| 62126          | B510500         | Malignant neoplasm of thalamus                               | Brain cancer       |
| 54133          | B510z00         | Malignant neoplasm of cerebrum NOS                           | Brain cancer       |
| 42426          | B511.00         | Malignant neoplasm of frontal lobe                           | Brain cancer       |
| 46792          | B512.00         | Malignant neoplasm of temporal lobe                          | Brain cancer       |
| 67236          | B512000         | Malignant neoplasm of hippocampus                            | Brain cancer       |
| 47556          | B512z00         | Malignant neoplasm of temporal lobe NOS                      | Brain cancer       |
| 19226          | B513.00         | Malignant neoplasm of parietal lobe                          | Brain cancer       |
| 39088          | B514.00         | Malignant neoplasm of occipital lobe                         | Brain cancer       |
| 52511          | B515.00         | Malignant neoplasm of cerebral ventricles                    | Brain cancer       |
| 46789          | B515000         | Malignant neoplasm of choroid plexus                         | Brain cancer       |
| 45154          | B516.00         | Malignant neoplasm of cerebellum                             | Brain cancer       |
| 44089          | B517.00         | Malignant neoplasm of brain stem                             | Brain cancer       |

| <b>Medcode</b> | <b>Readcode</b> | <b>Description</b>                                           | <b>Cancer type</b>     |
|----------------|-----------------|--------------------------------------------------------------|------------------------|
| 64557          | B517000         | Malignant neoplasm of cerebral peduncle                      | Brain cancer           |
| 49132          | B517100         | Malignant neoplasm of medulla oblongata                      | Brain cancer           |
| 93537          | B517200         | Malignant neoplasm of midbrain                               | Brain cancer           |
| 91240          | B517300         | Malignant neoplasm of pons                                   | Brain cancer           |
| 68641          | B517z00         | Malignant neoplasm of brain stem NOS                         | Brain cancer           |
| 71139          | B51y.00         | Malignant neoplasm of other parts of brain                   | Brain cancer           |
| 59170          | B51y000         | Malignant neoplasm of corpus callosum                        | Brain cancer           |
| 65241          | B51y200         | Malignant neoplasm, overlapping lesion of brain              | Brain cancer           |
| 100733         | B51yz00         | Malignant neoplasm of other part of brain NOS                | Brain cancer           |
| 41520          | B51z.00         | Malignant neoplasm of brain NOS                              | Brain cancer           |
| 65458          | B52..00         | Malig neop of other and unspecified parts of nervous system  | Brain cancer           |
| 99621          | B520.00         | Malignant neoplasm of cranial nerves                         | Brain cancer           |
| 64971          | B520000         | Malignant neoplasm of olfactory bulb                         | Brain cancer           |
| 70126          | B520100         | Malignant neoplasm of optic nerve                            | Brain cancer           |
| 65599          | B520200         | Malignant neoplasm of acoustic nerve                         | Brain cancer           |
| 101086         | B520z00         | Malignant neoplasm of cranial nerves NOS                     | Brain cancer           |
| 28919          | B521.00         | Malignant neoplasm of cerebral meninges                      | Brain cancer           |
| 109473         | B521200         | Malignant neoplasm of cerebral pia mater                     | Brain cancer           |
| 70104          | B521z00         | Malignant neoplasm of cerebral meninges NOS                  | Brain cancer           |
| 41515          | ByuA100         | [X]Malignant neoplasm/central nervous system, unspecified    | Brain cancer           |
| 63925          | ByuA200         | [X]Malignant neoplasm of meninges, unspecified               | Brain cancer           |
| 47633          | ByuA300         | [X]Malig neopl, overlap lesion brain & other part of CNS     | Brain cancer           |
| 20160          | B50..00         | Malignant neoplasm of eye                                    | Eye cancer             |
| 98813          | B500.00         | Malig neop eyeball excl conjunctiva, cornea, retina, choroid | Eye cancer             |
| 59041          | B500000         | Malignant neoplasm of ciliary body                           | Eye cancer             |
| 59381          | B500100         | Malignant neoplasm of iris                                   | Eye cancer             |
| 106569         | B500200         | Malignant neoplasm of crystalline lens                       | Eye cancer             |
| 56718          | B500z00         | Malignant neoplasm of eyeball NOS                            | Eye cancer             |
| 45667          | B501.00         | Malignant neoplasm of orbit                                  | Eye cancer             |
| 86996          | B501000         | Malignant neoplasm of connective tissue of orbit             | Eye cancer             |
| 63104          | B501z00         | Malignant neoplasm of orbit NOS                              | Eye cancer             |
| 64817          | B502.00         | Malignant neoplasm of lacrimal gland                         | Eye cancer             |
| 63657          | B503.00         | Malignant neoplasm of conjunctiva                            | Eye cancer             |
| 73992          | B504.00         | Malignant neoplasm of cornea                                 | Eye cancer             |
| 28069          | B505.00         | Malignant neoplasm of retina                                 | Eye cancer             |
| 15991          | B506.00         | Malignant neoplasm of choroid                                | Eye cancer             |
| 71584          | B507.00         | Malignant neoplasm of lacrimal duct                          | Eye cancer             |
| 101805         | B507000         | Malignant neoplasm of lacrimal sac                           | Eye cancer             |
| 65357          | B507100         | Malignant neoplasm of nasolacrimal duct                      | Eye cancer             |
| 45922          | B508.00         | Malignant neoplasm, overlapping lesion of eye and adnexa     | Eye cancer             |
| 40437          | B50y.00         | Malignant neoplasm of other specified site of eye            | Eye cancer             |
| 54956          | B50z.00         | Malignant neoplasm of eye NOS                                | Eye cancer             |
| 19415          | B0...00         | Malignant neoplasm of lip, oral cavity and pharynx           | Ear-nose-throat cancer |
| 24374          | B0...11         | Carcinoma of lip, oral cavity and pharynx                    | Ear-nose-throat cancer |
| 14712          | B00..00         | Malignant neoplasm of lip                                    | Ear-nose-throat cancer |
| 9984           | B00..11         | Carcinoma of lip                                             | Ear-nose-throat cancer |

| <b>Medcode</b> | <b>Readcode</b> | <b>Description</b>                                           | <b>Cancer type</b>     |
|----------------|-----------------|--------------------------------------------------------------|------------------------|
| 73962          | B000.00         | Malignant neoplasm of upper lip, vermilion border            | Ear-nose-throat cancer |
| 66270          | B000000         | Malignant neoplasm of upper lip, external                    | Ear-nose-throat cancer |
| 50296          | B000100         | Malignant neoplasm of upper lip, lipstick area               | Ear-nose-throat cancer |
| 98740          | B000z00         | Malignant neoplasm of upper lip, vermilion border NOS        | Ear-nose-throat cancer |
| 67446          | B001.00         | Malignant neoplasm of lower lip, vermilion border            | Ear-nose-throat cancer |
| 66384          | B001000         | Malignant neoplasm of lower lip, external                    | Ear-nose-throat cancer |
| 95480          | B001100         | Malignant neoplasm of lower lip, lipstick area               | Ear-nose-throat cancer |
| 101707         | B001z00         | Malignant neoplasm of lower lip, vermilion border NOS        | Ear-nose-throat cancer |
| 99493          | B002.00         | Malignant neoplasm of upper lip, inner aspect                | Ear-nose-throat cancer |
| 99001          | B002100         | Malignant neoplasm of upper lip, frenulum                    | Ear-nose-throat cancer |
| 98500          | B002200         | Malignant neoplasm of upper lip, mucosa                      | Ear-nose-throat cancer |
| 90610          | B002300         | Malignant neoplasm of upper lip, oral aspect                 | Ear-nose-throat cancer |
| 100721         | B002z00         | Malignant neoplasm of upper lip, inner aspect NOS            | Ear-nose-throat cancer |
| 71147          | B003.00         | Malignant neoplasm of lower lip, inner aspect                | Ear-nose-throat cancer |
| 67504          | B003000         | Malignant neoplasm of lower lip, buccal aspect               | Ear-nose-throat cancer |
| 91843          | B003100         | Malignant neoplasm of lower lip, frenulum                    | Ear-nose-throat cancer |
| 89909          | B003200         | Malignant neoplasm of lower lip, mucosa                      | Ear-nose-throat cancer |
| 94441          | B003300         | Malignant neoplasm of lower lip, oral aspect                 | Ear-nose-throat cancer |
| 96782          | B003z00         | Malignant neoplasm of lower lip, inner aspect NOS            | Ear-nose-throat cancer |
| 61692          | B004.00         | Malignant neoplasm of lip unspecified, inner aspect          | Ear-nose-throat cancer |
| 73614          | B004000         | Malignant neoplasm of lip unspecified, buccal aspect         | Ear-nose-throat cancer |
| 68399          | B004200         | Malignant neoplasm of lip unspecified, mucosa                | Ear-nose-throat cancer |
| 100144         | B004300         | Malignant neoplasm of lip, oral aspect                       | Ear-nose-throat cancer |
| 96783          | B005.00         | Malignant neoplasm of commissure of lip                      | Ear-nose-throat cancer |
| 18882          | B006.00         | Malignant neoplasm of overlapping lesion of lip              | Ear-nose-throat cancer |
| 37553          | B007.00         | Malignant neoplasm of lip, unspecified                       | Ear-nose-throat cancer |
| 100906         | B00z000         | Malignant neoplasm of lip, unspecified, external             | Ear-nose-throat cancer |
| 94251          | B00z100         | Malignant neoplasm of lip, unspecified, lipstick area        | Ear-nose-throat cancer |
| 69761          | B00zz00         | Malignant neoplasm of lip, vermilion border NOS              | Ear-nose-throat cancer |
| 10283          | B01..00         | Malignant neoplasm of tongue                                 | Ear-nose-throat cancer |
| 43431          | B010.00         | Malignant neoplasm of base of tongue                         | Ear-nose-throat cancer |
| 69671          | B010.11         | Malignant neoplasm of posterior third of tongue              | Ear-nose-throat cancer |
| 34409          | B010000         | Malignant neoplasm of base of tongue dorsal surface          | Ear-nose-throat cancer |
| 91035          | B010z00         | Malignant neoplasm of fixed part of tongue NOS               | Ear-nose-throat cancer |
| 43642          | B011.00         | Malignant neoplasm of dorsal surface of tongue               | Ear-nose-throat cancer |
| 107258         | B011100         | Malignant neoplasm of midline of tongue                      | Ear-nose-throat cancer |
| 43781          | B011z00         | Malignant neoplasm of dorsum of tongue NOS                   | Ear-nose-throat cancer |
| 36161          | B012.00         | Malignant neoplasm of tongue, tip and lateral border         | Ear-nose-throat cancer |
| 62840          | B013.00         | Malignant neoplasm of ventral surface of tongue              | Ear-nose-throat cancer |
| 102142         | B013000         | Malignant neoplasm of anterior 2/3 of tongue ventral surface | Ear-nose-throat cancer |
| 63979          | B013100         | Malignant neoplasm of frenulum linguae                       | Ear-nose-throat cancer |
| 38488          | B013z00         | Malignant neoplasm of ventral tongue surface NOS             | Ear-nose-throat cancer |
| 58121          | B014.00         | Malignant neoplasm of anterior 2/3 of tongue unspecified     | Ear-nose-throat cancer |
| 37096          | B015.00         | Malignant neoplasm of tongue, junctional zone                | Ear-nose-throat cancer |
| 24852          | B016.00         | Malignant neoplasm of lingual tonsil                         | Ear-nose-throat cancer |
| 47205          | B017.00         | Malignant overlapping lesion of tongue                       | Ear-nose-throat cancer |

| <b>Medcode</b> | <b>Readcode</b> | <b>Description</b>                                         | <b>Cancer type</b>     |
|----------------|-----------------|------------------------------------------------------------|------------------------|
| 41530          | B01y.00         | Malignant neoplasm of other sites of tongue                | Ear-nose-throat cancer |
| 40557          | B01z.00         | Malignant neoplasm of tongue NOS                           | Ear-nose-throat cancer |
| 20292          | B02..00         | Malignant neoplasm of major salivary glands                | Ear-nose-throat cancer |
| 4388           | B020.00         | Malignant neoplasm of parotid gland                        | Ear-nose-throat cancer |
| 51786          | B021.00         | Malignant neoplasm of submandibular gland                  | Ear-nose-throat cancer |
| 70928          | B022.00         | Malignant neoplasm of sublingual gland                     | Ear-nose-throat cancer |
| 70696          | B02y.00         | Malignant neoplasm of other major salivary glands          | Ear-nose-throat cancer |
| 50475          | B02z.00         | Malignant neoplasm of major salivary gland NOS             | Ear-nose-throat cancer |
| 43400          | B03..00         | Malignant neoplasm of gum                                  | Ear-nose-throat cancer |
| 32024          | B030.00         | Malignant neoplasm of upper gum                            | Ear-nose-throat cancer |
| 49360          | B031.00         | Malignant neoplasm of lower gum                            | Ear-nose-throat cancer |
| 101753         | B03y.00         | Malignant neoplasm of other sites of gum                   | Ear-nose-throat cancer |
| 93218          | B03z.00         | Malignant neoplasm of gum NOS                              | Ear-nose-throat cancer |
| 20092          | B04..00         | Malignant neoplasm of floor of mouth                       | Ear-nose-throat cancer |
| 45408          | B040.00         | Malignant neoplasm of anterior portion of floor of mouth   | Ear-nose-throat cancer |
| 45986          | B041.00         | Malignant neoplasm of lateral portion of floor of mouth    | Ear-nose-throat cancer |
| 17912          | B042.00         | Malignant neoplasm, overlapping lesion of floor of mouth   | Ear-nose-throat cancer |
| 56709          | B04y.00         | Malignant neoplasm of other sites of floor of mouth        | Ear-nose-throat cancer |
| 36716          | B04z.00         | Malignant neoplasm of floor of mouth NOS                   | Ear-nose-throat cancer |
| 14792          | B05..00         | Malignant neoplasm of other and unspecified parts of mouth | Ear-nose-throat cancer |
| 31364          | B050.00         | Malignant neoplasm of cheek mucosa                         | Ear-nose-throat cancer |
| 30402          | B050.11         | Malignant neoplasm of buccal mucosa                        | Ear-nose-throat cancer |
| 103796         | B051.00         | Malignant neoplasm of vestibule of mouth                   | Ear-nose-throat cancer |
| 95772          | B051000         | Malignant neoplasm of upper buccal sulcus                  | Ear-nose-throat cancer |
| 97530          | B051100         | Malignant neoplasm of lower buccal sulcus                  | Ear-nose-throat cancer |
| 37590          | B052.00         | Malignant neoplasm of hard palate                          | Ear-nose-throat cancer |
| 40292          | B053.00         | Malignant neoplasm of soft palate                          | Ear-nose-throat cancer |
| 37516          | B054.00         | Malignant neoplasm of uvula                                | Ear-nose-throat cancer |
| 70819          | B055.00         | Malignant neoplasm of palate unspecified                   | Ear-nose-throat cancer |
| 96003          | B055000         | Malignant neoplasm of junction of hard and soft palate     | Ear-nose-throat cancer |
| 69951          | B055100         | Malignant neoplasm of roof of mouth                        | Ear-nose-throat cancer |
| 28559          | B055z00         | Malignant neoplasm of palate NOS                           | Ear-nose-throat cancer |
| 37724          | B056.00         | Malignant neoplasm of retromolar area                      | Ear-nose-throat cancer |
| 10314          | B057.00         | Overlapping lesion of other and unspecified parts of mouth | Ear-nose-throat cancer |
| 37916          | B05y.00         | Malignant neoplasm of other specified mouth parts          | Ear-nose-throat cancer |
| 55015          | B05z.00         | Malignant neoplasm of mouth NOS                            | Ear-nose-throat cancer |
| 37549          | B05z000         | Kaposi's sarcoma of palate                                 | Ear-nose-throat cancer |
| 22893          | B06..00         | Malignant neoplasm of oropharynx                           | Ear-nose-throat cancer |
| 16241          | B060.00         | Malignant neoplasm of tonsil                               | Ear-nose-throat cancer |
| 26448          | B060000         | Malignant neoplasm of faucial tonsil                       | Ear-nose-throat cancer |
| 101988         | B060100         | Malignant neoplasm of palatine tonsil                      | Ear-nose-throat cancer |
| 102151         | B060200         | Malignant neoplasm of overlapping lesion of tonsil         | Ear-nose-throat cancer |
| 53884          | B060z00         | Malignant neoplasm tonsil NOS                              | Ear-nose-throat cancer |
| 24397          | B061.00         | Malignant neoplasm of tonsillar fossa                      | Ear-nose-throat cancer |
| 55066          | B062.00         | Malignant neoplasm of tonsillar pillar                     | Ear-nose-throat cancer |
| 51926          | B062000         | Malignant neoplasm of faucial pillar                       | Ear-nose-throat cancer |

| <b>Medcode</b> | <b>Readcode</b> | <b>Description</b>                                           | <b>Cancer type</b>     |
|----------------|-----------------|--------------------------------------------------------------|------------------------|
| 99185          | B062100         | Malignant neoplasm of glossopalatine fold                    | Ear-nose-throat cancer |
| 61510          | B062200         | Malignant neoplasm of palatoglossal arch                     | Ear-nose-throat cancer |
| 93842          | B062300         | Malignant neoplasm of palatopharyngeal arch                  | Ear-nose-throat cancer |
| 100002         | B062z00         | Malignant neoplasm of tonsillar fossa NOS                    | Ear-nose-throat cancer |
| 39554          | B063.00         | Malignant neoplasm of vallecula                              | Ear-nose-throat cancer |
| 46728          | B064.00         | Malignant neoplasm of anterior epiglottis                    | Ear-nose-throat cancer |
| 26134          | B064000         | Malignant neoplasm of epiglottis, free border                | Ear-nose-throat cancer |
| 91895          | B064100         | Malignant neoplasm of glossoepiglottic fold                  | Ear-nose-throat cancer |
| 73439          | B064z00         | Malignant neoplasm of anterior epiglottis NOS                | Ear-nose-throat cancer |
| 48519          | B065.00         | Malignant neoplasm of junctional region of epiglottis        | Ear-nose-throat cancer |
| 56355          | B066.00         | Malignant neoplasm of lateral wall of oropharynx             | Ear-nose-throat cancer |
| 90124          | B067.00         | Malignant neoplasm of posterior wall of oropharynx           | Ear-nose-throat cancer |
| 67323          | B06y.00         | Malignant neoplasm of oropharynx, other specified sites      | Ear-nose-throat cancer |
| 91037          | B06yz00         | Malignant neoplasm of other specified site of oropharynx NOS | Ear-nose-throat cancer |
| 43200          | B06z.00         | Malignant neoplasm of oropharynx NOS                         | Ear-nose-throat cancer |
| 24675          | B07..00         | Malignant neoplasm of nasopharynx                            | Ear-nose-throat cancer |
| 94390          | B070.00         | Malignant neoplasm of roof of nasopharynx                    | Ear-nose-throat cancer |
| 95429          | B071.00         | Malignant neoplasm of posterior wall of nasopharynx          | Ear-nose-throat cancer |
| 33388          | B071000         | Malignant neoplasm of adenoid                                | Ear-nose-throat cancer |
| 46548          | B071100         | Malignant neoplasm of pharyngeal tonsil                      | Ear-nose-throat cancer |
| 96869          | B071z00         | Malignant neoplasm of posterior wall of nasopharynx NOS      | Ear-nose-throat cancer |
| 59004          | B072.00         | Malignant neoplasm of lateral wall of nasopharynx            | Ear-nose-throat cancer |
| 37940          | B072000         | Malignant neoplasm of pharyngeal recess                      | Ear-nose-throat cancer |
| 102205         | B072z00         | Malignant neoplasm of lateral wall of nasopharynx NOS        | Ear-nose-throat cancer |
| 44139          | B073.00         | Malignant neoplasm of anterior wall of nasopharynx           | Ear-nose-throat cancer |
| 106915         | B073100         | Malignant neoplasm of nasopharyngeal soft palate surface     | Ear-nose-throat cancer |
| 99386          | B073200         | Malignant neoplasm posterior margin nasal septum and choanae | Ear-nose-throat cancer |
| 100918         | B073z00         | Malignant neoplasm of anterior wall of nasopharynx NOS       | Ear-nose-throat cancer |
| 66422          | B074.00         | Malignant neoplasm, overlapping lesion of nasopharynx        | Ear-nose-throat cancer |
| 55630          | B07y.00         | Malignant neoplasm of other specified site of nasopharynx    | Ear-nose-throat cancer |
| 28665          | B07z.00         | Malignant neoplasm of nasopharynx NOS                        | Ear-nose-throat cancer |
| 34012          | B08..00         | Malignant neoplasm of hypopharynx                            | Ear-nose-throat cancer |
| 43548          | B080.00         | Malignant neoplasm of postcricoid region                     | Ear-nose-throat cancer |
| 39897          | B081.00         | Malignant neoplasm of pyriform sinus                         | Ear-nose-throat cancer |
| 57248          | B082.00         | Malignant neoplasm aryepiglottic fold, hypopharyngeal aspect | Ear-nose-throat cancer |
| 64462          | B083.00         | Malignant neoplasm of posterior pharynx                      | Ear-nose-throat cancer |
| 88362          | B08y.00         | Malignant neoplasm of other specified hypopharyngeal site    | Ear-nose-throat cancer |
| 28451          | B08z.00         | Malignant neoplasm of hypopharynx NOS                        | Ear-nose-throat cancer |
| 46114          | B0z..00         | Malig neop other/ill-defined sites lip, oral cavity, pharynx | Ear-nose-throat cancer |
| 16297          | B0z0.00         | Malignant neoplasm of pharynx unspecified                    | Ear-nose-throat cancer |
| 95016          | B0z1.00         | Malignant neoplasm of Waldeyer's ring                        | Ear-nose-throat cancer |
| 39084          | B0z2.00         | Malignant neoplasm of laryngopharynx                         | Ear-nose-throat cancer |
| 49758          | B0zy.00         | Malignant neoplasm of other sites lip, oral cavity, pharynx  | Ear-nose-throat cancer |
| 39430          | B0zz.00         | Malignant neoplasm of lip, oral cavity and pharynx NOS       | Ear-nose-throat cancer |
| 23389          | B200.00         | Malignant neoplasm of nasal cavities                         | Ear-nose-throat cancer |
| 71204          | B200000         | Malignant neoplasm of cartilage of nose                      | Ear-nose-throat cancer |

| <b>Medcode</b> | <b>Readcode</b> | <b>Description</b>                                          | <b>Cancer type</b>          |
|----------------|-----------------|-------------------------------------------------------------|-----------------------------|
| 98911          | B200100         | Malignant neoplasm of nasal conchae                         | Ear-nose-throat cancer      |
| 62761          | B200200         | Malignant neoplasm of septum of nose                        | Ear-nose-throat cancer      |
| 62182          | B200300         | Malignant neoplasm of vestibule of nose                     | Ear-nose-throat cancer      |
| 42856          | B200z00         | Malignant neoplasm of nasal cavities NOS                    | Ear-nose-throat cancer      |
| 24456          | B201.00         | Malig neop auditory tube, middle ear and mastoid air cells  | Ear-nose-throat cancer      |
| 107916         | B201000         | Malignant neoplasm of auditory (Eustachian) tube            | Ear-nose-throat cancer      |
| 98537          | B201100         | Malignant neoplasm of tympanic cavity                       | Ear-nose-throat cancer      |
| 54613          | B201200         | Malignant neoplasm of tympanic antrum                       | Ear-nose-throat cancer      |
| 71946          | B201300         | Malignant neoplasm of mastoid air cells                     | Ear-nose-throat cancer      |
| 73537          | B201z00         | Malig neop auditory tube, middle ear, mastoid air cells NOS | Ear-nose-throat cancer      |
| 32174          | B202.00         | Malignant neoplasm of maxillary sinus                       | Ear-nose-throat cancer      |
| 54636          | B203.00         | Malignant neoplasm of ethmoid sinus                         | Ear-nose-throat cancer      |
| 15684          | B204.00         | Malignant neoplasm of frontal sinus                         | Ear-nose-throat cancer      |
| 65215          | B205.00         | Malignant neoplasm of sphenoidal sinus                      | Ear-nose-throat cancer      |
| 39590          | B206.00         | Malignant neoplasm, overlapping lesion of accessory sinuses | Ear-nose-throat cancer      |
| 96971          | B20y.00         | Malig neop other site nasal cavity, middle ear and sinuses  | Ear-nose-throat cancer      |
| 55246          | B20z.00         | Malignant neoplasm of accessory sinus NOS                   | Ear-nose-throat cancer      |
| 95390          | B800.00         | Carcinoma in situ of lip, oral cavity and pharynx           | Ear-nose-throat cancer      |
| 37505          | B800.11         | Carcinoma in situ of oral cavity                            | Ear-nose-throat cancer      |
| 42129          | B800.12         | Carcinoma in situ of pharynx                                | Ear-nose-throat cancer      |
| 47737          | B800000         | Carcinoma in situ of lip                                    | Ear-nose-throat cancer      |
| 27944          | B800100         | Carcinoma in situ of tongue                                 | Ear-nose-throat cancer      |
| 50288          | B800200         | Carcinoma in situ of salivary glands                        | Ear-nose-throat cancer      |
| 57866          | B800300         | Carcinoma in situ of gums                                   | Ear-nose-throat cancer      |
| 24801          | B800400         | Carcinoma in situ of floor of mouth                         | Ear-nose-throat cancer      |
| 34823          | B800500         | Carcinoma in situ of cheek                                  | Ear-nose-throat cancer      |
| 30966          | B800600         | Carcinoma in situ of palate                                 | Ear-nose-throat cancer      |
| 36104          | B800700         | Carcinoma in situ of nasopharynx                            | Ear-nose-throat cancer      |
| 50419          | B800800         | Carcinoma in situ of oropharynx                             | Ear-nose-throat cancer      |
| 44663          | B800900         | Carcinoma in situ of hypopharynx                            | Ear-nose-throat cancer      |
| 37187          | B800z00         | Carcinoma in situ of lip, oral cavity and pharynx NOS       | Ear-nose-throat cancer      |
| 58973          | Byu0.00         | [X]Malignant neoplasm of lip, oral cavity and pharynx       | Ear-nose-throat cancer      |
| 319            | B21..00         | Malignant neoplasm of larynx                                | Lung and respiratory cancer |
| 318            | B210.00         | Malignant neoplasm of glottis                               | Lung and respiratory cancer |
| 26165          | B211.00         | Malignant neoplasm of supraglottis                          | Lung and respiratory cancer |
| 22441          | B212.00         | Malignant neoplasm of subglottis                            | Lung and respiratory cancer |
| 43111          | B213.00         | Malignant neoplasm of laryngeal cartilage                   | Lung and respiratory cancer |
| 63460          | B213000         | Malignant neoplasm of arytenoid cartilage                   | Lung and respiratory cancer |
| 37805          | B213100         | Malignant neoplasm of cricoid cartilage                     | Lung and respiratory cancer |
| 107878         | B213200         | Malignant neoplasm of cuneiform cartilage                   | Lung and respiratory cancer |
| 47862          | B213300         | Malignant neoplasm of thyroid cartilage                     | Lung and respiratory cancer |

| <b>Medcode</b> | <b>Readcode</b> | <b>Description</b>                                          | <b>Cancer type</b>          |
|----------------|-----------------|-------------------------------------------------------------|-----------------------------|
| 97332          | B213z00         | Malignant neoplasm of laryngeal cartilage NOS               | Lung and respiratory cancer |
| 50579          | B214.00         | Malignant neoplasm, overlapping lesion of larynx            | Lung and respiratory cancer |
| 55374          | B215.00         | Malignant neoplasm of epiglottis NOS                        | Lung and respiratory cancer |
| 26813          | B21y.00         | Malignant neoplasm of larynx, other specified site          | Lung and respiratory cancer |
| 9237           | B21z.00         | Malignant neoplasm of larynx NOS                            | Lung and respiratory cancer |
| 13243          | B22..00         | Malignant neoplasm of trachea, bronchus and lung            | Lung and respiratory cancer |
| 15221          | B220.00         | Malignant neoplasm of trachea                               | Lung and respiratory cancer |
| 103946         | B220100         | Malignant neoplasm of mucosa of trachea                     | Lung and respiratory cancer |
| 37810          | B220z00         | Malignant neoplasm of trachea NOS                           | Lung and respiratory cancer |
| 12870          | B221.00         | Malignant neoplasm of main bronchus                         | Lung and respiratory cancer |
| 17391          | B221000         | Malignant neoplasm of carina of bronchus                    | Lung and respiratory cancer |
| 33444          | B221100         | Malignant neoplasm of hilus of lung                         | Lung and respiratory cancer |
| 21698          | B221z00         | Malignant neoplasm of main bronchus NOS                     | Lung and respiratory cancer |
| 10358          | B222.00         | Malignant neoplasm of upper lobe, bronchus or lung          | Lung and respiratory cancer |
| 20170          | B222.11         | Pancoast's syndrome                                         | Lung and respiratory cancer |
| 31700          | B222000         | Malignant neoplasm of upper lobe bronchus                   | Lung and respiratory cancer |
| 25886          | B222100         | Malignant neoplasm of upper lobe of lung                    | Lung and respiratory cancer |
| 44169          | B222z00         | Malignant neoplasm of upper lobe, bronchus or lung NOS      | Lung and respiratory cancer |
| 31268          | B223.00         | Malignant neoplasm of middle lobe, bronchus or lung         | Lung and respiratory cancer |
| 41523          | B223000         | Malignant neoplasm of middle lobe bronchus                  | Lung and respiratory cancer |
| 39923          | B223100         | Malignant neoplasm of middle lobe of lung                   | Lung and respiratory cancer |
| 54134          | B223z00         | Malignant neoplasm of middle lobe, bronchus or lung NOS     | Lung and respiratory cancer |
| 31188          | B224.00         | Malignant neoplasm of lower lobe, bronchus or lung          | Lung and respiratory cancer |
| 18678          | B224000         | Malignant neoplasm of lower lobe bronchus                   | Lung and respiratory cancer |
| 12582          | B224100         | Malignant neoplasm of lower lobe of lung                    | Lung and respiratory cancer |
| 42566          | B224z00         | Malignant neoplasm of lower lobe, bronchus or lung NOS      | Lung and respiratory cancer |
| 36371          | B225.00         | Malignant neoplasm of overlapping lesion of bronchus & lung | Lung and respiratory cancer |
| 7484           | B226.00         | Mesothelioma                                                | Lung and respiratory cancer |
| 38961          | B22y.00         | Malignant neoplasm of other sites of bronchus or lung       | Lung and respiratory cancer |
| 3903           | B22z.00         | Malignant neoplasm of bronchus or lung NOS                  | Lung and respiratory cancer |

| <b>Medcode</b> | <b>Readcode</b> | <b>Description</b>                                           | <b>Cancer type</b>          |
|----------------|-----------------|--------------------------------------------------------------|-----------------------------|
| 2587           | B22z.11         | Lung cancer                                                  | Lung and respiratory cancer |
| 31573          | B23..00         | Malignant neoplasm of pleura                                 | Lung and respiratory cancer |
| 67107          | B230.00         | Malignant neoplasm of parietal pleura                        | Lung and respiratory cancer |
| 106194         | B231.00         | Malignant neoplasm of visceral pleura                        | Lung and respiratory cancer |
| 9600           | B232.00         | Mesothelioma of pleura                                       | Lung and respiratory cancer |
| 98104          | B23y.00         | Malignant neoplasm of other specified pleura                 | Lung and respiratory cancer |
| 34742          | B23z.00         | Malignant neoplasm of pleura NOS                             | Lung and respiratory cancer |
| 64050          | B81..00         | Carcinoma in situ of respiratory system                      | Lung and respiratory cancer |
| 11403          | B810.00         | Carcinoma in situ of larynx                                  | Lung and respiratory cancer |
| 35772          | B810000         | Carcinoma in situ of thyroid cartilage                       | Lung and respiratory cancer |
| 36948          | B810100         | Carcinoma in situ of cricoid cartilage                       | Lung and respiratory cancer |
| 53460          | B810200         | Carcinoma in situ of epiglottis                              | Lung and respiratory cancer |
| 65953          | B810300         | Carcinoma in situ of arytenoid cartilage                     | Lung and respiratory cancer |
| 31860          | B810600         | Carcinoma in situ of aryepiglottic fold                      | Lung and respiratory cancer |
| 73076          | B810700         | Carcinoma in situ of vestibular fold                         | Lung and respiratory cancer |
| 7697           | B810800         | Carcinoma in situ of vocal fold-glottis                      | Lung and respiratory cancer |
| 10375          | B810811         | Carcinoma in situ of glottis                                 | Lung and respiratory cancer |
| 53882          | B810z00         | Carcinoma in situ of larynx NOS                              | Lung and respiratory cancer |
| 51714          | B811.00         | Carcinoma in situ of trachea                                 | Lung and respiratory cancer |
| 9267           | B812.00         | Carcinoma in situ of bronchus and lung                       | Lung and respiratory cancer |
| 49159          | B812000         | Carcinoma in situ of carina of bronchus                      | Lung and respiratory cancer |
| 35058          | B812100         | Carcinoma in situ of main bronchus                           | Lung and respiratory cancer |
| 37579          | B812200         | Carcinoma in situ of upper lobe bronchus and lung            | Lung and respiratory cancer |
| 47897          | B812300         | Carcinoma in situ of middle lobe bronchus and lung           | Lung and respiratory cancer |
| 52373          | B812400         | Carcinoma in situ of lower lobe bronchus and lung            | Lung and respiratory cancer |
| 25372          | B812z00         | Carcinoma in situ of bronchus or lung NOS                    | Lung and respiratory cancer |
| 97954          | B81y.00         | Carcinoma in situ of other specified part respiratory system | Lung and respiratory cancer |
| 59426          | B81y.11         | Carcinoma in situ of nasal sinuses                           | Lung and respiratory cancer |
| 46497          | B81y000         | Carcinoma in situ of pleura                                  | Lung and respiratory cancer |
| 95559          | B81yz00         | Carcinoma in situ of specified parts respiratory system NOS  | Lung and respiratory cancer |



| <b>Medcode</b> | <b>Readcode</b> | <b>Description</b>                                           | <b>Cancer type</b>          |
|----------------|-----------------|--------------------------------------------------------------|-----------------------------|
| 62610          | B81z.00         | Carcinoma in situ of respiratory organ NOS                   | Lung and respiratory cancer |
| 35325          | Byu2.00         | [X]Malignant neoplasm of respiratory and intrathoracic organ | Lung and respiratory cancer |
| 40595          | Byu2000         | [X]Malignant neoplasm of bronchus or lung, unspecified       | Lung and respiratory cancer |
| 21715          | Byu5011         | [X]Mesothelioma of lung                                      | Lung and respiratory cancer |
| 100781         | ByuF300         | [X]Carcinoma in situ of other parts of respiratory system    | Lung and respiratory cancer |
| 15709          | B1...00         | Malignant neoplasm of digestive organs and peritoneum        | Gastro-intestinal cancer    |
| 3357           | B1...11         | Carcinoma of digestive organs and peritoneum                 | Gastro-intestinal cancer    |
| 1062           | B10..00         | Malignant neoplasm of oesophagus                             | Gastro-intestinal cancer    |
| 61695          | B100.00         | Malignant neoplasm of cervical oesophagus                    | Gastro-intestinal cancer    |
| 41362          | B101.00         | Malignant neoplasm of thoracic oesophagus                    | Gastro-intestinal cancer    |
| 63470          | B102.00         | Malignant neoplasm of abdominal oesophagus                   | Gastro-intestinal cancer    |
| 50789          | B103.00         | Malignant neoplasm of upper third of oesophagus              | Gastro-intestinal cancer    |
| 54171          | B104.00         | Malignant neoplasm of middle third of oesophagus             | Gastro-intestinal cancer    |
| 42416          | B105.00         | Malignant neoplasm of lower third of oesophagus              | Gastro-intestinal cancer    |
| 67497          | B106.00         | Malignant neoplasm, overlapping lesion of oesophagus         | Gastro-intestinal cancer    |
| 98142          | B107.00         | Siewert type I adenocarcinoma                                | Gastro-intestinal cancer    |
| 53591          | B10y.00         | Malignant neoplasm of other specified part of oesophagus     | Gastro-intestinal cancer    |
| 30700          | B10z.00         | Malignant neoplasm of oesophagus NOS                         | Gastro-intestinal cancer    |
| 4865           | B10z.11         | Oesophageal cancer                                           | Gastro-intestinal cancer    |
| 8386           | B11..00         | Malignant neoplasm of stomach                                | Gastro-intestinal cancer    |
| 10368          | B11..11         | Gastric neoplasm                                             | Gastro-intestinal cancer    |
| 32022          | B110.00         | Malignant neoplasm of cardia of stomach                      | Gastro-intestinal cancer    |
| 100584         | B110000         | Malignant neoplasm of cardiac orifice of stomach             | Gastro-intestinal cancer    |
| 22894          | B110100         | Malignant neoplasm of cardio-oesophageal junction of stomach | Gastro-intestinal cancer    |
| 94278          | B110111         | Malignant neoplasm of gastro-oesophageal junction            | Gastro-intestinal cancer    |
| 37859          | B110z00         | Malignant neoplasm of cardia of stomach NOS                  | Gastro-intestinal cancer    |
| 21620          | B111.00         | Malignant neoplasm of pylorus of stomach                     | Gastro-intestinal cancer    |
| 48237          | B111000         | Malignant neoplasm of prepylorus of stomach                  | Gastro-intestinal cancer    |
| 41215          | B111100         | Malignant neoplasm of pyloric canal of stomach               | Gastro-intestinal cancer    |
| 59092          | B111z00         | Malignant neoplasm of pylorus of stomach NOS                 | Gastro-intestinal cancer    |

| <b>Medcode</b> | <b>Readcode</b> | <b>Description</b>                                         | <b>Cancer type</b>       |
|----------------|-----------------|------------------------------------------------------------|--------------------------|
| 19318          | B112.00         | Malignant neoplasm of pyloric antrum of stomach            | Gastro-intestinal cancer |
| 32362          | B113.00         | Malignant neoplasm of fundus of stomach                    | Gastro-intestinal cancer |
| 43572          | B114.00         | Malignant neoplasm of body of stomach                      | Gastro-intestinal cancer |
| 42193          | B115.00         | Malignant neoplasm of lesser curve of stomach unspecified  | Gastro-intestinal cancer |
| 55434          | B116.00         | Malignant neoplasm of greater curve of stomach unspecified | Gastro-intestinal cancer |
| 51690          | B117.00         | Malignant neoplasm, overlapping lesion of stomach          | Gastro-intestinal cancer |
| 97499          | B118.00         | Siewert type II adenocarcinoma                             | Gastro-intestinal cancer |
| 96094          | B119.00         | Siewert type III adenocarcinoma                            | Gastro-intestinal cancer |
| 55019          | B11y.00         | Malignant neoplasm of other specified site of stomach      | Gastro-intestinal cancer |
| 65312          | B11y000         | Malignant neoplasm of anterior wall of stomach NEC         | Gastro-intestinal cancer |
| 96802          | B11y100         | Malignant neoplasm of posterior wall of stomach NEC        | Gastro-intestinal cancer |
| 65372          | B11yz00         | Malignant neoplasm of other specified site of stomach NOS  | Gastro-intestinal cancer |
| 14800          | B11z.00         | Malignant neoplasm of stomach NOS                          | Gastro-intestinal cancer |
| 6806           | B12..00         | Malignant neoplasm of small intestine and duodenum         | Gastro-intestinal cancer |
| 18613          | B120.00         | Malignant neoplasm of duodenum                             | Gastro-intestinal cancer |
| 43479          | B121.00         | Malignant neoplasm of jejunum                              | Gastro-intestinal cancer |
| 33871          | B122.00         | Malignant neoplasm of ileum                                | Gastro-intestinal cancer |
| 63995          | B123.00         | Malignant neoplasm of Meckel's diverticulum                | Gastro-intestinal cancer |
| 66166          | B124.00         | Malignant neoplasm, overlapping lesion of small intestine  | Gastro-intestinal cancer |
| 99896          | B12y.00         | Malignant neoplasm of other specified site small intestine | Gastro-intestinal cancer |
| 43390          | B12z.00         | Malignant neoplasm of small intestine NOS                  | Gastro-intestinal cancer |
| 1220           | B13..00         | Malignant neoplasm of colon                                | Gastro-intestinal cancer |
| 9088           | B130.00         | Malignant neoplasm of hepatic flexure of colon             | Gastro-intestinal cancer |
| 6935           | B131.00         | Malignant neoplasm of transverse colon                     | Gastro-intestinal cancer |
| 10864          | B132.00         | Malignant neoplasm of descending colon                     | Gastro-intestinal cancer |
| 2815           | B133.00         | Malignant neoplasm of sigmoid colon                        | Gastro-intestinal cancer |
| 3811           | B134.00         | Malignant neoplasm of caecum                               | Gastro-intestinal cancer |
| 22163          | B134.11         | Carcinoma of caecum                                        | Gastro-intestinal cancer |
| 18632          | B135.00         | Malignant neoplasm of appendix                             | Gastro-intestinal cancer |
| 10946          | B136.00         | Malignant neoplasm of ascending colon                      | Gastro-intestinal cancer |

| <b>Medcode</b> | <b>Readcode</b> | <b>Description</b>                                           | <b>Cancer type</b>       |
|----------------|-----------------|--------------------------------------------------------------|--------------------------|
| 18619          | B137.00         | Malignant neoplasm of splenic flexure of colon               | Gastro-intestinal cancer |
| 93478          | B138.00         | Malignant neoplasm, overlapping lesion of colon              | Gastro-intestinal cancer |
| 101700         | B139.00         | Hereditary nonpolyposis colon cancer                         | Gastro-intestinal cancer |
| 48231          | B13y.00         | Malignant neoplasm of other specified sites of colon         | Gastro-intestinal cancer |
| 28163          | B13z.00         | Malignant neoplasm of colon NOS                              | Gastro-intestinal cancer |
| 9118           | B13z.11         | Colonic cancer                                               | Gastro-intestinal cancer |
| 35357          | B14..00         | Malignant neoplasm of rectum, rectosigmoid junction and anus | Gastro-intestinal cancer |
| 27855          | B140.00         | Malignant neoplasm of rectosigmoid junction                  | Gastro-intestinal cancer |
| 1800           | B141.00         | Malignant neoplasm of rectum                                 | Gastro-intestinal cancer |
| 7219           | B141.11         | Carcinoma of rectum                                          | Gastro-intestinal cancer |
| 5901           | B141.12         | Rectal carcinoma                                             | Gastro-intestinal cancer |
| 24370          | B142.00         | Malignant neoplasm of anal canal                             | Gastro-intestinal cancer |
| 9491           | B142.11         | Anal carcinoma                                               | Gastro-intestinal cancer |
| 46159          | B142000         | Malignant neoplasm of cloacogenic zone                       | Gastro-intestinal cancer |
| 27897          | B143.00         | Malignant neoplasm of anus unspecified                       | Gastro-intestinal cancer |
| 55659          | B14y.00         | Malig neop other site rectum, rectosigmoid junction and anus | Gastro-intestinal cancer |
| 50974          | B14z.00         | Malignant neoplasm rectum,rectosigmoid junction and anus NOS | Gastro-intestinal cancer |
| 17559          | B1z0.00         | Malignant neoplasm of intestinal tract, part unspecified     | Gastro-intestinal cancer |
| 11628          | B1z0.11         | Cancer of bowel                                              | Gastro-intestinal cancer |
| 94776          | B1z2.00         | Malignant neoplasm, overlapping lesion of digestive system   | Gastro-intestinal cancer |
| 56918          | B1zy.00         | Malignant neoplasm other spec digestive tract and peritoneum | Gastro-intestinal cancer |
| 51255          | B1zz.00         | Malignant neoplasm of digestive tract and peritoneum NOS     | Gastro-intestinal cancer |
| 8244           | B801.00         | Carcinoma in situ of oesophagus                              | Gastro-intestinal cancer |
| 99155          | B801000         | Carcinoma in situ of upper 1/3 oesophagus                    | Gastro-intestinal cancer |
| 64274          | B801100         | Carcinoma in situ of middle 1/3 oesophagus                   | Gastro-intestinal cancer |
| 56077          | B801200         | Carcinoma in situ of lower 1/3 oesophagus                    | Gastro-intestinal cancer |
| 44228          | B801z00         | Carcinoma in situ of oesophagus NOS                          | Gastro-intestinal cancer |
| 17093          | B802.00         | Carcinoma in situ of stomach                                 | Gastro-intestinal cancer |
| 17258          | B802000         | Carcinoma in situ of cardia of stomach                       | Gastro-intestinal cancer |
| 72947          | B802100         | Carcinoma in situ of fundus of stomach                       | Gastro-intestinal cancer |

| <b>Medcode</b> | <b>Readcode</b> | <b>Description</b>                                          | <b>Cancer type</b>       |
|----------------|-----------------|-------------------------------------------------------------|--------------------------|
| 63087          | B802200         | Carcinoma in situ of body of stomach                        | Gastro-intestinal cancer |
| 51748          | B802300         | Carcinoma in situ of pyloric antrum                         | Gastro-intestinal cancer |
| 58883          | B802400         | Carcinoma in situ of pyloric canal                          | Gastro-intestinal cancer |
| 37774          | B802z00         | Carcinoma in situ of stomach NOS                            | Gastro-intestinal cancer |
| 6903           | B803.00         | Carcinoma in situ of colon                                  | Gastro-intestinal cancer |
| 39080          | B803000         | Carcinoma in situ of hepatic flexure of colon               | Gastro-intestinal cancer |
| 37125          | B803100         | Carcinoma in situ of transverse colon                       | Gastro-intestinal cancer |
| 47667          | B803200         | Carcinoma in situ of descending colon                       | Gastro-intestinal cancer |
| 17144          | B803300         | Carcinoma in situ of sigmoid colon                          | Gastro-intestinal cancer |
| 16916          | B803400         | Carcinoma in situ of caecum                                 | Gastro-intestinal cancer |
| 47656          | B803500         | Carcinoma in situ of appendix                               | Gastro-intestinal cancer |
| 31893          | B803600         | Carcinoma in situ of ascending colon                        | Gastro-intestinal cancer |
| 22699          | B803700         | Carcinoma in situ of splenic flexure of colon               | Gastro-intestinal cancer |
| 105228         | B803800         | High grade dysplasia of colon                               | Gastro-intestinal cancer |
| 33561          | B803z00         | Carcinoma in situ of colon NOS                              | Gastro-intestinal cancer |
| 60477          | B804.00         | Carcinoma in situ of rectum and rectosigmoid junction       | Gastro-intestinal cancer |
| 27811          | B804000         | Carcinoma in situ of rectosigmoid junction                  | Gastro-intestinal cancer |
| 29975          | B804100         | Carcinoma in situ of rectum                                 | Gastro-intestinal cancer |
| 38883          | B804z00         | Carcinoma in situ of rectum or rectosigmoid junction NOS    | Gastro-intestinal cancer |
| 51054          | B805.00         | Carcinoma in situ of anal canal                             | Gastro-intestinal cancer |
| 34094          | B805000         | Anal intraepithelial neoplasia grade III                    | Gastro-intestinal cancer |
| 12273          | B806.00         | Carcinoma in situ of anus NOS                               | Gastro-intestinal cancer |
| 22392          | B807.00         | Carcinoma in situ of other and unspecified small intestine  | Gastro-intestinal cancer |
| 45070          | B807000         | Carcinoma in situ of duodenum                               | Gastro-intestinal cancer |
| 63804          | B807100         | Carcinoma in situ of jejunum                                | Gastro-intestinal cancer |
| 45217          | B807200         | Carcinoma in situ of ileum                                  | Gastro-intestinal cancer |
| 100183         | B807300         | Carcinoma in situ of Meckel's diverticulum                  | Gastro-intestinal cancer |
| 70728          | B807z00         | Carcinoma in situ other and unspecified small intestine NOS | Gastro-intestinal cancer |
| 35180          | Byu1.00         | [X]Malignant neoplasm of digestive organs                   | Gastro-intestinal cancer |
| 45766          | Byu1200         | [X]Malignant neoplasm of intestinal tract, part unspecified | Gastro-intestinal cancer |

| <b>Medcode</b> | <b>Readcode</b> | <b>Description</b>                                            | <b>Cancer type</b>                   |
|----------------|-----------------|---------------------------------------------------------------|--------------------------------------|
| 49292          | Byu1300         | [X]Malignant neoplasm/ill-defin sites within digestive system | Gastro-intestinal cancer             |
| 102708         | ByuF100         | [X]Carcinoma in situ of other specified digestive organs      | Gastro-intestinal cancer             |
| 8918           | B15..00         | Malignant neoplasm of liver and intrahepatic bile ducts       | Liver and and biliopancreatic cancer |
| 25535          | B150.00         | Primary malignant neoplasm of liver                           | Liver and and biliopancreatic cancer |
| 16126          | B150000         | Primary carcinoma of liver                                    | Liver and and biliopancreatic cancer |
| 31210          | B150100         | Hepatoblastoma of liver                                       | Liver and and biliopancreatic cancer |
| 68410          | B150200         | Primary angiosarcoma of liver                                 | Liver and and biliopancreatic cancer |
| 22187          | B150300         | Hepatocellular carcinoma                                      | Liver and and biliopancreatic cancer |
| 44399          | B150z00         | Primary malignant neoplasm of liver NOS                       | Liver and and biliopancreatic cancer |
| 16915          | B151.00         | Malignant neoplasm of intrahepatic bile ducts                 | Liver and and biliopancreatic cancer |
| 65124          | B151000         | Malignant neoplasm of interlobular bile ducts                 | Liver and and biliopancreatic cancer |
| 89593          | B151200         | Malignant neoplasm of intrahepatic biliary passages           | Liver and and biliopancreatic cancer |
| 58088          | B151400         | Malignant neoplasm of intrahepatic gall duct                  | Liver and and biliopancreatic cancer |
| 61643          | B151z00         | Malignant neoplasm of intrahepatic bile ducts NOS             | Liver and and biliopancreatic cancer |
| 26393          | B152.00         | Malignant neoplasm of liver unspecified                       | Liver and and biliopancreatic cancer |
| 36147          | B153.00         | Secondary malignant neoplasm of liver                         | Liver and and biliopancreatic cancer |
| 38978          | B15z.00         | Malignant neoplasm of liver and intrahepatic bile ducts NOS   | Liver and and biliopancreatic cancer |
| 54103          | B16..00         | Malignant neoplasm gallbladder and extrahepatic bile ducts    | Liver and and biliopancreatic cancer |
| 16105          | B160.00         | Malignant neoplasm of gallbladder                             | Liver and and biliopancreatic cancer |
| 31393          | B160.11         | Carcinoma gallbladder                                         | Liver and and biliopancreatic cancer |
| 23433          | B161.00         | Malignant neoplasm of extrahepatic bile ducts                 | Liver and and biliopancreatic cancer |
| 72445          | B161000         | Malignant neoplasm of cystic duct                             | Liver and and biliopancreatic cancer |
| 52537          | B161100         | Malignant neoplasm of hepatic duct                            | Liver and and biliopancreatic cancer |
| 7982           | B161200         | Malignant neoplasm of common bile duct                        | Liver and and biliopancreatic cancer |
| 36495          | B161211         | Carcinoma common bile duct                                    | Liver and and biliopancreatic cancer |
| 105613         | B161300         | Malignant neoplasm of sphincter of Oddi                       | Liver and and biliopancreatic cancer |
| 74896          | B161z00         | Malignant neoplasm of extrahepatic bile ducts NOS             | Liver and and biliopancreatic cancer |
| 10949          | B162.00         | Malignant neoplasm of ampulla of Vater                        | Liver and and biliopancreatic cancer |
| 35039          | B163.00         | Malignant neoplasm, overlapping lesion of biliary tract       | Liver and and biliopancreatic cancer |
| 60312          | B16y.00         | Malignant neoplasm other gallbladder/extrahepatic bile duct   | Liver and and biliopancreatic cancer |

| <b>Medcode</b> | <b>Readcode</b> | <b>Description</b>                                          | <b>Cancer type</b>                   |
|----------------|-----------------|-------------------------------------------------------------|--------------------------------------|
| 15907          | B16z.00         | Malignant neoplasm gallbladder/extrahepatic bile ducts NOS  | Liver and and biliopancreatic cancer |
| 8166           | B17..00         | Malignant neoplasm of pancreas                              | Liver and and biliopancreatic cancer |
| 8771           | B170.00         | Malignant neoplasm of head of pancreas                      | Liver and and biliopancreatic cancer |
| 40810          | B171.00         | Malignant neoplasm of body of pancreas                      | Liver and and biliopancreatic cancer |
| 39870          | B172.00         | Malignant neoplasm of tail of pancreas                      | Liver and and biliopancreatic cancer |
| 35535          | B173.00         | Malignant neoplasm of pancreatic duct                       | Liver and and biliopancreatic cancer |
| 35795          | B174.00         | Malignant neoplasm of Islets of Langerhans                  | Liver and and biliopancreatic cancer |
| 97875          | B175.00         | Malignant neoplasm, overlapping lesion of pancreas          | Liver and and biliopancreatic cancer |
| 109782         | B176.00         | Somatostatinoma of pancreas                                 | Liver and and biliopancreatic cancer |
| 48537          | B17y.00         | Malignant neoplasm of other specified sites of pancreas     | Liver and and biliopancreatic cancer |
| 96635          | B17y000         | Malignant neoplasm of ectopic pancreatic tissue             | Liver and and biliopancreatic cancer |
| 95783          | B17yz00         | Malignant neoplasm of specified site of pancreas NOS        | Liver and and biliopancreatic cancer |
| 34388          | B17z.00         | Malignant neoplasm of pancreas NOS                          | Liver and and biliopancreatic cancer |
| 66673          | B808.00         | Carcinoma in situ of liver and biliary system               | Liver and and biliopancreatic cancer |
| 51934          | B808.11         | Carcinoma in situ of biliary system                         | Liver and and biliopancreatic cancer |
| 25310          | B808000         | Carcinoma in situ of liver                                  | Liver and and biliopancreatic cancer |
| 99580          | B808100         | Carcinoma in situ of intrahepatic bile ducts                | Liver and and biliopancreatic cancer |
| 37501          | B808200         | Carcinoma in situ of hepatic duct                           | Liver and and biliopancreatic cancer |
| 46594          | B808300         | Carcinoma in situ of gall bladder                           | Liver and and biliopancreatic cancer |
| 73164          | B808400         | Carcinoma in situ of cystic duct                            | Liver and and biliopancreatic cancer |
| 64089          | B808500         | Carcinoma in situ of common bile duct                       | Liver and and biliopancreatic cancer |
| 21792          | B808600         | Carcinoma in situ of ampulla of Vater                       | Liver and and biliopancreatic cancer |
| 98540          | B808z00         | Carcinoma in situ of liver or biliary system NOS            | Liver and and biliopancreatic cancer |
| 44166          | B80z.00         | Carcinoma in situ of other and unspecified digestive organs | Liver and and biliopancreatic cancer |
| 16931          | B80z000         | Carcinoma in situ of pancreas                               | Liver and and biliopancreatic cancer |
| 43490          | Byu1100         | [X]Other specified carcinomas of liver                      | Liver and and biliopancreatic cancer |
| 108667         | B1z1000         | Angiosarcoma of spleen                                      | Connective tissue cancer             |
| 72224          | B1z1100         | Fibrosarcoma of spleen                                      | Connective tissue cancer             |
| 12539          | B3...12         | Sarcoma of bone and connective tissue                       | Connective tissue cancer             |
| 18314          | B30..00         | Malignant neoplasm of bone and articular cartilage          | Connective tissue cancer             |

| <b>Medcode</b> | <b>Readcode</b> | <b>Description</b>                                | <b>Cancer type</b>       |
|----------------|-----------------|---------------------------------------------------|--------------------------|
| 5062           | B30..11         | Chondroma                                         | Connective tissue cancer |
| 29735          | B30..12         | Osteoma                                           | Connective tissue cancer |
| 59036          | B300.00         | Malignant neoplasm of bones of skull and face     | Connective tissue cancer |
| 53594          | B300000         | Malignant neoplasm of ethmoid bone                | Connective tissue cancer |
| 53599          | B300100         | Malignant neoplasm of frontal bone                | Connective tissue cancer |
| 59520          | B300200         | Malignant neoplasm of malar bone                  | Connective tissue cancer |
| 95458          | B300300         | Malignant neoplasm of nasal bone                  | Connective tissue cancer |
| 55953          | B300400         | Malignant neoplasm of occipital bone              | Connective tissue cancer |
| 50298          | B300500         | Malignant neoplasm of orbital bone                | Connective tissue cancer |
| 54747          | B300600         | Malignant neoplasm of parietal bone               | Connective tissue cancer |
| 55595          | B300700         | Malignant neoplasm of sphenoid bone               | Connective tissue cancer |
| 62104          | B300800         | Malignant neoplasm of temporal bone               | Connective tissue cancer |
| 50299          | B300900         | Malignant neoplasm of zygomatic bone              | Connective tissue cancer |
| 17475          | B300A00         | Malignant neoplasm of maxilla                     | Connective tissue cancer |
| 96445          | B300B00         | Malignant neoplasm of turbinate                   | Connective tissue cancer |
| 44452          | B300C00         | Malignant neoplasm of vomer                       | Connective tissue cancer |
| 69146          | B300z00         | Malignant neoplasm of bones of skull and face NOS | Connective tissue cancer |
| 33833          | B301.00         | Malignant neoplasm of mandible                    | Connective tissue cancer |
| 16704          | B302.00         | Malignant neoplasm of vertebral column            | Connective tissue cancer |
| 46939          | B302000         | Malignant neoplasm of cervical vertebra           | Connective tissue cancer |
| 32372          | B302100         | Malignant neoplasm of thoracic vertebra           | Connective tissue cancer |
| 54691          | B302200         | Malignant neoplasm of lumbar vertebra             | Connective tissue cancer |
| 49701          | B302z00         | Malignant neoplasm of vertebral column NOS        | Connective tissue cancer |
| 27528          | B303.00         | Malignant neoplasm of ribs, sternum and clavicle  | Connective tissue cancer |
| 37842          | B303000         | Malignant neoplasm of rib                         | Connective tissue cancer |
| 49491          | B303100         | Malignant neoplasm of sternum                     | Connective tissue cancer |
| 66639          | B303200         | Malignant neoplasm of clavicle                    | Connective tissue cancer |
| 60403          | B303300         | Malignant neoplasm of costal cartilage            | Connective tissue cancer |
| 67763          | B303400         | Malignant neoplasm of costo-vertebral joint       | Connective tissue cancer |
| 54493          | B303500         | Malignant neoplasm of xiphoid process             | Connective tissue cancer |

| <b>Medcode</b> | <b>Readcode</b> | <b>Description</b>                                        | <b>Cancer type</b>       |
|----------------|-----------------|-----------------------------------------------------------|--------------------------|
| 51237          | B303z00         | Malignant neoplasm of rib, sternum and clavicle NOS       | Connective tissue cancer |
| 71810          | B304.00         | Malignant neoplasm of scapula and long bones of upper arm | Connective tissue cancer |
| 49054          | B304000         | Malignant neoplasm of scapula                             | Connective tissue cancer |
| 105797         | B304100         | Malignant neoplasm of acromion                            | Connective tissue cancer |
| 61741          | B304200         | Malignant neoplasm of humerus                             | Connective tissue cancer |
| 92371          | B304300         | Malignant neoplasm of radius                              | Connective tissue cancer |
| 64848          | B304400         | Malignant neoplasm of ulna                                | Connective tissue cancer |
| 65880          | B304z00         | Malig neop of scapula and long bones of upper arm NOS     | Connective tissue cancer |
| 73530          | B305.00         | Malignant neoplasm of hand bones                          | Connective tissue cancer |
| 106069         | B305.11         | Malignant neoplasm of carpal bones                        | Connective tissue cancer |
| 72464          | B305.12         | Malignant neoplasm of metacarpal bones                    | Connective tissue cancer |
| 57988          | B305000         | Malignant neoplasm of carpal bone-scaploid                | Connective tissue cancer |
| 69104          | B305100         | Malignant neoplasm of carpal bone-lunate                  | Connective tissue cancer |
| 108638         | B305A00         | Malignant neoplasm of third metacarpal bone               | Connective tissue cancer |
| 94427          | B305C00         | Malignant neoplasm of fifth metacarpal bone               | Connective tissue cancer |
| 86812          | B305D00         | Malignant neoplasm of phalanges of hand                   | Connective tissue cancer |
| 73556          | B305z00         | Malignant neoplasm of hand bones NOS                      | Connective tissue cancer |
| 54631          | B306.00         | Malignant neoplasm of pelvic bones, sacrum and coccyx     | Connective tissue cancer |
| 44609          | B306000         | Malignant neoplasm of ilium                               | Connective tissue cancer |
| 59223          | B306100         | Malignant neoplasm of ischium                             | Connective tissue cancer |
| 51921          | B306200         | Malignant neoplasm of pubis                               | Connective tissue cancer |
| 40966          | B306300         | Malignant neoplasm of sacral vertebra                     | Connective tissue cancer |
| 66908          | B306400         | Malignant neoplasm of coccygeal vertebra                  | Connective tissue cancer |
| 50152          | B306500         | Malignant sacral teratoma                                 | Connective tissue cancer |
| 38938          | B306z00         | Malignant neoplasm of pelvis, sacrum or coccyx NOS        | Connective tissue cancer |
| 68055          | B307.00         | Malignant neoplasm of long bones of leg                   | Connective tissue cancer |
| 56513          | B307000         | Malignant neoplasm of femur                               | Connective tissue cancer |
| 50402          | B307100         | Malignant neoplasm of fibula                              | Connective tissue cancer |
| 40814          | B307200         | Malignant neoplasm of tibia                               | Connective tissue cancer |
| 62630          | B307z00         | Malignant neoplasm of long bones of leg NOS               | Connective tissue cancer |



| <b>Medcode</b> | <b>Readcode</b> | <b>Description</b>                                           | <b>Cancer type</b>       |
|----------------|-----------------|--------------------------------------------------------------|--------------------------|
| 105475         | B308.00         | Malignant neoplasm of short bones of leg                     | Connective tissue cancer |
| 95182          | B308100         | Malignant neoplasm of talus                                  | Connective tissue cancer |
| 72212          | B308200         | Malignant neoplasm of calcaneum                              | Connective tissue cancer |
| 34878          | B308300         | Malignant neoplasm of medial cuneiform                       | Connective tissue cancer |
| 69927          | B308800         | Malignant neoplasm of first metatarsal bone                  | Connective tissue cancer |
| 92382          | B308B00         | Malignant neoplasm of fourth metatarsal bone                 | Connective tissue cancer |
| 58949          | B308D00         | Malignant neoplasm of phalanges of foot                      | Connective tissue cancer |
| 103354         | B308z00         | Malignant neoplasm of short bones of leg NOS                 | Connective tissue cancer |
| 67451          | B30W.00         | Malignant neoplasm/overlap lesion/bone+articulr cartilage    | Connective tissue cancer |
| 43614          | B30X.00         | Malignant neoplasm/bones+articular cartilage/limb,unspfd     | Connective tissue cancer |
| 16075          | B30z.00         | Malignant neoplasm of bone and articular cartilage NOS       | Connective tissue cancer |
| 19437          | B30z000         | Osteosarcoma                                                 | Connective tissue cancer |
| 34451          | B31..00         | Malignant neoplasm of connective and other soft tissue       | Connective tissue cancer |
| 43475          | B310.00         | Malig neop of connective and soft tissue head, face and neck | Connective tissue cancer |
| 59382          | B310000         | Malignant neoplasm of soft tissue of head                    | Connective tissue cancer |
| 40014          | B310100         | Malignant neoplasm of soft tissue of face                    | Connective tissue cancer |
| 48517          | B310200         | Malignant neoplasm of soft tissue of neck                    | Connective tissue cancer |
| 60035          | B310300         | Malignant neoplasm of cartilage of ear                       | Connective tissue cancer |
| 49463          | B310400         | Malignant neoplasm of tarsus of eyelid                       | Connective tissue cancer |
| 108389         | B310500         | Malignant neoplasm soft tissues of cervical spine            | Connective tissue cancer |
| 73718          | B310z00         | Malig neop connective and soft tissue head, face, neck NOS   | Connective tissue cancer |
| 53989          | B311.00         | Malig neop connective and soft tissue upper limb/shoulder    | Connective tissue cancer |
| 50222          | B311000         | Malignant neoplasm of connective and soft tissue of shoulder | Connective tissue cancer |
| 64345          | B311100         | Malignant neoplasm of connective and soft tissue, upper arm  | Connective tissue cancer |
| 57482          | B311200         | Malignant neoplasm of connective and soft tissue of fore-arm | Connective tissue cancer |
| 19321          | B311300         | Malignant neoplasm of connective and soft tissue of hand     | Connective tissue cancer |
| 91586          | B311400         | Malignant neoplasm of connective and soft tissue of finger   | Connective tissue cancer |
| 63988          | B311500         | Malignant neoplasm of connective and soft tissue of thumb    | Connective tissue cancer |
| 104913         | B311z00         | Malig neop connective soft tissue upper limb/shoulder NOS    | Connective tissue cancer |
| 66088          | B312.00         | Malig neop of connective and soft tissue of hip and leg      | Connective tissue cancer |

| <b>Medcode</b> | <b>Readcode</b> | <b>Description</b>                                           | <b>Cancer type</b>       |
|----------------|-----------------|--------------------------------------------------------------|--------------------------|
| 102949         | B312000         | Malignant neoplasm of connective and soft tissue of hip      | Connective tissue cancer |
| 44805          | B312100         | Malig neop of connective and soft tissue thigh and upper leg | Connective tissue cancer |
| 54965          | B312200         | Malig neop connective and soft tissue of popliteal space     | Connective tissue cancer |
| 30542          | B312300         | Malig neop of connective and soft tissue of lower leg        | Connective tissue cancer |
| 54222          | B312400         | Malignant neoplasm of connective and soft tissue of foot     | Connective tissue cancer |
| 99572          | B312500         | Malignant neoplasm of connective and soft tissue of toe      | Connective tissue cancer |
| 90546          | B312z00         | Malig neop connective and soft tissue hip and leg NOS        | Connective tissue cancer |
| 22290          | B313.00         | Malignant neoplasm of connective and soft tissue of thorax   | Connective tissue cancer |
| 29160          | B313000         | Malignant neoplasm of connective and soft tissue of axilla   | Connective tissue cancer |
| 54186          | B313100         | Malignant neoplasm of diaphragm                              | Connective tissue cancer |
| 72522          | B313200         | Malignant neoplasm of great vessels                          | Connective tissue cancer |
| 104139         | B313300         | Malig neoplasm of connective and soft tissues of thor spine  | Connective tissue cancer |
| 98408          | B313z00         | Malig neop of connective and soft tissue of thorax NOS       | Connective tissue cancer |
| 45071          | B314.00         | Malignant neoplasm of connective and soft tissue of abdomen  | Connective tissue cancer |
| 66488          | B314000         | Malig neop of connective and soft tissue of abdominal wall   | Connective tissue cancer |
| 94272          | B314100         | Malig neoplasm of connective and soft tissues of lumb spine  | Connective tissue cancer |
| 60247          | B314z00         | Malig neop of connective and soft tissue of abdomen NOS      | Connective tissue cancer |
| 51965          | B315.00         | Malignant neoplasm of connective and soft tissue of pelvis   | Connective tissue cancer |
| 70463          | B315000         | Malignant neoplasm of connective and soft tissue of buttock  | Connective tissue cancer |
| 67324          | B315100         | Malig neop of connective and soft tissue of inguinal region  | Connective tissue cancer |
| 59152          | B315200         | Malignant neoplasm of connective and soft tissue of perineum | Connective tissue cancer |
| 110192         | B315300         | Malig neopl of connective and soft tissue-sacrum or coccyx   | Connective tissue cancer |
| 58836          | B315z00         | Malig neop of connective and soft tissue of pelvis NOS       | Connective tissue cancer |
| 57471          | B316.00         | Malig neop of connective and soft tissue trunk unspecified   | Connective tissue cancer |
| 65233          | B31y.00         | Malig neop connective and soft tissue other specified site   | Connective tissue cancer |
| 15182          | B31z.00         | Malignant neoplasm of connective and soft tissue, site NOS   | Connective tissue cancer |
| 104128         | B31z000         | Kaposi's sarcoma of soft tissue                              | Connective tissue cancer |
| 27931          | B33z000         | Kaposi's sarcoma of skin                                     | Connective tissue cancer |
| 40749          | Byu3.00         | [X]Malignant neoplasm of bone and articular cartilage        | Connective tissue cancer |
| 73296          | Byu3100         | [X]Malignant neoplasm/bones+articular cartilage/limb,unspfd  | Connective tissue cancer |

| <b>Medcode</b> | <b>Readcode</b> | <b>Description</b>                                           | <b>Cancer type</b>       |
|----------------|-----------------|--------------------------------------------------------------|--------------------------|
| 63300          | Byu3200         | [X]Malignant neoplasm/overlap lesion/bone+articlur cartilage | Connective tissue cancer |
| 43151          | Byu3300         | [X]Malignant neoplasm/bone+articular cartilage, unspecified  | Connective tissue cancer |
| 4632           | B33..00         | Other malignant neoplasm of skin                             | Non melanoma skin cancer |
| 876            | B33..11         | Basal cell carcinoma                                         | Non melanoma skin cancer |
| 5034           | B33..12         | Epithelioma                                                  | Non melanoma skin cancer |
| 1940           | B33..13         | Rodent ulcer                                                 | Non melanoma skin cancer |
| 37016          | B33..14         | Malignant neoplasm of sebaceous gland                        | Non melanoma skin cancer |
| 40443          | B33..15         | Malignant neoplasm of sweat gland                            | Non melanoma skin cancer |
| 3445           | B33..16         | Epithelioma basal cell                                       | Non melanoma skin cancer |
| 18245          | B330.00         | Malignant neoplasm of skin of lip                            | Non melanoma skin cancer |
| 43087          | B331.00         | Malignant neoplasm of eyelid including canthus               | Non melanoma skin cancer |
| 36731          | B331000         | Malignant neoplasm of canthus                                | Non melanoma skin cancer |
| 55550          | B331100         | Malignant neoplasm of upper eyelid                           | Non melanoma skin cancer |
| 41958          | B331200         | Malignant neoplasm of lower eyelid                           | Non melanoma skin cancer |
| 53515          | B332.00         | Malignant neoplasm skin of ear and external auricular canal  | Non melanoma skin cancer |
| 33997          | B332000         | Malignant neoplasm of skin of auricle (ear)                  | Non melanoma skin cancer |
| 62080          | B332100         | Malignant neoplasm of skin of external auditory meatus       | Non melanoma skin cancer |
| 33271          | B332200         | Malignant neoplasm of pinna NEC                              | Non melanoma skin cancer |
| 62399          | B332z00         | Malig neop skin of ear and external auricular canal NOS      | Non melanoma skin cancer |
| 27370          | B333.00         | Malignant neoplasm skin of other and unspecified parts face  | Non melanoma skin cancer |
| 30645          | B333000         | Malignant neoplasm of skin of cheek, external                | Non melanoma skin cancer |
| 49403          | B333100         | Malignant neoplasm of skin of chin                           | Non melanoma skin cancer |
| 55670          | B333200         | Malignant neoplasm of skin of eyebrow                        | Non melanoma skin cancer |
| 30576          | B333300         | Malignant neoplasm of skin of forehead                       | Non melanoma skin cancer |
| 16202          | B333400         | Malignant neoplasm of skin of nose (external)                | Non melanoma skin cancer |
| 21327          | B333500         | Malignant neoplasm of skin of temple                         | Non melanoma skin cancer |
| 46008          | B333z00         | Malignant neoplasm skin other and unspec part of face NOS    | Non melanoma skin cancer |
| 54234          | B334.00         | Malignant neoplasm of scalp and skin of neck                 | Non melanoma skin cancer |
| 37165          | B334000         | Malignant neoplasm of scalp                                  | Non melanoma skin cancer |
| 43619          | B334100         | Malignant neoplasm of skin of neck                           | Non melanoma skin cancer |

| <b>Medcode</b> | <b>Readcode</b> | <b>Description</b>                                          | <b>Cancer type</b>       |
|----------------|-----------------|-------------------------------------------------------------|--------------------------|
| 73760          | B334z00         | Malignant neoplasm of scalp or skin of neck NOS             | Non melanoma skin cancer |
| 57446          | B335.00         | Malignant neoplasm of skin of trunk, excluding scrotum      | Non melanoma skin cancer |
| 70380          | B335000         | Malignant neoplasm of skin of axillary fold                 | Non melanoma skin cancer |
| 37969          | B335100         | Malignant neoplasm of skin of chest, excluding breast       | Non melanoma skin cancer |
| 30543          | B335200         | Malignant neoplasm of skin of breast                        | Non melanoma skin cancer |
| 18618          | B335300         | Malignant neoplasm of skin of abdominal wall                | Non melanoma skin cancer |
| 67748          | B335400         | Malignant neoplasm of skin of umbilicus                     | Non melanoma skin cancer |
| 66319          | B335500         | Malignant neoplasm of skin of groin                         | Non melanoma skin cancer |
| 46458          | B335600         | Malignant neoplasm of skin of perineum                      | Non melanoma skin cancer |
| 45077          | B335700         | Malignant neoplasm of skin of back                          | Non melanoma skin cancer |
| 62305          | B335800         | Malignant neoplasm of skin of buttock                       | Non melanoma skin cancer |
| 23480          | B335900         | Malignant neoplasm of perianal skin                         | Non melanoma skin cancer |
| 66447          | B335A00         | Malignant neoplasm of skin of scapular region               | Non melanoma skin cancer |
| 15868          | B335z00         | Malignant neoplasm of skin of trunk, excluding scrotum, NOS | Non melanoma skin cancer |
| 30747          | B336.00         | Malignant neoplasm of skin of upper limb and shoulder       | Non melanoma skin cancer |
| 43122          | B336000         | Malignant neoplasm of skin of shoulder                      | Non melanoma skin cancer |
| 42707          | B336100         | Malignant neoplasm of skin of upper arm                     | Non melanoma skin cancer |
| 30577          | B336200         | Malignant neoplasm of skin of fore-arm                      | Non melanoma skin cancer |
| 54352          | B336300         | Malignant neoplasm of skin of hand                          | Non melanoma skin cancer |
| 25245          | B336400         | Malignant neoplasm of skin of finger                        | Non melanoma skin cancer |
| 64406          | B336500         | Malignant neoplasm of skin of thumb                         | Non melanoma skin cancer |
| 60526          | B336z00         | Malignant neoplasm of skin of upper limb or shoulder NOS    | Non melanoma skin cancer |
| 57442          | B337.00         | Malignant neoplasm of skin of lower limb and hip            | Non melanoma skin cancer |
| 70988          | B337000         | Malignant neoplasm of skin of hip                           | Non melanoma skin cancer |
| 58601          | B337100         | Malignant neoplasm of skin of thigh                         | Non melanoma skin cancer |
| 56954          | B337200         | Malignant neoplasm of skin of knee                          | Non melanoma skin cancer |
| 68197          | B337300         | Malignant neoplasm of skin of popliteal fossa area          | Non melanoma skin cancer |
| 33682          | B337400         | Malignant neoplasm of skin of lower leg                     | Non melanoma skin cancer |
| 64270          | B337500         | Malignant neoplasm of skin of ankle                         | Non melanoma skin cancer |
| 104025         | B337600         | Malignant neoplasm of skin of heel                          | Non melanoma skin cancer |

| <b>Medcode</b> | <b>Readcode</b> | <b>Description</b>                                         | <b>Cancer type</b>       |
|----------------|-----------------|------------------------------------------------------------|--------------------------|
| 70587          | B337700         | Malignant neoplasm of skin of foot                         | Non melanoma skin cancer |
| 65782          | B337800         | Malignant neoplasm of skin of toe                          | Non melanoma skin cancer |
| 67914          | B337900         | Malignant neoplasm of skin of great toe                    | Non melanoma skin cancer |
| 61194          | B337z00         | Malignant neoplasm of skin of lower limb or hip NOS        | Non melanoma skin cancer |
| 93352          | B338.00         | Squamous cell carcinoma of skin                            | Non melanoma skin cancer |
| 24375          | B339.00         | Dermatofibrosarcoma protuberans                            | Non melanoma skin cancer |
| 42429          | B33X.00         | Malignant neoplasm overlapping lesion of skin              | Non melanoma skin cancer |
| 18354          | B33y.00         | Malignant neoplasm of other specified skin sites           | Non melanoma skin cancer |
| 2492           | B33z.00         | Malignant neoplasm of skin NOS                             | Non melanoma skin cancer |
| 93490          | B33z.11         | Squamous cell carcinoma of skin NOS                        | Non melanoma skin cancer |
| 12084          | B82..00         | Carcinoma in situ of skin                                  | Non melanoma skin cancer |
| 63957          | B820.00         | Carcinoma in situ of skin of lip                           | Non melanoma skin cancer |
| 57550          | B821.00         | Carcinoma in situ of skin of eyelid including canthus      | Non melanoma skin cancer |
| 50189          | B822.00         | Carcinoma in situ skin of ear and external auricular canal | Non melanoma skin cancer |
| 32249          | B822.11         | Carcinoma in situ of ear                                   | Non melanoma skin cancer |
| 59614          | B822000         | Carcinoma in situ of skin of auricle                       | Non melanoma skin cancer |
| 70295          | B822z00         | Carcinoma in situ skin of ear/external auricular canal NOS | Non melanoma skin cancer |
| 49254          | B823.00         | Carcinoma in situ of skin of other parts of face           | Non melanoma skin cancer |
| 47789          | B823000         | Carcinoma in situ of skin of forehead skin                 | Non melanoma skin cancer |
| 69720          | B823100         | Carcinoma in situ of skin of eyebrow                       | Non melanoma skin cancer |
| 61103          | B823300         | Carcinoma in situ of skin of cheek                         | Non melanoma skin cancer |
| 3135           | B823400         | Carcinoma in situ of skin of nose                          | Non melanoma skin cancer |
| 31511          | B823500         | Carcinoma in situ of skin of temple                        | Non melanoma skin cancer |
| 65222          | B823600         | Carcinoma in situ of skin of jaw                           | Non melanoma skin cancer |
| 110614         | B823z00         | Carcinoma in situ of skin of other parts of face NOS       | Non melanoma skin cancer |
| 69345          | B824.00         | Carcinoma in situ of scalp and skin of neck                | Non melanoma skin cancer |
| 19665          | B824000         | Carcinoma in situ of scalp                                 | Non melanoma skin cancer |
| 54140          | B824100         | Carcinoma in situ of skin of neck                          | Non melanoma skin cancer |
| 52328          | B825.00         | Carcinoma in situ of skin of trunk, excluding scrotum      | Non melanoma skin cancer |
| 8647           | B825000         | Carcinoma in situ of skin of breast                        | Non melanoma skin cancer |

| <b>Medcode</b> | <b>Readcode</b> | <b>Description</b>                                         | <b>Cancer type</b>       |
|----------------|-----------------|------------------------------------------------------------|--------------------------|
| 62939          | B825100         | Carcinoma in situ of skin of chest wall NOS                | Non melanoma skin cancer |
| 39390          | B825200         | Carcinoma in situ of skin of axilla                        | Non melanoma skin cancer |
| 38032          | B825300         | Carcinoma in situ of skin of back                          | Non melanoma skin cancer |
| 42212          | B825400         | Carcinoma in situ of skin of abdominal wall                | Non melanoma skin cancer |
| 57358          | B825500         | Carcinoma in situ of skin of groin                         | Non melanoma skin cancer |
| 38777          | B825600         | Carcinoma in situ of skin of perineum                      | Non melanoma skin cancer |
| 61321          | B825700         | Carcinoma in situ of skin of buttock                       | Non melanoma skin cancer |
| 56374          | B825800         | Carcinoma in situ of perianal skin                         | Non melanoma skin cancer |
| 60563          | B825z00         | Carcinoma in situ of skin of trunk NOS                     | Non melanoma skin cancer |
| 46568          | B826.00         | Carcinoma in situ of skin of upper limb and shoulder       | Non melanoma skin cancer |
| 56554          | B826000         | Carcinoma in situ of skin of shoulder                      | Non melanoma skin cancer |
| 57284          | B826100         | Carcinoma in situ of skin of upper arm                     | Non melanoma skin cancer |
| 54790          | B826200         | Carcinoma in situ of skin of lower arm                     | Non melanoma skin cancer |
| 49358          | B826300         | Carcinoma in situ of skin of hand                          | Non melanoma skin cancer |
| 90339          | B826z00         | Carcinoma in situ of skin of upper limb or shoulder NOS    | Non melanoma skin cancer |
| 14815          | B827.00         | Carcinoma in situ of skin of lower limb and hip            | Non melanoma skin cancer |
| 708            | B827.11         | Carcinoma in situ of skin of leg                           | Non melanoma skin cancer |
| 71655          | B827000         | Carcinoma in situ of skin of hip                           | Non melanoma skin cancer |
| 46469          | B827100         | Carcinoma in situ of skin of thigh                         | Non melanoma skin cancer |
| 69601          | B827200         | Carcinoma in situ of skin of knee                          | Non melanoma skin cancer |
| 27542          | B827300         | Carcinoma in situ of skin of lower leg                     | Non melanoma skin cancer |
| 67755          | B827400         | Carcinoma in situ of skin of foot                          | Non melanoma skin cancer |
| 64630          | B827z00         | Carcinoma in situ of skin of lower limb or hip NOS         | Non melanoma skin cancer |
| 865            | B32..00         | Malignant melanoma of skin                                 | Melanoma                 |
| 70637          | B320.00         | Malignant melanoma of lip                                  | Melanoma                 |
| 54632          | B321.00         | Malignant melanoma of eyelid including canthus             | Melanoma                 |
| 57260          | B322.00         | Malignant melanoma of ear and external auricular canal     | Melanoma                 |
| 59061          | B322000         | Malignant melanoma of auricle (ear)                        | Melanoma                 |
| 102145         | B322100         | Malignant melanoma of external auditory meatus             | Melanoma                 |
| 73744          | B322z00         | Malignant melanoma of ear and external auricular canal NOS | Melanoma                 |
| 47252          | B323.00         | Malignant melanoma of other and unspecified parts of face  | Melanoma                 |
| 41278          | B323000         | Malignant melanoma of external surface of cheek            | Melanoma                 |
| 71136          | B323100         | Malignant melanoma of chin                                 | Melanoma                 |
| 47094          | B323200         | Malignant melanoma of eyebrow                              | Melanoma                 |

| <b>Medcode</b> | <b>Readcode</b> | <b>Description</b>                                   | <b>Cancer type</b> |
|----------------|-----------------|------------------------------------------------------|--------------------|
| 68133          | B323300         | Malignant melanoma of forehead                       | Melanoma           |
| 45139          | B323400         | Malignant melanoma of external surface of nose       | Melanoma           |
| 58958          | B323500         | Malignant melanoma of temple                         | Melanoma           |
| 67806          | B323z00         | Malignant melanoma of face NOS                       | Melanoma           |
| 65625          | B324.00         | Malignant melanoma of scalp and neck                 | Melanoma           |
| 55881          | B324000         | Malignant melanoma of scalp                          | Melanoma           |
| 45306          | B324100         | Malignant melanoma of neck                           | Melanoma           |
| 99257          | B324z00         | Malignant melanoma of scalp and neck NOS             | Melanoma           |
| 38689          | B325.00         | Malignant melanoma of trunk (excluding scrotum)      | Melanoma           |
| 49814          | B325000         | Malignant melanoma of axilla                         | Melanoma           |
| 32768          | B325100         | Malignant melanoma of breast                         | Melanoma           |
| 53629          | B325200         | Malignant melanoma of buttock                        | Melanoma           |
| 34259          | B325300         | Malignant melanoma of groin                          | Melanoma           |
| 109002         | B325400         | Malignant melanoma of perianal skin                  | Melanoma           |
| 95629          | B325500         | Malignant melanoma of perineum                       | Melanoma           |
| 43715          | B325600         | Malignant melanoma of umbilicus                      | Melanoma           |
| 43463          | B325700         | Malignant melanoma of back                           | Melanoma           |
| 51209          | B325800         | Malignant melanoma of chest wall                     | Melanoma           |
| 45760          | B325z00         | Malignant melanoma of trunk, excluding scrotum, NOS  | Melanoma           |
| 65164          | B326.00         | Malignant melanoma of upper limb and shoulder        | Melanoma           |
| 50505          | B326000         | Malignant melanoma of shoulder                       | Melanoma           |
| 54685          | B326100         | Malignant melanoma of upper arm                      | Melanoma           |
| 45755          | B326200         | Malignant melanoma of fore-arm                       | Melanoma           |
| 62475          | B326300         | Malignant melanoma of hand                           | Melanoma           |
| 25602          | B326400         | Malignant melanoma of finger                         | Melanoma           |
| 63997          | B326500         | Malignant melanoma of thumb                          | Melanoma           |
| 55292          | B326z00         | Malignant melanoma of upper limb or shoulder NOS     | Melanoma           |
| 46255          | B327.00         | Malignant melanoma of lower limb and hip             | Melanoma           |
| 73536          | B327000         | Malignant melanoma of hip                            | Melanoma           |
| 51873          | B327100         | Malignant melanoma of thigh                          | Melanoma           |
| 54305          | B327200         | Malignant melanoma of knee                           | Melanoma           |
| 39878          | B327300         | Malignant melanoma of popliteal fossa area           | Melanoma           |
| 37872          | B327400         | Malignant melanoma of lower leg                      | Melanoma           |
| 42714          | B327500         | Malignant melanoma of ankle                          | Melanoma           |
| 61246          | B327600         | Malignant melanoma of heel                           | Melanoma           |
| 41490          | B327700         | Malignant melanoma of foot                           | Melanoma           |
| 36899          | B327800         | Malignant melanoma of toe                            | Melanoma           |
| 53369          | B327900         | Malignant melanoma of great toe                      | Melanoma           |
| 64327          | B327z00         | Malignant melanoma of lower limb or hip NOS          | Melanoma           |
| 42153          | B32y.00         | Malignant melanoma of other specified skin site      | Melanoma           |
| 96585          | B32y000         | Overlapping malignant melanoma of skin               | Melanoma           |
| 28556          | B32z.00         | Malignant melanoma of skin NOS                       | Melanoma           |
| 19686          | B828.00         | Melanoma in situ of skin                             | Melanoma           |
| 46536          | B828000         | Melanoma in situ of lip                              | Melanoma           |
| 37108          | B828100         | Melanoma in situ of eyelid, including canthus        | Melanoma           |
| 72032          | B828200         | Melanoma in situ of ear and external auricular canal | Melanoma           |

| <b>Medcode</b> | <b>Readcode</b> | <b>Description</b>                                         | <b>Cancer type</b>   |
|----------------|-----------------|------------------------------------------------------------|----------------------|
| 97858          | B828300         | Melanoma in situ of scalp and neck                         | Melanoma             |
| 59768          | B828400         | Melanoma in situ of trunk                                  | Melanoma             |
| 56694          | B828500         | Melanoma in situ of upper limb, including shoulder         | Melanoma             |
| 47850          | B828600         | Melanoma in situ of lower limb, including hip              | Melanoma             |
| 49572          | B828700         | Melanoma in situ of scalp                                  | Melanoma             |
| 52332          | B828800         | Melanoma in situ of back of hand                           | Melanoma             |
| 71044          | B828900         | Melanoma in situ of back                                   | Melanoma             |
| 54246          | B828W00         | Melanoma in situ, unspecified                              | Melanoma             |
| 61989          | B828X00         | Melanoma in situ of other and unspecified parts of face    | Melanoma             |
| 56925          | Byu4000         | [X]Malignant melanoma of other+unspecified parts of face   | Melanoma             |
| 19444          | Byu4100         | [X]Malignant melanoma of skin, unspecified                 | Melanoma             |
| 97628          | ByuF600         | [X]Melanoma in situ of other sites                         | Melanoma             |
| 73261          | ByuFF00         | [X]Melanoma in situ, unspecified                           | Melanoma             |
| 779            | B49..00         | Malignant neoplasm of urinary bladder                      | Urinary tract cancer |
| 38862          | B490.00         | Malignant neoplasm of trigone of urinary bladder           | Urinary tract cancer |
| 44996          | B491.00         | Malignant neoplasm of dome of urinary bladder              | Urinary tract cancer |
| 35963          | B492.00         | Malignant neoplasm of lateral wall of urinary bladder      | Urinary tract cancer |
| 19162          | B493.00         | Malignant neoplasm of anterior wall of urinary bladder     | Urinary tract cancer |
| 42012          | B494.00         | Malignant neoplasm of posterior wall of urinary bladder    | Urinary tract cancer |
| 41571          | B495.00         | Malignant neoplasm of bladder neck                         | Urinary tract cancer |
| 28241          | B496.00         | Malignant neoplasm of ureteric orifice                     | Urinary tract cancer |
| 42023          | B497.00         | Malignant neoplasm of urachus                              | Urinary tract cancer |
| 105388         | B498.00         | Local recurrence of malignant tumour of urinary bladder    | Urinary tract cancer |
| 36949          | B49y.00         | Malignant neoplasm of other site of urinary bladder        | Urinary tract cancer |
| 47801          | B49y000         | Malignant neoplasm, overlapping lesion of bladder          | Urinary tract cancer |
| 31102          | B49z.00         | Malignant neoplasm of urinary bladder NOS                  | Urinary tract cancer |
| 13559          | B4A..00         | Malig neop of kidney and other unspecified urinary organs  | Urinary tract cancer |
| 18712          | B4A..11         | Renal malignant neoplasm                                   | Urinary tract cancer |
| 1599           | B4A0.00         | Malignant neoplasm of kidney parenchyma                    | Urinary tract cancer |
| 7978           | B4A0000         | Hypernephroma                                              | Urinary tract cancer |
| 12389          | B4A1.00         | Malignant neoplasm of renal pelvis                         | Urinary tract cancer |
| 27540          | B4A1000         | Malignant neoplasm of renal calyces                        | Urinary tract cancer |
| 101608         | B4A1100         | Malignant neoplasm of ureteropelvic junction               | Urinary tract cancer |
| 54184          | B4A1z00         | Malignant neoplasm of renal pelvis NOS                     | Urinary tract cancer |
| 15223          | B4A2.00         | Malignant neoplasm of ureter                               | Urinary tract cancer |
| 15644          | B4A3.00         | Malignant neoplasm of urethra                              | Urinary tract cancer |
| 72174          | B4A4.00         | Malignant neoplasm of paraurethral glands                  | Urinary tract cancer |
| 44884          | B4Ay.00         | Malignant neoplasm of other urinary organs                 | Urinary tract cancer |
| 59286          | B4Ay000         | Malignant neoplasm of overlapping lesion of urinary organs | Urinary tract cancer |
| 29462          | B4Az.00         | Malignant neoplasm of kidney or urinary organs NOS         | Urinary tract cancer |
| 38931          | B4y..00         | Malignant neoplasm of genitourinary organ OS               | Urinary tract cancer |
| 52594          | B4z..00         | Malignant neoplasm of genitourinary organ NOS              | Urinary tract cancer |
| 35113          | Byu9.00         | [X]Malignant neoplasm of urinary tract                     | Urinary tract cancer |
| 45260          | Byu9000         | [X]Malignant neoplasm of urinary organ, unspecified        | Urinary tract cancer |
| 3968           | B34..00         | Malignant neoplasm of female breast                        | Breast cancer        |
| 348            | B34..11         | Ca female breast                                           | Breast cancer        |



| <b>Medcode</b> | <b>Readcode</b> | <b>Description</b>                                          | <b>Cancer type</b> |
|----------------|-----------------|-------------------------------------------------------------|--------------------|
| 26853          | B340.00         | Malignant neoplasm of nipple and areola of female breast    | Breast cancer      |
| 23380          | B340000         | Malignant neoplasm of nipple of female breast               | Breast cancer      |
| 64686          | B340100         | Malignant neoplasm of areola of female breast               | Breast cancer      |
| 59831          | B340z00         | Malignant neoplasm of nipple or areola of female breast NOS | Breast cancer      |
| 31546          | B341.00         | Malignant neoplasm of central part of female breast         | Breast cancer      |
| 29826          | B342.00         | Malignant neoplasm of upper-inner quadrant of female breast | Breast cancer      |
| 45222          | B343.00         | Malignant neoplasm of lower-inner quadrant of female breast | Breast cancer      |
| 23399          | B344.00         | Malignant neoplasm of upper-outer quadrant of female breast | Breast cancer      |
| 42070          | B345.00         | Malignant neoplasm of lower-outer quadrant of female breast | Breast cancer      |
| 20685          | B346.00         | Malignant neoplasm of axillary tail of female breast        | Breast cancer      |
| 49148          | B347.00         | Malignant neoplasm, overlapping lesion of breast            | Breast cancer      |
| 56715          | B34y.00         | Malignant neoplasm of other site of female breast           | Breast cancer      |
| 95057          | B34y000         | Malignant neoplasm of ectopic site of female breast         | Breast cancer      |
| 38475          | B34yz00         | Malignant neoplasm of other site of female breast NOS       | Breast cancer      |
| 9470           | B34z.00         | Malignant neoplasm of female breast NOS                     | Breast cancer      |
| 19423          | B35..00         | Malignant neoplasm of male breast                           | Breast cancer      |
| 54494          | B350.00         | Malignant neoplasm of nipple and areola of male breast      | Breast cancer      |
| 68480          | B350000         | Malignant neoplasm of nipple of male breast                 | Breast cancer      |
| 67884          | B350100         | Malignant neoplasm of areola of male breast                 | Breast cancer      |
| 54202          | B35z.00         | Malignant neoplasm of other site of male breast             | Breast cancer      |
| 95323          | B35z000         | Malignant neoplasm of ectopic site of male breast           | Breast cancer      |
| 48809          | B35zz00         | Malignant neoplasm of male breast NOS                       | Breast cancer      |
| 105488         | B36..00         | Local recurrence of malignant tumour of breast              | Breast cancer      |
| 7833           | B830.00         | Carcinoma in situ of breast                                 | Breast cancer      |
| 10387          | B830000         | Lobular carcinoma in situ of breast                         | Breast cancer      |
| 18694          | B830100         | Intraductal carcinoma in situ of breast                     | Breast cancer      |
| 12499          | Byu6.00         | [X]Malignant neoplasm of breast                             | Breast cancer      |
| 53803          | ByuFG00         | [X]Other carcinoma in situ of breast                        | Breast cancer      |
| 2744           | B40..00         | Malignant neoplasm of uterus, part unspecified              | Gynecologic cancer |
| 2747           | B41..00         | Malignant neoplasm of cervix uteri                          | Gynecologic cancer |
| 3230           | B41..11         | Cervical carcinoma (uterus)                                 | Gynecologic cancer |
| 48820          | B410.00         | Malignant neoplasm of endocervix                            | Gynecologic cancer |
| 57235          | B410000         | Malignant neoplasm of endocervical canal                    | Gynecologic cancer |
| 53103          | B410100         | Malignant neoplasm of endocervical gland                    | Gynecologic cancer |
| 50285          | B410z00         | Malignant neoplasm of endocervix NOS                        | Gynecologic cancer |
| 50297          | B411.00         | Malignant neoplasm of exocervix                             | Gynecologic cancer |
| 58094          | B412.00         | Malignant neoplasm, overlapping lesion of cervix uteri      | Gynecologic cancer |
| 32955          | B41y.00         | Malignant neoplasm of other site of cervix                  | Gynecologic cancer |
| 95505          | B41y000         | Malignant neoplasm of cervical stump                        | Gynecologic cancer |
| 57719          | B41y100         | Malignant neoplasm of squamocolumnar junction of cervix     | Gynecologic cancer |
| 43435          | B41yz00         | Malignant neoplasm of other site of cervix NOS              | Gynecologic cancer |
| 28311          | B41z.00         | Malignant neoplasm of cervix uteri NOS                      | Gynecologic cancer |
| 93762          | B42..00         | Malignant neoplasm of placenta                              | Gynecologic cancer |
| 28003          | B420.00         | Choriocarcinoma                                             | Gynecologic cancer |
| 7046           | B43..00         | Malignant neoplasm of body of uterus                        | Gynecologic cancer |
| 3213           | B430.00         | Malignant neoplasm of corpus uteri, excluding isthmus       | Gynecologic cancer |

| <b>Medcode</b> | <b>Readcode</b> | <b>Description</b>                                           | <b>Cancer type</b> |
|----------------|-----------------|--------------------------------------------------------------|--------------------|
| 72723          | B430000         | Malignant neoplasm of cornu of corpus uteri                  | Gynecologic cancer |
| 68155          | B430100         | Malignant neoplasm of fundus of corpus uteri                 | Gynecologic cancer |
| 2890           | B430200         | Malignant neoplasm of endometrium of corpus uteri            | Gynecologic cancer |
| 49400          | B430211         | Malignant neoplasm of endometrium                            | Gynecologic cancer |
| 45793          | B430300         | Malignant neoplasm of myometrium of corpus uteri             | Gynecologic cancer |
| 45490          | B430z00         | Malignant neoplasm of corpus uteri NOS                       | Gynecologic cancer |
| 43940          | B431.00         | Malignant neoplasm of isthmus of uterine body                | Gynecologic cancer |
| 59097          | B431000         | Malignant neoplasm of lower uterine segment                  | Gynecologic cancer |
| 70729          | B431z00         | Malignant neoplasm of isthmus of uterine body NOS            | Gynecologic cancer |
| 16967          | B432.00         | Malignant neoplasm of overlapping lesion of corpus uteri     | Gynecologic cancer |
| 31608          | B43y.00         | Malignant neoplasm of other site of uterine body             | Gynecologic cancer |
| 33617          | B43z.00         | Malignant neoplasm of body of uterus NOS                     | Gynecologic cancer |
| 19141          | B44..00         | Malignant neoplasm of ovary and other uterine adnexa         | Gynecologic cancer |
| 7805           | B440.00         | Malignant neoplasm of ovary                                  | Gynecologic cancer |
| 1986           | B440.11         | Cancer of ovary                                              | Gynecologic cancer |
| 49828          | B441.00         | Malignant neoplasm of fallopian tube                         | Gynecologic cancer |
| 101778         | B442.00         | Malignant neoplasm of broad ligament                         | Gynecologic cancer |
| 46153          | B443.00         | Malignant neoplasm of parametrium                            | Gynecologic cancer |
| 97996          | B44y.00         | Malignant neoplasm of other site of uterine adnexa           | Gynecologic cancer |
| 65106          | B44z.00         | Malignant neoplasm of uterine adnexa NOS                     | Gynecologic cancer |
| 4555           | B45..00         | Malig neop of other and unspecified female genital organs    | Gynecologic cancer |
| 37328          | B450.00         | Malignant neoplasm of vagina                                 | Gynecologic cancer |
| 10698          | B450100         | Malignant neoplasm of vaginal vault                          | Gynecologic cancer |
| 60772          | B450z00         | Malignant neoplasm of vagina NOS                             | Gynecologic cancer |
| 43761          | B451.00         | Malignant neoplasm of labia majora                           | Gynecologic cancer |
| 47899          | B451000         | Malignant neoplasm of greater vestibular (Bartholin's) gland | Gynecologic cancer |
| 59362          | B451z00         | Malignant neoplasm of labia majora NOS                       | Gynecologic cancer |
| 58061          | B452.00         | Malignant neoplasm of labia minora                           | Gynecologic cancer |
| 53910          | B453.00         | Malignant neoplasm of clitoris                               | Gynecologic cancer |
| 4554           | B454.00         | Malignant neoplasm of vulva unspecified                      | Gynecologic cancer |
| 11991          | B454.11         | Primary vulval cancer                                        | Gynecologic cancer |
| 26454          | B45X.00         | Malignant neoplasm/overlapping lesion/feml genital organs    | Gynecologic cancer |
| 95421          | B45y.00         | Malignant neoplasm of other specified female genital organ   | Gynecologic cancer |
| 27617          | B45y000         | Malignant neoplasm of overlapping lesion of vulva            | Gynecologic cancer |
| 20166          | B45z.00         | Malignant neoplasm of female genital organ NOS               | Gynecologic cancer |
| 3279           | B831.00         | Carcinoma in situ of cervix uteri                            | Gynecologic cancer |
| 4087           | B831.11         | CIN III-carcinoma in situ of cervix                          | Gynecologic cancer |
| 5295           | B831.12         | Cervical intraepithelial neoplasia                           | Gynecologic cancer |
| 21886          | B831.13         | Cervical intraepithelial neoplasia grade III                 | Gynecologic cancer |
| 24228          | B831000         | Carcinoma in situ of endocervix                              | Gynecologic cancer |
| 50126          | B831100         | Carcinoma in situ of exocervix                               | Gynecologic cancer |
| 29898          | B832.00         | Carcinoma in situ of other and unspecified parts of uterus   | Gynecologic cancer |
| 61803          | B832.11         | Carcinoma in situ of body of uterus                          | Gynecologic cancer |
| 7904           | B832000         | Carcinoma in situ of endometrium                             | Gynecologic cancer |
| 44915          | B833.00         | Carcinoma in situ other and unspecified female genital organ | Gynecologic cancer |
| 17137          | B833000         | Carcinoma in situ of ovary                                   | Gynecologic cancer |

| <b>Medcode</b> | <b>Readcode</b> | <b>Description</b>                                           | <b>Cancer type</b>  |
|----------------|-----------------|--------------------------------------------------------------|---------------------|
| 59499          | B833100         | Carcinoma in situ of fallopian tube                          | Gynecologic cancer  |
| 34946          | B833200         | Carcinoma in situ of vagina                                  | Gynecologic cancer  |
| 12119          | B833300         | Carcinoma in situ of vulva                                   | Gynecologic cancer  |
| 3281           | B833311         | Vulval intraepithelial neoplasia                             | Gynecologic cancer  |
| 40598          | Byu7.00         | [X]Malignant neoplasm of female genital organs               | Gynecologic cancer  |
| 64497          | Byu7000         | [X]Malignant neoplasm of uterine adnexa, unspecified         | Gynecologic cancer  |
| 57756          | Byu7100         | [X]Malignant neoplasm/other specified female genital organs  | Gynecologic cancer  |
| 55588          | Byu7300         | [X]Malignant neoplasm of female genital organ, unspecified   | Gynecologic cancer  |
| 72695          | ByuFA00         | [X]Carcinoma in situ of other parts of cervix                | Gynecologic cancer  |
| 15148          | B47..00         | Malignant neoplasm of testis                                 | Male genital cancer |
| 64602          | B470.00         | Malignant neoplasm of undescended testis                     | Male genital cancer |
| 7740           | B470200         | Seminoma of undescended testis                               | Male genital cancer |
| 36325          | B470300         | Teratoma of undescended testis                               | Male genital cancer |
| 96429          | B470z00         | Malignant neoplasm of undescended testis NOS                 | Male genital cancer |
| 19475          | B471.00         | Malignant neoplasm of descended testis                       | Male genital cancer |
| 21786          | B471000         | Seminoma of descended testis                                 | Male genital cancer |
| 9476           | B471100         | Teratoma of descended testis                                 | Male genital cancer |
| 91509          | B471z00         | Malignant neoplasm of descended testis NOS                   | Male genital cancer |
| 38510          | B47z.00         | Malignant neoplasm of testis NOS                             | Male genital cancer |
| 2961           | B47z.11         | Seminoma of testis                                           | Male genital cancer |
| 15989          | B47z.12         | Teratoma of testis                                           | Male genital cancer |
| 3541           | B48..00         | Malignant neoplasm of penis and other male genital organs    | Male genital cancer |
| 50681          | B480.00         | Malignant neoplasm of prepuce (foreskin)                     | Male genital cancer |
| 17841          | B481.00         | Malignant neoplasm of glans penis                            | Male genital cancer |
| 48743          | B482.00         | Malignant neoplasm of body of penis                          | Male genital cancer |
| 43392          | B483.00         | Malignant neoplasm of penis, part unspecified                | Male genital cancer |
| 72127          | B484.00         | Malignant neoplasm of epididymis                             | Male genital cancer |
| 63331          | B485.00         | Malignant neoplasm of spermatic cord                         | Male genital cancer |
| 47767          | B486.00         | Malignant neoplasm of scrotum                                | Male genital cancer |
| 52570          | B487.00         | Malignant neoplasm, overlapping lesion of penis              | Male genital cancer |
| 67949          | B48y.00         | Malignant neoplasm of other male genital organ               | Male genital cancer |
| 68161          | B48y000         | Malignant neoplasm of seminal vesicle                        | Male genital cancer |
| 47668          | B48y100         | Malignant neoplasm of tunica vaginalis                       | Male genital cancer |
| 68824          | B48y200         | Malignant neoplasm, overlapping lesion male genital orgs     | Male genital cancer |
| 92329          | B48yz00         | Malignant neoplasm of other male genital organ NOS           | Male genital cancer |
| 63224          | B48z.00         | Malignant neoplasm of penis and other male genital organ NOS | Male genital cancer |
| 27311          | B835.00         | Carcinoma in situ of penis                                   | Male genital cancer |
| 107958         | B836.00         | Carcinoma in situ other and unspecified male genital organs  | Male genital cancer |
| 8177           | B836000         | Carcinoma in situ of testis                                  | Male genital cancer |
| 58879          | B836300         | Carcinoma in situ of scrotum                                 | Male genital cancer |
| 109831         | B836z00         | Carcinoma in situ of male genital organs NOS                 | Male genital cancer |
| 7187           | B837.00         | Carcinoma in situ of bladder                                 | Male genital cancer |
| 68358          | B83z.00         | Carcinoma in situ of urinary organs NOS                      | Male genital cancer |
| 40671          | Byu8.00         | [X]Malignant neoplasm of male genital organs                 | Male genital cancer |
| 57191          | Byu8000         | [X]Malignant neoplasm/other specified male genital organs    | Male genital cancer |
| 45262          | Byu8200         | [X]Malignant neoplasm of male genital organ, unspecified     | Male genital cancer |

| <b>Medcode</b> | <b>Readcode</b> | <b>Description</b>                                           | <b>Cancer type</b>  |
|----------------|-----------------|--------------------------------------------------------------|---------------------|
| 106003         | ByuFC00         | [X]Carcinoma in situ of oth+unspecified male genital organs  | Male genital cancer |
| 102314         | 1427000         | H/O: prostate cancer                                         | Prostate cancer     |
| 780            | B46..00         | Malignant neoplasm of prostate                               | Prostate cancer     |
| 6328           | B834.00         | Carcinoma in situ of prostate                                | Prostate cancer     |
| 54599          | B834000         | High grade prostatic intraepithelial neoplasia               | Prostate cancer     |
| 105236         | B834100         | Prostatic intraepithelial neoplasia                          | Prostate cancer     |
| 37306          | ZV10415         | [V]Personal history of malignant neoplasm of prostate        | Prostate cancer     |
| 2462           | B61..00         | Hodgkin's disease                                            | Any cancer          |
| 104291         | B61..11         | Hodgkin lymphoma                                             | Any cancer          |
| 65489          | B610.00         | Hodgkin's paraganuloma                                       | Any cancer          |
| 100423         | B610100         | Hodgkin's paraganuloma of lymph nodes of head, face, neck    | Any cancer          |
| 98840          | B610300         | Hodgkin's paraganuloma of intra-abdominal lymph nodes        | Any cancer          |
| 44196          | B611.00         | Hodgkin's granuloma                                          | Any cancer          |
| 98909          | B611100         | Hodgkin's granuloma of lymph nodes of head, face and neck    | Any cancer          |
| 64036          | B612.00         | Hodgkin's sarcoma                                            | Any cancer          |
| 68039          | B612400         | Hodgkin's sarcoma of lymph nodes of axilla and upper limb    | Any cancer          |
| 38939          | B613.00         | Hodgkin's disease, lymphocytic-histiocytic predominance      | Any cancer          |
| 71142          | B613000         | Hodgkin's, lymphocytic-histiocytic predominance unspec site  | Any cancer          |
| 68330          | B613100         | Hodgkin's, lymphocytic-histiocytic pred of head, face, neck  | Any cancer          |
| 92245          | B613200         | Hodgkin's, lymphocytic-histiocytic pred intrathoracic nodes  | Any cancer          |
| 73532          | B613300         | Hodgkin's, lymphocytic-histiocytic pred intra-abdominal node | Any cancer          |
| 93951          | B613500         | Hodgkin's, lymphocytic-histiocytic pred inguinal and leg     | Any cancer          |
| 95338          | B613600         | Hodgkin's, lymphocytic-histiocytic pred intrapelvic nodes    | Any cancer          |
| 106911         | B613700         | Hodgkin's, lymphocytic-histiocytic predominance of spleen    | Any cancer          |
| 104743         | B613800         | Hodgkin's, lymphocytic-histiocytic pred of multiple sites    | Any cancer          |
| 29876          | B613z00         | Hodgkin's, lymphocytic-histiocytic predominance NOS          | Any cancer          |
| 29178          | B614.00         | Hodgkin's disease, nodular sclerosis                         | Any cancer          |
| 57225          | B614000         | Hodgkin's disease, nodular sclerosis of unspecified site     | Any cancer          |
| 55303          | B614100         | Hodgkin's nodular sclerosis of head, face and neck           | Any cancer          |
| 67506          | B614200         | Hodgkin's nodular sclerosis of intrathoracic lymph nodes     | Any cancer          |
| 61149          | B614300         | Hodgkin's nodular sclerosis of intra-abdominal lymph nodes   | Any cancer          |
| 65483          | B614400         | Hodgkin's nodular sclerosis of lymph nodes of axilla and arm | Any cancer          |
| 105472         | B614700         | Hodgkin's disease, nodular sclerosis of spleen               | Any cancer          |
| 19140          | B614800         | Hodgkin's nodular sclerosis of lymph nodes of multiple sites | Any cancer          |
| 63054          | B614z00         | Hodgkin's disease, nodular sclerosis NOS                     | Any cancer          |
| 49605          | B615.00         | Hodgkin's disease, mixed cellularity                         | Any cancer          |
| 97863          | B615000         | Hodgkin's disease, mixed cellularity of unspecified site     | Any cancer          |
| 94407          | B615100         | Hodgkin's mixed cellularity of lymph nodes head, face, neck  | Any cancer          |
| 58684          | B615200         | Hodgkin's mixed cellularity of intrathoracic lymph nodes     | Any cancer          |
| 108886         | B615500         | Hodgkin's mixed cellularity of lymph nodes inguinal and leg  | Any cancer          |
| 94005          | B615z00         | Hodgkin's disease, mixed cellularity NOS                     | Any cancer          |
| 67703          | B616.00         | Hodgkin's disease, lymphocytic depletion                     | Any cancer          |
| 95049          | B616000         | Hodgkin's lymphocytic depletion of unspecified site          | Any cancer          |
| 63625          | B616400         | Hodgkin's lymphocytic depletion lymph nodes axilla and arm   | Any cancer          |
| 110563         | B616500         | Hodgkin's lymphocytic depletion lymph nodes inguinal and leg | Any cancer          |
| 101715         | B616700         | Hodgkin's disease, lymphocytic depletion of spleen           | Any cancer          |

| <b>Medcode</b> | <b>Readcode</b> | <b>Description</b>                                           | <b>Cancer type</b> |
|----------------|-----------------|--------------------------------------------------------------|--------------------|
| 107032         | B616800         | Hodgkin's lymphocytic depletion lymph nodes multiple sites   | Any cancer         |
| 101530         | B616z00         | Hodgkin's disease, lymphocytic depletion NOS                 | Any cancer         |
| 104895         | B617.00         | Nodular lymphocyte predominant Hodgkin lymphoma              | Any cancer         |
| 105841         | B618.00         | Nodular sclerosis classical Hodgkin lymphoma                 | Any cancer         |
| 108775         | B619.00         | Mixed cellularity classical Hodgkin lymphoma                 | Any cancer         |
| 106597         | B61B.00         | Lymphocyte-rich classical Hodgkin lymphoma                   | Any cancer         |
| 104484         | B61C.00         | Other classical Hodgkin lymphoma                             | Any cancer         |
| 53397          | B61z.00         | Hodgkin's disease NOS                                        | Any cancer         |
| 106349         | B61z.11         | Hodgkin lymphoma NOS                                         | Any cancer         |
| 61662          | B61z000         | Hodgkin's disease NOS, unspecified site                      | Any cancer         |
| 59778          | B61z100         | Hodgkin's disease NOS of lymph nodes of head, face and neck  | Any cancer         |
| 59755          | B61z200         | Hodgkin's disease NOS of intrathoracic lymph nodes           | Any cancer         |
| 107804         | B61z300         | Hodgkin's disease NOS of intra-abdominal lymph nodes         | Any cancer         |
| 91900          | B61z400         | Hodgkin's disease NOS of lymph nodes of axilla and arm       | Any cancer         |
| 99012          | B61z500         | Hodgkin's disease NOS of lymph nodes inguinal region and leg | Any cancer         |
| 94279          | B61z700         | Hodgkin's disease NOS of spleen                              | Any cancer         |
| 97746          | B61z800         | Hodgkin's disease NOS of lymph nodes of multiple sites       | Any cancer         |
| 42461          | B61zz00         | Hodgkin's disease NOS                                        | Any cancer         |
| 43415          | ByuD000         | [X]Other Hodgkin's disease                                   | Any cancer         |
| 41369          | B60..00         | Lymphosarcoma and reticulosarcoma                            | Any cancer         |
| 1481           | B600.00         | Reticulosarcoma                                              | Any cancer         |
| 60242          | B600000         | Reticulosarcoma of unspecified site                          | Any cancer         |
| 71031          | B600100         | Reticulosarcoma of lymph nodes of head, face and neck        | Any cancer         |
| 70374          | B600300         | Reticulosarcoma of intra-abdominal lymph nodes               | Any cancer         |
| 95058          | B600700         | Reticulosarcoma of spleen                                    | Any cancer         |
| 99240          | B600z00         | Reticulosarcoma NOS                                          | Any cancer         |
| 27416          | B601.00         | Lymphosarcoma                                                | Any cancer         |
| 71625          | B601000         | Lymphosarcoma of unspecified site                            | Any cancer         |
| 71238          | B601100         | Lymphosarcoma of lymph nodes of head, face and neck          | Any cancer         |
| 62380          | B601200         | Lymphosarcoma of intrathoracic lymph nodes                   | Any cancer         |
| 64670          | B601300         | Lymphosarcoma of intra-abdominal lymph nodes                 | Any cancer         |
| 100352         | B601500         | Lymphosarcoma of lymph nodes of inguinal region and leg      | Any cancer         |
| 103245         | B601700         | Lymphosarcoma of spleen                                      | Any cancer         |
| 104790         | B601800         | Lymphosarcoma of lymph nodes of multiple sites               | Any cancer         |
| 63723          | B601z00         | Lymphosarcoma NOS                                            | Any cancer         |
| 21402          | B602.00         | Burkitt's lymphoma                                           | Any cancer         |
| 59115          | B602100         | Burkitt's lymphoma of lymph nodes of head, face and neck     | Any cancer         |
| 100006         | B602200         | Burkitt's lymphoma of intrathoracic lymph nodes              | Any cancer         |
| 97577          | B602300         | Burkitt's lymphoma of intra-abdominal lymph nodes            | Any cancer         |
| 92380          | B602500         | Burkitt's lymphoma of lymph nodes of inguinal region and leg | Any cancer         |
| 71304          | B602z00         | Burkitt's lymphoma NOS                                       | Any cancer         |
| 99887          | B60y.00         | Other specified reticulosarcoma or lymphosarcoma             | Any cancer         |
| 99951          | B60z.00         | Reticulosarcoma or lymphosarcoma NOS                         | Any cancer         |
| 33333          | B62..00         | Other malignant neoplasm of lymphoid and histiocytic tissue  | Any cancer         |
| 5179           | B620.00         | Nodular lymphoma (Brill-Symmers disease)                     | Any cancer         |
| 66327          | B620000         | Nodular lymphoma of unspecified site                         | Any cancer         |

| <b>Medcode</b> | <b>Readcode</b> | <b>Description</b>                                          | <b>Cancer type</b> |
|----------------|-----------------|-------------------------------------------------------------|--------------------|
| 45264          | B620100         | Nodular lymphoma of lymph nodes of head, face and neck      | Any cancer         |
| 105203         | B620200         | Nodular lymphoma of intrathoracic lymph nodes               | Any cancer         |
| 92068          | B620300         | Nodular lymphoma of intra-abdominal lymph nodes             | Any cancer         |
| 94995          | B620500         | Nodular lymphoma of lymph nodes of inguinal region and leg  | Any cancer         |
| 58082          | B620800         | Nodular lymphoma of lymph nodes of multiple sites           | Any cancer         |
| 65701          | B620z00         | Nodular lymphoma NOS                                        | Any cancer         |
| 12006          | B621.00         | Mycosis fungoides                                           | Any cancer         |
| 95949          | B621000         | Mycosis fungoides of unspecified site                       | Any cancer         |
| 91674          | B621300         | Mycosis fungoides of intra-abdominal lymph nodes            | Any cancer         |
| 96379          | B621400         | Mycosis fungoides of lymph nodes of axilla and upper limb   | Any cancer         |
| 72714          | B621500         | Mycosis fungoides of lymph nodes of inguinal region and leg | Any cancer         |
| 95012          | B621800         | Mycosis fungoides of lymph nodes of multiple sites          | Any cancer         |
| 38005          | B621z00         | Mycosis fungoides NOS                                       | Any cancer         |
| 35014          | B622.00         | Sezary's disease                                            | Any cancer         |
| 100532         | B622z00         | Sezary's disease NOS                                        | Any cancer         |
| 44267          | B623.00         | Malignant histiocytosis                                     | Any cancer         |
| 69497          | B623000         | Malignant histiocytosis of unspecified site                 | Any cancer         |
| 94415          | B623100         | Malignant histiocytosis of lymph nodes head, face and neck  | Any cancer         |
| 65642          | B623300         | Malignant histiocytosis of intra-abdominal lymph nodes      | Any cancer         |
| 58871          | B623z00         | Malignant histiocytosis NOS                                 | Any cancer         |
| 27330          | B624.00         | Leukaemic reticuloendotheliosis                             | Any cancer         |
| 5137           | B624.11         | Leukaemic reticuloendotheliosis                             | Any cancer         |
| 65122          | B624000         | Leukaemic reticuloendotheliosis of unspecified sites        | Any cancer         |
| 65123          | B624300         | Leukaemic reticuloend of intra-abdominal lymph nodes        | Any cancer         |
| 73777          | B624z00         | Leukaemic reticuloendotheliosis NOS                         | Any cancer         |
| 34926          | B625.00         | Letterer-Siwe disease                                       | Any cancer         |
| 4870           | B625.11         | Histiocytosis X (acute, progressive)                        | Any cancer         |
| 102715         | B625000         | Letterer-Siwe disease of unspecified sites                  | Any cancer         |
| 102158         | B625200         | Letterer-Siwe disease of intrathoracic lymph nodes          | Any cancer         |
| 54083          | B625800         | Letterer-Siwe disease of lymph nodes of multiple sites      | Any cancer         |
| 47204          | B625z00         | Letterer-Siwe disease NOS                                   | Any cancer         |
| 15036          | B626.00         | Malignant mast cell tumours                                 | Any cancer         |
| 103900         | B626000         | Mast cell malignancy of unspecified site                    | Any cancer         |
| 100615         | B626500         | Mast cell malignancy of lymph nodes inguinal region and leg | Any cancer         |
| 31324          | B626800         | Mast cell malignancy of lymph nodes of multiple sites       | Any cancer         |
| 89657          | B626z00         | Malignant mast cell tumour NOS                              | Any cancer         |
| 3604           | B627.00         | Non-Hodgkin's lymphoma                                      | Any cancer         |
| 104391         | B627.11         | Non-Hodgkin lymphoma                                        | Any cancer         |
| 28639          | B627000         | Follicular non-Hodgkin's small cleaved cell lymphoma        | Any cancer         |
| 70842          | B627100         | Follicular non-Hodg mixed sml cleavd & lge cell lymphoma    | Any cancer         |
| 49262          | B627200         | Follicular non-Hodgkin's large cell lymphoma                | Any cancer         |
| 50668          | B627300         | Diffuse non-Hodgkin's small cell (diffuse) lymphoma         | Any cancer         |
| 108182         | B627400         | Diffuse non-Hodgkin's small cleaved cell (diffuse) lymphoma | Any cancer         |
| 50695          | B627500         | Diffuse non-Hodgkin mixed sml & lge cell (diffuse) lymphoma | Any cancer         |
| 53551          | B627600         | Diffuse non-Hodgkin's immunoblastic (diffuse) lymphoma      | Any cancer         |
| 17460          | B627700         | Diffuse non-Hodgkin's lymphoblastic (diffuse) lymphoma      | Any cancer         |

| <b>Medcode</b> | <b>Readcode</b> | <b>Description</b>                                           | <b>Cancer type</b> |
|----------------|-----------------|--------------------------------------------------------------|--------------------|
| 65180          | B627800         | Diffuse non-Hodgkin's lymphoma undifferentiated (diffuse)    | Any cancer         |
| 95715          | B627900         | Mucosa-associated lymphoma                                   | Any cancer         |
| 95545          | B627911         | Maltoma                                                      | Any cancer         |
| 101114         | B627A00         | Diffuse non-Hodgkin's large cell lymphoma                    | Any cancer         |
| 31576          | B627B00         | Other types of follicular non-Hodgkin's lymphoma             | Any cancer         |
| 21549          | B627C00         | Follicular non-Hodgkin's lymphoma                            | Any cancer         |
| 17182          | B627C11         | Follicular lymphoma NOS                                      | Any cancer         |
| 70509          | B627D00         | Diffuse non-Hodgkin's centroblastic lymphoma                 | Any cancer         |
| 102594         | B627E00         | Diffuse large B-cell lymphoma                                | Any cancer         |
| 105966         | B627F00         | Extranod marg zone B-cell lymphom mucosa-assoc lymphoid tiss | Any cancer         |
| 105038         | B627G00         | Mediastinal (thymic) large B-cell lymphoma                   | Any cancer         |
| 31794          | B627W00         | Unspecified B-cell non-Hodgkin's lymphoma                    | Any cancer         |
| 39798          | B627X00         | Diffuse non-Hodgkin's lymphoma, unspecified                  | Any cancer         |
| 104152         | B628.00         | Follicular lymphoma                                          | Any cancer         |
| 105889         | B628000         | Follicular lymphoma grade 1                                  | Any cancer         |
| 105095         | B628100         | Follicular lymphoma grade 2                                  | Any cancer         |
| 107166         | B628200         | Follicular lymphoma grade 3                                  | Any cancer         |
| 105020         | B628300         | Follicular lymphoma grade 3a                                 | Any cancer         |
| 107973         | B628400         | Follicular lymphoma grade 3b                                 | Any cancer         |
| 106969         | B628500         | Diffuse follicle centre lymphoma                             | Any cancer         |
| 108719         | B628600         | Cutaneous follicle centre lymphoma                           | Any cancer         |
| 106063         | B628700         | Other types of follicular lymphoma                           | Any cancer         |
| 105792         | B629.00         | Multifocal multisystemic dissem Langerhans-cell histiocytosi | Any cancer         |
| 105335         | B62A.00         | Sarcoma of dendritic cells                                   | Any cancer         |
| 110191         | B62B.00         | Multifocal and unisystemic Langerhans-cell histiocytosis     | Any cancer         |
| 105762         | B62C.00         | Unifocal Langerhans-cell histiocytosis                       | Any cancer         |
| 105083         | B62D.00         | Histiocytic sarcoma                                          | Any cancer         |
| 105085         | B62E.00         | T/NK-cell lymphoma                                           | Any cancer         |
| 105559         | B62E100         | Anaplastic large cell lymphoma, ALK-positive                 | Any cancer         |
| 105955         | B62E200         | Anaplastic large cell lymphoma, ALK-negative                 | Any cancer         |
| 104862         | B62E300         | Cutaneous T-cell lymphoma                                    | Any cancer         |
| 109780         | B62E400         | Extranodal NK/T-cell lymphoma, nasal type                    | Any cancer         |
| 107949         | B62E500         | Hepatosplenic T-cell lymphoma                                | Any cancer         |
| 105709         | B62E600         | Enteropathy-associated T-cell lymphoma                       | Any cancer         |
| 105925         | B62E700         | Subcutaneous panniculitic T-cell lymphoma                    | Any cancer         |
| 105375         | B62E800         | Blastic NK-cell lymphoma                                     | Any cancer         |
| 105636         | B62E900         | Angioimmunoblastic T-cell lymphoma                           | Any cancer         |
| 105286         | B62EA00         | Primary cutaneous CD30-positive T-cell proliferations        | Any cancer         |
| 104934         | B62Ew00         | Other mature T/NK-cell lymphoma                              | Any cancer         |
| 106884         | B62F.00         | Nonfollicular lymphoma                                       | Any cancer         |
| 106867         | B62F.11         | Non-follicular lymphoma                                      | Any cancer         |
| 104386         | B62F000         | Small cell B-cell lymphoma                                   | Any cancer         |
| 104620         | B62F100         | Mantle cell lymphoma                                         | Any cancer         |
| 104412         | B62F200         | Lymphoblastic (diffuse) lymphoma                             | Any cancer         |
| 17887          | B62x.00         | Malignant lymphoma otherwise specified                       | Any cancer         |
| 90201          | B62x000         | T-zone lymphoma                                              | Any cancer         |

| <b>Medcode</b> | <b>Readcode</b> | <b>Description</b>                                           | <b>Cancer type</b> |
|----------------|-----------------|--------------------------------------------------------------|--------------------|
| 57737          | B62x100         | Lymphoepithelioid lymphoma                                   | Any cancer         |
| 12464          | B62x200         | Peripheral T-cell lymphoma                                   | Any cancer         |
| 62437          | B62x400         | Malignant reticulosis                                        | Any cancer         |
| 58962          | B62x500         | Malignant immunoproliferative small intestinal disease       | Any cancer         |
| 95630          | B62x600         | True histiocytic lymphoma                                    | Any cancer         |
| 44318          | B62xX00         | Oth and unspecif peripheral & cutaneous T-cell lymphomas     | Any cancer         |
| 12335          | B62y.00         | Malignant lymphoma NOS                                       | Any cancer         |
| 57427          | B62y000         | Malignant lymphoma NOS of unspecified site                   | Any cancer         |
| 50696          | B62y100         | Malignant lymphoma NOS of lymph nodes of head, face and neck | Any cancer         |
| 72725          | B62y200         | Malignant lymphoma NOS of intrathoracic lymph nodes          | Any cancer         |
| 42579          | B62y300         | Malignant lymphoma NOS of intra-abdominal lymph nodes        | Any cancer         |
| 34089          | B62y400         | Malignant lymphoma NOS of lymph nodes of axilla and arm      | Any cancer         |
| 63105          | B62y500         | Malignant lymphoma NOS of lymph node inguinal region and leg | Any cancer         |
| 71262          | B62y600         | Malignant lymphoma NOS of intrapelvic lymph nodes            | Any cancer         |
| 60092          | B62y700         | Malignant lymphoma NOS of spleen                             | Any cancer         |
| 15504          | B62y800         | Malignant lymphoma NOS of lymph nodes of multiple sites      | Any cancer         |
| 15027          | B62yz00         | Malignant lymphoma NOS                                       | Any cancer         |
| 65434          | B62z.00         | Malignant neoplasms of lymphoid and histiocytic tissue NOS   | Any cancer         |
| 108037         | B62z000         | Unspec malig neop lymphoid/histiocytic of unspecified site   | Any cancer         |
| 64427          | B62z100         | Unspec malig neop lymphoid/histiocytic lymph node head/neck  | Any cancer         |
| 93384          | B62z200         | Unspec malig neop lymphoid/histiocytic of intrathoracic node | Any cancer         |
| 103353         | B62z300         | Unspec malig neop lymphoid/histiocytic intra-abdominal nodes | Any cancer         |
| 107638         | B62z400         | Unspec malig neop lymphoid/histiocytic lymph node axilla/arm | Any cancer         |
| 71609          | B62z500         | Unspec malig neop lymphoid/histiocytic nodes inguinal/leg    | Any cancer         |
| 109342         | B62z600         | Unspec malig neop lymphoid/histiocytic of intrapelvic nodes  | Any cancer         |
| 101465         | B62z800         | Unspec malig neop lymphoid/histiocytic of multiple sites     | Any cancer         |
| 95792          | B62zz00         | Lymphoid and histiocytic malignancy NOS                      | Any cancer         |
| 70716          | B62zz11         | Immunoproliferative neoplasm                                 | Any cancer         |
| 67518          | ByuD100         | [X]Other types of follicular non-Hodgkin's lymphoma          | Any cancer         |
| 98596          | ByuD200         | [X]Other types of diffuse non-Hodgkin's lymphoma             | Any cancer         |
| 64336          | ByuD300         | [X]Other specified types of non-Hodgkin's lymphoma           | Any cancer         |
| 64515          | ByuDC00         | [X]Diffuse non-Hodgkin's lymphoma, unspecified               | Any cancer         |
| 109714         | ByuDD00         | [X]Oth and unspecif peripheral & cutaneous T-cell lymphomas  | Any cancer         |
| 63375          | ByuDE00         | [X]Unspecified B-cell non-Hodgkin's lymphoma                 | Any cancer         |
| 8649           | ByuDF00         | [X]Non-Hodgkin's lymphoma, unspecified type                  | Any cancer         |
| 7940           | ByuDF11         | [X]Non-Hodgkin's lymphoma NOS                                | Any cancer         |
| 18617          | B51..00         | Malignant neoplasm of brain                                  | Any cancer         |
| 10851          | B51..11         | Cerebral tumour-malignant                                    | Any cancer         |
| 15711          | B510.00         | Malignant neoplasm cerebrum (excluding lobes and ventricles) | Any cancer         |
| 48073          | B510000         | Malignant neoplasm of basal ganglia                          | Any cancer         |
| 61399          | B510100         | Malignant neoplasm of cerebral cortex                        | Any cancer         |
| 99913          | B510300         | Malignant neoplasm of globus pallidus                        | Any cancer         |
| 70942          | B510400         | Malignant neoplasm of hypothalamus                           | Any cancer         |
| 62126          | B510500         | Malignant neoplasm of thalamus                               | Any cancer         |
| 54133          | B510z00         | Malignant neoplasm of cerebrum NOS                           | Any cancer         |
| 42426          | B511.00         | Malignant neoplasm of frontal lobe                           | Any cancer         |



| <b>Medcode</b> | <b>Readcode</b> | <b>Description</b>                                          | <b>Cancer type</b> |
|----------------|-----------------|-------------------------------------------------------------|--------------------|
| 46792          | B512.00         | Malignant neoplasm of temporal lobe                         | Any cancer         |
| 67236          | B512000         | Malignant neoplasm of hippocampus                           | Any cancer         |
| 47556          | B512z00         | Malignant neoplasm of temporal lobe NOS                     | Any cancer         |
| 19226          | B513.00         | Malignant neoplasm of parietal lobe                         | Any cancer         |
| 39088          | B514.00         | Malignant neoplasm of occipital lobe                        | Any cancer         |
| 52511          | B515.00         | Malignant neoplasm of cerebral ventricles                   | Any cancer         |
| 46789          | B515000         | Malignant neoplasm of choroid plexus                        | Any cancer         |
| 45154          | B516.00         | Malignant neoplasm of cerebellum                            | Any cancer         |
| 44089          | B517.00         | Malignant neoplasm of brain stem                            | Any cancer         |
| 64557          | B517000         | Malignant neoplasm of cerebral peduncle                     | Any cancer         |
| 49132          | B517100         | Malignant neoplasm of medulla oblongata                     | Any cancer         |
| 93537          | B517200         | Malignant neoplasm of midbrain                              | Any cancer         |
| 91240          | B517300         | Malignant neoplasm of pons                                  | Any cancer         |
| 68641          | B517z00         | Malignant neoplasm of brain stem NOS                        | Any cancer         |
| 71139          | B51y.00         | Malignant neoplasm of other parts of brain                  | Any cancer         |
| 59170          | B51y000         | Malignant neoplasm of corpus callosum                       | Any cancer         |
| 65241          | B51y200         | Malignant neoplasm, overlapping lesion of brain             | Any cancer         |
| 100733         | B51yz00         | Malignant neoplasm of other part of brain NOS               | Any cancer         |
| 41520          | B51z.00         | Malignant neoplasm of brain NOS                             | Any cancer         |
| 65458          | B52..00         | Malig neop of other and unspecified parts of nervous system | Any cancer         |
| 99621          | B520.00         | Malignant neoplasm of cranial nerves                        | Any cancer         |
| 64971          | B520000         | Malignant neoplasm of olfactory bulb                        | Any cancer         |
| 70126          | B520100         | Malignant neoplasm of optic nerve                           | Any cancer         |
| 65599          | B520200         | Malignant neoplasm of acoustic nerve                        | Any cancer         |
| 101086         | B520z00         | Malignant neoplasm of cranial nerves NOS                    | Any cancer         |
| 28919          | B521.00         | Malignant neoplasm of cerebral meninges                     | Any cancer         |
| 109473         | B521200         | Malignant neoplasm of cerebral pia mater                    | Any cancer         |
| 70104          | B521z00         | Malignant neoplasm of cerebral meninges NOS                 | Any cancer         |
| 41515          | ByuA100         | [X]Malignant neoplasm/central nervous system, unspecified   | Any cancer         |
| 63925          | ByuA200         | [X]Malignant neoplasm of meninges, unspecified              | Any cancer         |
| 47633          | ByuA300         | [X]Malig neopl, overlap lesion brain & other part of CNS    | Any cancer         |
| 3968           | B34..00         | Malignant neoplasm of female breast                         | Any cancer         |
| 348            | B34..11         | Ca female breast                                            | Any cancer         |
| 26853          | B340.00         | Malignant neoplasm of nipple and areola of female breast    | Any cancer         |
| 23380          | B340000         | Malignant neoplasm of nipple of female breast               | Any cancer         |
| 64686          | B340100         | Malignant neoplasm of areola of female breast               | Any cancer         |
| 59831          | B340z00         | Malignant neoplasm of nipple or areola of female breast NOS | Any cancer         |
| 31546          | B341.00         | Malignant neoplasm of central part of female breast         | Any cancer         |
| 29826          | B342.00         | Malignant neoplasm of upper-inner quadrant of female breast | Any cancer         |
| 45222          | B343.00         | Malignant neoplasm of lower-inner quadrant of female breast | Any cancer         |
| 23399          | B344.00         | Malignant neoplasm of upper-outer quadrant of female breast | Any cancer         |
| 42070          | B345.00         | Malignant neoplasm of lower-outer quadrant of female breast | Any cancer         |
| 20685          | B346.00         | Malignant neoplasm of axillary tail of female breast        | Any cancer         |
| 49148          | B347.00         | Malignant neoplasm, overlapping lesion of breast            | Any cancer         |
| 56715          | B34y.00         | Malignant neoplasm of other site of female breast           | Any cancer         |
| 95057          | B34y000         | Malignant neoplasm of ectopic site of female breast         | Any cancer         |

| <b>Medcode</b> | <b>Readcode</b> | <b>Description</b>                                     | <b>Cancer type</b> |
|----------------|-----------------|--------------------------------------------------------|--------------------|
| 38475          | B34yz00         | Malignant neoplasm of other site of female breast NOS  | Any cancer         |
| 9470           | B34z.00         | Malignant neoplasm of female breast NOS                | Any cancer         |
| 19423          | B35..00         | Malignant neoplasm of male breast                      | Any cancer         |
| 54494          | B350.00         | Malignant neoplasm of nipple and areola of male breast | Any cancer         |
| 68480          | B350000         | Malignant neoplasm of nipple of male breast            | Any cancer         |
| 67884          | B350100         | Malignant neoplasm of areola of male breast            | Any cancer         |
| 54202          | B35z.00         | Malignant neoplasm of other site of male breast        | Any cancer         |
| 95323          | B35z000         | Malignant neoplasm of ectopic site of male breast      | Any cancer         |
| 48809          | B35zz00         | Malignant neoplasm of male breast NOS                  | Any cancer         |
| 105488         | B36..00         | Local recurrence of malignant tumour of breast         | Any cancer         |
| 7833           | B830.00         | Carcinoma in situ of breast                            | Any cancer         |
| 10387          | B830000         | Lobular carcinoma in situ of breast                    | Any cancer         |
| 18694          | B830100         | Intraductal carcinoma in situ of breast                | Any cancer         |
| 12499          | Byu6.00         | [X]Malignant neoplasm of breast                        | Any cancer         |
| 53803          | ByuFG00         | [X]Other carcinoma in situ of breast                   | Any cancer         |
| 108667         | B1z1000         | Angiosarcoma of spleen                                 | Any cancer         |
| 72224          | B1z1100         | Fibrosarcoma of spleen                                 | Any cancer         |
| 12539          | B3...12         | Sarcoma of bone and connective tissue                  | Any cancer         |
| 18314          | B30..00         | Malignant neoplasm of bone and articular cartilage     | Any cancer         |
| 5062           | B30..11         | Chondroma                                              | Any cancer         |
| 29735          | B30..12         | Osteoma                                                | Any cancer         |
| 59036          | B300.00         | Malignant neoplasm of bones of skull and face          | Any cancer         |
| 53594          | B300000         | Malignant neoplasm of ethmoid bone                     | Any cancer         |
| 53599          | B300100         | Malignant neoplasm of frontal bone                     | Any cancer         |
| 59520          | B300200         | Malignant neoplasm of malar bone                       | Any cancer         |
| 95458          | B300300         | Malignant neoplasm of nasal bone                       | Any cancer         |
| 55953          | B300400         | Malignant neoplasm of occipital bone                   | Any cancer         |
| 50298          | B300500         | Malignant neoplasm of orbital bone                     | Any cancer         |
| 54747          | B300600         | Malignant neoplasm of parietal bone                    | Any cancer         |
| 55595          | B300700         | Malignant neoplasm of sphenoid bone                    | Any cancer         |
| 62104          | B300800         | Malignant neoplasm of temporal bone                    | Any cancer         |
| 50299          | B300900         | Malignant neoplasm of zygomatic bone                   | Any cancer         |
| 17475          | B300A00         | Malignant neoplasm of maxilla                          | Any cancer         |
| 96445          | B300B00         | Malignant neoplasm of turbinate                        | Any cancer         |
| 44452          | B300C00         | Malignant neoplasm of vomer                            | Any cancer         |
| 69146          | B300z00         | Malignant neoplasm of bones of skull and face NOS      | Any cancer         |
| 33833          | B301.00         | Malignant neoplasm of mandible                         | Any cancer         |
| 16704          | B302.00         | Malignant neoplasm of vertebral column                 | Any cancer         |
| 46939          | B302000         | Malignant neoplasm of cervical vertebra                | Any cancer         |
| 32372          | B302100         | Malignant neoplasm of thoracic vertebra                | Any cancer         |
| 54691          | B302200         | Malignant neoplasm of lumbar vertebra                  | Any cancer         |
| 49701          | B302z00         | Malignant neoplasm of vertebral column NOS             | Any cancer         |
| 27528          | B303.00         | Malignant neoplasm of ribs, sternum and clavicle       | Any cancer         |
| 37842          | B303000         | Malignant neoplasm of rib                              | Any cancer         |
| 49491          | B303100         | Malignant neoplasm of sternum                          | Any cancer         |
| 66639          | B303200         | Malignant neoplasm of clavicle                         | Any cancer         |

| <b>Medcode</b> | <b>Readcode</b> | <b>Description</b>                                        | <b>Cancer type</b> |
|----------------|-----------------|-----------------------------------------------------------|--------------------|
| 60403          | B303300         | Malignant neoplasm of costal cartilage                    | Any cancer         |
| 67763          | B303400         | Malignant neoplasm of costo-vertebral joint               | Any cancer         |
| 54493          | B303500         | Malignant neoplasm of xiphoid process                     | Any cancer         |
| 51237          | B303z00         | Malignant neoplasm of rib, sternum and clavicle NOS       | Any cancer         |
| 71810          | B304.00         | Malignant neoplasm of scapula and long bones of upper arm | Any cancer         |
| 49054          | B304000         | Malignant neoplasm of scapula                             | Any cancer         |
| 105797         | B304100         | Malignant neoplasm of acromion                            | Any cancer         |
| 61741          | B304200         | Malignant neoplasm of humerus                             | Any cancer         |
| 92371          | B304300         | Malignant neoplasm of radius                              | Any cancer         |
| 64848          | B304400         | Malignant neoplasm of ulna                                | Any cancer         |
| 65880          | B304z00         | Malig neop of scapula and long bones of upper arm NOS     | Any cancer         |
| 73530          | B305.00         | Malignant neoplasm of hand bones                          | Any cancer         |
| 106069         | B305.11         | Malignant neoplasm of carpal bones                        | Any cancer         |
| 72464          | B305.12         | Malignant neoplasm of metacarpal bones                    | Any cancer         |
| 57988          | B305000         | Malignant neoplasm of carpal bone-scaphoid                | Any cancer         |
| 69104          | B305100         | Malignant neoplasm of carpal bone-lunate                  | Any cancer         |
| 108638         | B305A00         | Malignant neoplasm of third metacarpal bone               | Any cancer         |
| 94427          | B305C00         | Malignant neoplasm of fifth metacarpal bone               | Any cancer         |
| 86812          | B305D00         | Malignant neoplasm of phalanges of hand                   | Any cancer         |
| 73556          | B305z00         | Malignant neoplasm of hand bones NOS                      | Any cancer         |
| 54631          | B306.00         | Malignant neoplasm of pelvic bones, sacrum and coccyx     | Any cancer         |
| 44609          | B306000         | Malignant neoplasm of ilium                               | Any cancer         |
| 59223          | B306100         | Malignant neoplasm of ischium                             | Any cancer         |
| 51921          | B306200         | Malignant neoplasm of pubis                               | Any cancer         |
| 40966          | B306300         | Malignant neoplasm of sacral vertebra                     | Any cancer         |
| 66908          | B306400         | Malignant neoplasm of coccygeal vertebra                  | Any cancer         |
| 50152          | B306500         | Malignant sacral teratoma                                 | Any cancer         |
| 38938          | B306z00         | Malignant neoplasm of pelvis, sacrum or coccyx NOS        | Any cancer         |
| 68055          | B307.00         | Malignant neoplasm of long bones of leg                   | Any cancer         |
| 56513          | B307000         | Malignant neoplasm of femur                               | Any cancer         |
| 50402          | B307100         | Malignant neoplasm of fibula                              | Any cancer         |
| 40814          | B307200         | Malignant neoplasm of tibia                               | Any cancer         |
| 62630          | B307z00         | Malignant neoplasm of long bones of leg NOS               | Any cancer         |
| 105475         | B308.00         | Malignant neoplasm of short bones of leg                  | Any cancer         |
| 95182          | B308100         | Malignant neoplasm of talus                               | Any cancer         |
| 72212          | B308200         | Malignant neoplasm of calcaneum                           | Any cancer         |
| 34878          | B308300         | Malignant neoplasm of medial cuneiform                    | Any cancer         |
| 69927          | B308800         | Malignant neoplasm of first metatarsal bone               | Any cancer         |
| 92382          | B308B00         | Malignant neoplasm of fourth metatarsal bone              | Any cancer         |
| 58949          | B308D00         | Malignant neoplasm of phalanges of foot                   | Any cancer         |
| 103354         | B308z00         | Malignant neoplasm of short bones of leg NOS              | Any cancer         |
| 67451          | B30W.00         | Malignant neoplasm/overlap lesion/bone+articulr cartilage | Any cancer         |
| 43614          | B30X.00         | Malignant neoplasm/bones+articular cartilage/limb,unspfd  | Any cancer         |
| 16075          | B30z.00         | Malignant neoplasm of bone and articular cartilage NOS    | Any cancer         |
| 19437          | B30z000         | Osteosarcoma                                              | Any cancer         |
| 34451          | B31..00         | Malignant neoplasm of connective and other soft tissue    | Any cancer         |

| <b>Medcode</b> | <b>Readcode</b> | <b>Description</b>                                           | <b>Cancer type</b> |
|----------------|-----------------|--------------------------------------------------------------|--------------------|
| 43475          | B310.00         | Malig neop of connective and soft tissue head, face and neck | Any cancer         |
| 59382          | B310000         | Malignant neoplasm of soft tissue of head                    | Any cancer         |
| 40014          | B310100         | Malignant neoplasm of soft tissue of face                    | Any cancer         |
| 48517          | B310200         | Malignant neoplasm of soft tissue of neck                    | Any cancer         |
| 60035          | B310300         | Malignant neoplasm of cartilage of ear                       | Any cancer         |
| 49463          | B310400         | Malignant neoplasm of tarsus of eyelid                       | Any cancer         |
| 108389         | B310500         | Malignant neoplasm soft tissues of cervical spine            | Any cancer         |
| 73718          | B310z00         | Malig neop connective and soft tissue head, face, neck NOS   | Any cancer         |
| 53989          | B311.00         | Malig neop connective and soft tissue upper limb/shoulder    | Any cancer         |
| 50222          | B311000         | Malignant neoplasm of connective and soft tissue of shoulder | Any cancer         |
| 64345          | B311100         | Malignant neoplasm of connective and soft tissue, upper arm  | Any cancer         |
| 57482          | B311200         | Malignant neoplasm of connective and soft tissue of fore-arm | Any cancer         |
| 19321          | B311300         | Malignant neoplasm of connective and soft tissue of hand     | Any cancer         |
| 91586          | B311400         | Malignant neoplasm of connective and soft tissue of finger   | Any cancer         |
| 63988          | B311500         | Malignant neoplasm of connective and soft tissue of thumb    | Any cancer         |
| 104913         | B311z00         | Malig neop connective soft tissue upper limb/shoulder NOS    | Any cancer         |
| 66088          | B312.00         | Malig neop of connective and soft tissue of hip and leg      | Any cancer         |
| 102949         | B312000         | Malignant neoplasm of connective and soft tissue of hip      | Any cancer         |
| 44805          | B312100         | Malig neop of connective and soft tissue thigh and upper leg | Any cancer         |
| 54965          | B312200         | Malig neop connective and soft tissue of popliteal space     | Any cancer         |
| 30542          | B312300         | Malig neop of connective and soft tissue of lower leg        | Any cancer         |
| 54222          | B312400         | Malignant neoplasm of connective and soft tissue of foot     | Any cancer         |
| 99572          | B312500         | Malignant neoplasm of connective and soft tissue of toe      | Any cancer         |
| 90546          | B312z00         | Malig neop connective and soft tissue hip and leg NOS        | Any cancer         |
| 22290          | B313.00         | Malignant neoplasm of connective and soft tissue of thorax   | Any cancer         |
| 29160          | B313000         | Malignant neoplasm of connective and soft tissue of axilla   | Any cancer         |
| 54186          | B313100         | Malignant neoplasm of diaphragm                              | Any cancer         |
| 72522          | B313200         | Malignant neoplasm of great vessels                          | Any cancer         |
| 104139         | B313300         | Malig neoplasm of connective and soft tissues of thor spine  | Any cancer         |
| 98408          | B313z00         | Malig neop of connective and soft tissue of thorax NOS       | Any cancer         |
| 45071          | B314.00         | Malignant neoplasm of connective and soft tissue of abdomen  | Any cancer         |
| 66488          | B314000         | Malig neop of connective and soft tissue of abdominal wall   | Any cancer         |
| 94272          | B314100         | Malig neoplasm of connective and soft tissues of lumb spine  | Any cancer         |
| 60247          | B314z00         | Malig neop of connective and soft tissue of abdomen NOS      | Any cancer         |
| 51965          | B315.00         | Malignant neoplasm of connective and soft tissue of pelvis   | Any cancer         |
| 70463          | B315000         | Malignant neoplasm of connective and soft tissue of buttock  | Any cancer         |
| 67324          | B315100         | Malig neop of connective and soft tissue of inguinal region  | Any cancer         |
| 59152          | B315200         | Malignant neoplasm of connective and soft tissue of perineum | Any cancer         |
| 110192         | B315300         | Malig neopl of connective and soft tissue-sacrum or coccyx   | Any cancer         |
| 58836          | B315z00         | Malig neop of connective and soft tissue of pelvis NOS       | Any cancer         |
| 57471          | B316.00         | Malig neop of connective and soft tissue trunk unspecified   | Any cancer         |
| 65233          | B31y.00         | Malig neop connective and soft tissue other specified site   | Any cancer         |
| 15182          | B31z.00         | Malignant neoplasm of connective and soft tissue, site NOS   | Any cancer         |
| 104128         | B31z000         | Kaposi's sarcoma of soft tissue                              | Any cancer         |
| 27931          | B33z000         | Kaposi's sarcoma of skin                                     | Any cancer         |
| 40749          | Byu3.00         | [X]Malignant neoplasm of bone and articular cartilage        | Any cancer         |

| <b>Medcode</b> | <b>Readcode</b> | <b>Description</b>                                           | <b>Cancer type</b> |
|----------------|-----------------|--------------------------------------------------------------|--------------------|
| 73296          | Byu3100         | [X]Malignant neoplasm/bones+articular cartilage/limb,unspfd  | Any cancer         |
| 63300          | Byu3200         | [X]Malignant neoplasm/overlap lesion/bone+articulr cartilage | Any cancer         |
| 43151          | Byu3300         | [X]Malignant neoplasm/bone+articular cartilage, unspecified  | Any cancer         |
| 20160          | B50..00         | Malignant neoplasm of eye                                    | Any cancer         |
| 98813          | B500.00         | Malig neop eyeball excl conjunctiva, cornea, retina, choroid | Any cancer         |
| 59041          | B500000         | Malignant neoplasm of ciliary body                           | Any cancer         |
| 59381          | B500100         | Malignant neoplasm of iris                                   | Any cancer         |
| 106569         | B500200         | Malignant neoplasm of crystalline lens                       | Any cancer         |
| 56718          | B500z00         | Malignant neoplasm of eyeball NOS                            | Any cancer         |
| 45667          | B501.00         | Malignant neoplasm of orbit                                  | Any cancer         |
| 86996          | B501000         | Malignant neoplasm of connective tissue of orbit             | Any cancer         |
| 63104          | B501z00         | Malignant neoplasm of orbit NOS                              | Any cancer         |
| 64817          | B502.00         | Malignant neoplasm of lacrimal gland                         | Any cancer         |
| 63657          | B503.00         | Malignant neoplasm of conjunctiva                            | Any cancer         |
| 73992          | B504.00         | Malignant neoplasm of cornea                                 | Any cancer         |
| 28069          | B505.00         | Malignant neoplasm of retina                                 | Any cancer         |
| 15991          | B506.00         | Malignant neoplasm of choroid                                | Any cancer         |
| 71584          | B507.00         | Malignant neoplasm of lacrimal duct                          | Any cancer         |
| 101805         | B507000         | Malignant neoplasm of lacrimal sac                           | Any cancer         |
| 65357          | B507100         | Malignant neoplasm of nasolacrimal duct                      | Any cancer         |
| 45922          | B508.00         | Malignant neoplasm, overlapping lesion of eye and adnexa     | Any cancer         |
| 40437          | B50y.00         | Malignant neoplasm of other specified site of eye            | Any cancer         |
| 54956          | B50z.00         | Malignant neoplasm of eye NOS                                | Any cancer         |
| 15709          | B1...00         | Malignant neoplasm of digestive organs and peritoneum        | Any cancer         |
| 3357           | B1...11         | Carcinoma of digestive organs and peritoneum                 | Any cancer         |
| 1062           | B10..00         | Malignant neoplasm of oesophagus                             | Any cancer         |
| 61695          | B100.00         | Malignant neoplasm of cervical oesophagus                    | Any cancer         |
| 41362          | B101.00         | Malignant neoplasm of thoracic oesophagus                    | Any cancer         |
| 63470          | B102.00         | Malignant neoplasm of abdominal oesophagus                   | Any cancer         |
| 50789          | B103.00         | Malignant neoplasm of upper third of oesophagus              | Any cancer         |
| 54171          | B104.00         | Malignant neoplasm of middle third of oesophagus             | Any cancer         |
| 42416          | B105.00         | Malignant neoplasm of lower third of oesophagus              | Any cancer         |
| 67497          | B106.00         | Malignant neoplasm, overlapping lesion of oesophagus         | Any cancer         |
| 98142          | B107.00         | Siewert type I adenocarcinoma                                | Any cancer         |
| 53591          | B10y.00         | Malignant neoplasm of other specified part of oesophagus     | Any cancer         |
| 30700          | B10z.00         | Malignant neoplasm of oesophagus NOS                         | Any cancer         |
| 4865           | B10z.11         | Oesophageal cancer                                           | Any cancer         |
| 8386           | B11..00         | Malignant neoplasm of stomach                                | Any cancer         |
| 10368          | B11..11         | Gastric neoplasm                                             | Any cancer         |
| 32022          | B110.00         | Malignant neoplasm of cardia of stomach                      | Any cancer         |
| 100584         | B110000         | Malignant neoplasm of cardiac orifice of stomach             | Any cancer         |
| 22894          | B110100         | Malignant neoplasm of cardio-oesophageal junction of stomach | Any cancer         |
| 94278          | B110111         | Malignant neoplasm of gastro-oesophageal junction            | Any cancer         |
| 37859          | B110z00         | Malignant neoplasm of cardia of stomach NOS                  | Any cancer         |
| 21620          | B111.00         | Malignant neoplasm of pylorus of stomach                     | Any cancer         |
| 48237          | B111000         | Malignant neoplasm of prepylorus of stomach                  | Any cancer         |

| <b>Medcode</b> | <b>Readcode</b> | <b>Description</b>                                           | <b>Cancer type</b> |
|----------------|-----------------|--------------------------------------------------------------|--------------------|
| 41215          | B111100         | Malignant neoplasm of pyloric canal of stomach               | Any cancer         |
| 59092          | B111z00         | Malignant neoplasm of pylorus of stomach NOS                 | Any cancer         |
| 19318          | B112.00         | Malignant neoplasm of pyloric antrum of stomach              | Any cancer         |
| 32362          | B113.00         | Malignant neoplasm of fundus of stomach                      | Any cancer         |
| 43572          | B114.00         | Malignant neoplasm of body of stomach                        | Any cancer         |
| 42193          | B115.00         | Malignant neoplasm of lesser curve of stomach unspecified    | Any cancer         |
| 55434          | B116.00         | Malignant neoplasm of greater curve of stomach unspecified   | Any cancer         |
| 51690          | B117.00         | Malignant neoplasm, overlapping lesion of stomach            | Any cancer         |
| 97499          | B118.00         | Siewert type II adenocarcinoma                               | Any cancer         |
| 96094          | B119.00         | Siewert type III adenocarcinoma                              | Any cancer         |
| 55019          | B11y.00         | Malignant neoplasm of other specified site of stomach        | Any cancer         |
| 65312          | B11y000         | Malignant neoplasm of anterior wall of stomach NEC           | Any cancer         |
| 96802          | B11y100         | Malignant neoplasm of posterior wall of stomach NEC          | Any cancer         |
| 65372          | B11yz00         | Malignant neoplasm of other specified site of stomach NOS    | Any cancer         |
| 14800          | B11z.00         | Malignant neoplasm of stomach NOS                            | Any cancer         |
| 6806           | B12..00         | Malignant neoplasm of small intestine and duodenum           | Any cancer         |
| 18613          | B120.00         | Malignant neoplasm of duodenum                               | Any cancer         |
| 43479          | B121.00         | Malignant neoplasm of jejunum                                | Any cancer         |
| 33871          | B122.00         | Malignant neoplasm of ileum                                  | Any cancer         |
| 63995          | B123.00         | Malignant neoplasm of Meckel's diverticulum                  | Any cancer         |
| 66166          | B124.00         | Malignant neoplasm, overlapping lesion of small intestine    | Any cancer         |
| 99896          | B12y.00         | Malignant neoplasm of other specified site small intestine   | Any cancer         |
| 43390          | B12z.00         | Malignant neoplasm of small intestine NOS                    | Any cancer         |
| 1220           | B13..00         | Malignant neoplasm of colon                                  | Any cancer         |
| 9088           | B130.00         | Malignant neoplasm of hepatic flexure of colon               | Any cancer         |
| 6935           | B131.00         | Malignant neoplasm of transverse colon                       | Any cancer         |
| 10864          | B132.00         | Malignant neoplasm of descending colon                       | Any cancer         |
| 2815           | B133.00         | Malignant neoplasm of sigmoid colon                          | Any cancer         |
| 3811           | B134.00         | Malignant neoplasm of caecum                                 | Any cancer         |
| 22163          | B134.11         | Carcinoma of caecum                                          | Any cancer         |
| 18632          | B135.00         | Malignant neoplasm of appendix                               | Any cancer         |
| 10946          | B136.00         | Malignant neoplasm of ascending colon                        | Any cancer         |
| 18619          | B137.00         | Malignant neoplasm of splenic flexure of colon               | Any cancer         |
| 93478          | B138.00         | Malignant neoplasm, overlapping lesion of colon              | Any cancer         |
| 101700         | B139.00         | Hereditary nonpolyposis colon cancer                         | Any cancer         |
| 48231          | B13y.00         | Malignant neoplasm of other specified sites of colon         | Any cancer         |
| 28163          | B13z.00         | Malignant neoplasm of colon NOS                              | Any cancer         |
| 9118           | B13z.11         | Colonic cancer                                               | Any cancer         |
| 35357          | B14..00         | Malignant neoplasm of rectum, rectosigmoid junction and anus | Any cancer         |
| 27855          | B140.00         | Malignant neoplasm of rectosigmoid junction                  | Any cancer         |
| 1800           | B141.00         | Malignant neoplasm of rectum                                 | Any cancer         |
| 7219           | B141.11         | Carcinoma of rectum                                          | Any cancer         |
| 5901           | B141.12         | Rectal carcinoma                                             | Any cancer         |
| 24370          | B142.00         | Malignant neoplasm of anal canal                             | Any cancer         |
| 9491           | B142.11         | Anal carcinoma                                               | Any cancer         |
| 46159          | B142000         | Malignant neoplasm of cloacogenic zone                       | Any cancer         |

| <b>Medcode</b> | <b>Readcode</b> | <b>Description</b>                                           | <b>Cancer type</b> |
|----------------|-----------------|--------------------------------------------------------------|--------------------|
| 27897          | B143.00         | Malignant neoplasm of anus unspecified                       | Any cancer         |
| 55659          | B14y.00         | Malig neop other site rectum, rectosigmoid junction and anus | Any cancer         |
| 50974          | B14z.00         | Malignant neoplasm rectum,rectosigmoid junction and anus NOS | Any cancer         |
| 17559          | B1z0.00         | Malignant neoplasm of intestinal tract, part unspecified     | Any cancer         |
| 11628          | B1z0.11         | Cancer of bowel                                              | Any cancer         |
| 94776          | B1z2.00         | Malignant neoplasm, overlapping lesion of digestive system   | Any cancer         |
| 56918          | B1zy.00         | Malignant neoplasm other spec digestive tract and peritoneum | Any cancer         |
| 51255          | B1zz.00         | Malignant neoplasm of digestive tract and peritoneum NOS     | Any cancer         |
| 8244           | B801.00         | Carcinoma in situ of oesophagus                              | Any cancer         |
| 99155          | B801000         | Carcinoma in situ of upper 1/3 oesophagus                    | Any cancer         |
| 64274          | B801100         | Carcinoma in situ of middle 1/3 oesophagus                   | Any cancer         |
| 56077          | B801200         | Carcinoma in situ of lower 1/3 oesophagus                    | Any cancer         |
| 44228          | B801z00         | Carcinoma in situ of oesophagus NOS                          | Any cancer         |
| 17093          | B802.00         | Carcinoma in situ of stomach                                 | Any cancer         |
| 17258          | B802000         | Carcinoma in situ of cardia of stomach                       | Any cancer         |
| 72947          | B802100         | Carcinoma in situ of fundus of stomach                       | Any cancer         |
| 63087          | B802200         | Carcinoma in situ of body of stomach                         | Any cancer         |
| 51748          | B802300         | Carcinoma in situ of pyloric antrum                          | Any cancer         |
| 58883          | B802400         | Carcinoma in situ of pyloric canal                           | Any cancer         |
| 37774          | B802z00         | Carcinoma in situ of stomach NOS                             | Any cancer         |
| 6903           | B803.00         | Carcinoma in situ of colon                                   | Any cancer         |
| 39080          | B803000         | Carcinoma in situ of hepatic flexure of colon                | Any cancer         |
| 37125          | B803100         | Carcinoma in situ of transverse colon                        | Any cancer         |
| 47667          | B803200         | Carcinoma in situ of descending colon                        | Any cancer         |
| 17144          | B803300         | Carcinoma in situ of sigmoid colon                           | Any cancer         |
| 16916          | B803400         | Carcinoma in situ of caecum                                  | Any cancer         |
| 47656          | B803500         | Carcinoma in situ of appendix                                | Any cancer         |
| 31893          | B803600         | Carcinoma in situ of ascending colon                         | Any cancer         |
| 22699          | B803700         | Carcinoma in situ of splenic flexure of colon                | Any cancer         |
| 105228         | B803800         | High grade dysplasia of colon                                | Any cancer         |
| 33561          | B803z00         | Carcinoma in situ of colon NOS                               | Any cancer         |
| 60477          | B804.00         | Carcinoma in situ of rectum and rectosigmoid junction        | Any cancer         |
| 27811          | B804000         | Carcinoma in situ of rectosigmoid junction                   | Any cancer         |
| 29975          | B804100         | Carcinoma in situ of rectum                                  | Any cancer         |
| 38883          | B804z00         | Carcinoma in situ of rectum or rectosigmoid junction NOS     | Any cancer         |
| 51054          | B805.00         | Carcinoma in situ of anal canal                              | Any cancer         |
| 34094          | B805000         | Anal intraepithelial neoplasia grade III                     | Any cancer         |
| 12273          | B806.00         | Carcinoma in situ of anus NOS                                | Any cancer         |
| 22392          | B807.00         | Carcinoma in situ of other and unspecified small intestine   | Any cancer         |
| 45070          | B807000         | Carcinoma in situ of duodenum                                | Any cancer         |
| 63804          | B807100         | Carcinoma in situ of jejunum                                 | Any cancer         |
| 45217          | B807200         | Carcinoma in situ of ileum                                   | Any cancer         |
| 100183         | B807300         | Carcinoma in situ of Meckel's diverticulum                   | Any cancer         |
| 70728          | B807z00         | Carcinoma in situ other and unspecified small intestine NOS  | Any cancer         |
| 35180          | Byu1.00         | [X]Malignant neoplasm of digestive organs                    | Any cancer         |
| 45766          | Byu1200         | [X]Malignant neoplasm of intestinal tract, part unspecified  | Any cancer         |

| <b>Medcode</b> | <b>Readcode</b> | <b>Description</b>                                            | <b>Cancer type</b> |
|----------------|-----------------|---------------------------------------------------------------|--------------------|
| 49292          | Byu1300         | [X]Malignant neoplasm/ill-defin sites within digestive system | Any cancer         |
| 102708         | ByuF100         | [X]Carcinoma in situ of other specified digestive organs      | Any cancer         |
| 2744           | B40..00         | Malignant neoplasm of uterus, part unspecified                | Any cancer         |
| 2747           | B41..00         | Malignant neoplasm of cervix uteri                            | Any cancer         |
| 3230           | B41..11         | Cervical carcinoma (uterus)                                   | Any cancer         |
| 48820          | B410.00         | Malignant neoplasm of endocervix                              | Any cancer         |
| 57235          | B410000         | Malignant neoplasm of endocervical canal                      | Any cancer         |
| 53103          | B410100         | Malignant neoplasm of endocervical gland                      | Any cancer         |
| 50285          | B410z00         | Malignant neoplasm of endocervix NOS                          | Any cancer         |
| 50297          | B411.00         | Malignant neoplasm of exocervix                               | Any cancer         |
| 58094          | B412.00         | Malignant neoplasm, overlapping lesion of cervix uteri        | Any cancer         |
| 32955          | B41y.00         | Malignant neoplasm of other site of cervix                    | Any cancer         |
| 95505          | B41y000         | Malignant neoplasm of cervical stump                          | Any cancer         |
| 57719          | B41y100         | Malignant neoplasm of squamocolumnar junction of cervix       | Any cancer         |
| 43435          | B41yz00         | Malignant neoplasm of other site of cervix NOS                | Any cancer         |
| 28311          | B41z.00         | Malignant neoplasm of cervix uteri NOS                        | Any cancer         |
| 93762          | B42..00         | Malignant neoplasm of placenta                                | Any cancer         |
| 28003          | B420.00         | Choriocarcinoma                                               | Any cancer         |
| 7046           | B43..00         | Malignant neoplasm of body of uterus                          | Any cancer         |
| 3213           | B430.00         | Malignant neoplasm of corpus uteri, excluding isthmus         | Any cancer         |
| 72723          | B430000         | Malignant neoplasm of cornu of corpus uteri                   | Any cancer         |
| 68155          | B430100         | Malignant neoplasm of fundus of corpus uteri                  | Any cancer         |
| 2890           | B430200         | Malignant neoplasm of endometrium of corpus uteri             | Any cancer         |
| 49400          | B430211         | Malignant neoplasm of endometrium                             | Any cancer         |
| 45793          | B430300         | Malignant neoplasm of myometrium of corpus uteri              | Any cancer         |
| 45490          | B430z00         | Malignant neoplasm of corpus uteri NOS                        | Any cancer         |
| 43940          | B431.00         | Malignant neoplasm of isthmus of uterine body                 | Any cancer         |
| 59097          | B431000         | Malignant neoplasm of lower uterine segment                   | Any cancer         |
| 70729          | B431z00         | Malignant neoplasm of isthmus of uterine body NOS             | Any cancer         |
| 16967          | B432.00         | Malignant neoplasm of overlapping lesion of corpus uteri      | Any cancer         |
| 31608          | B43y.00         | Malignant neoplasm of other site of uterine body              | Any cancer         |
| 33617          | B43z.00         | Malignant neoplasm of body of uterus NOS                      | Any cancer         |
| 19141          | B44..00         | Malignant neoplasm of ovary and other uterine adnexa          | Any cancer         |
| 7805           | B440.00         | Malignant neoplasm of ovary                                   | Any cancer         |
| 1986           | B440.11         | Cancer of ovary                                               | Any cancer         |
| 49828          | B441.00         | Malignant neoplasm of fallopian tube                          | Any cancer         |
| 101778         | B442.00         | Malignant neoplasm of broad ligament                          | Any cancer         |
| 46153          | B443.00         | Malignant neoplasm of parametrium                             | Any cancer         |
| 97996          | B44y.00         | Malignant neoplasm of other site of uterine adnexa            | Any cancer         |
| 65106          | B44z.00         | Malignant neoplasm of uterine adnexa NOS                      | Any cancer         |
| 4555           | B45..00         | Malig neop of other and unspecified female genital organs     | Any cancer         |
| 37328          | B450.00         | Malignant neoplasm of vagina                                  | Any cancer         |
| 10698          | B450100         | Malignant neoplasm of vaginal vault                           | Any cancer         |
| 60772          | B450z00         | Malignant neoplasm of vagina NOS                              | Any cancer         |
| 43761          | B451.00         | Malignant neoplasm of labia majora                            | Any cancer         |
| 47899          | B451000         | Malignant neoplasm of greater vestibular (Bartholin's) gland  | Any cancer         |



| <b>Medcode</b> | <b>Readcode</b> | <b>Description</b>                                           | <b>Cancer type</b> |
|----------------|-----------------|--------------------------------------------------------------|--------------------|
| 59362          | B451z00         | Malignant neoplasm of labia majora NOS                       | Any cancer         |
| 58061          | B452.00         | Malignant neoplasm of labia minora                           | Any cancer         |
| 53910          | B453.00         | Malignant neoplasm of clitoris                               | Any cancer         |
| 4554           | B454.00         | Malignant neoplasm of vulva unspecified                      | Any cancer         |
| 11991          | B454.11         | Primary vulval cancer                                        | Any cancer         |
| 26454          | B45X.00         | Malignant neoplasm/overlapping lesion/feml genital organs    | Any cancer         |
| 95421          | B45y.00         | Malignant neoplasm of other specified female genital organ   | Any cancer         |
| 27617          | B45y000         | Malignant neoplasm of overlapping lesion of vulva            | Any cancer         |
| 20166          | B45z.00         | Malignant neoplasm of female genital organ NOS               | Any cancer         |
| 3279           | B831.00         | Carcinoma in situ of cervix uteri                            | Any cancer         |
| 4087           | B831.11         | CIN III-carcinoma in situ of cervix                          | Any cancer         |
| 5295           | B831.12         | Cervical intraepithelial neoplasia                           | Any cancer         |
| 21886          | B831.13         | Cervical intraepithelial neoplasia grade III                 | Any cancer         |
| 24228          | B831000         | Carcinoma in situ of endocervix                              | Any cancer         |
| 50126          | B831100         | Carcinoma in situ of exocervix                               | Any cancer         |
| 29898          | B832.00         | Carcinoma in situ of other and unspecified parts of uterus   | Any cancer         |
| 61803          | B832.11         | Carcinoma in situ of body of uterus                          | Any cancer         |
| 7904           | B832000         | Carcinoma in situ of endometrium                             | Any cancer         |
| 44915          | B833.00         | Carcinoma in situ other and unspecified female genital organ | Any cancer         |
| 17137          | B833000         | Carcinoma in situ of ovary                                   | Any cancer         |
| 59499          | B833100         | Carcinoma in situ of fallopian tube                          | Any cancer         |
| 34946          | B833200         | Carcinoma in situ of vagina                                  | Any cancer         |
| 12119          | B833300         | Carcinoma in situ of vulva                                   | Any cancer         |
| 3281           | B833311         | Vulval intraepithelial neoplasia                             | Any cancer         |
| 40598          | Byu7.00         | [X]Malignant neoplasm of female genital organs               | Any cancer         |
| 64497          | Byu7000         | [X]Malignant neoplasm of uterine adnexa, unspecified         | Any cancer         |
| 57756          | Byu7100         | [X]Malignant neoplasm/other specified female genital organs  | Any cancer         |
| 55588          | Byu7300         | [X]Malignant neoplasm of female genital organ, unspecified   | Any cancer         |
| 72695          | ByuFA00         | [X]Carcinoma in situ of other parts of cervix                | Any cancer         |
| 8918           | B15..00         | Malignant neoplasm of liver and intrahepatic bile ducts      | Any cancer         |
| 25535          | B150.00         | Primary malignant neoplasm of liver                          | Any cancer         |
| 16126          | B150000         | Primary carcinoma of liver                                   | Any cancer         |
| 31210          | B150100         | Hepatoblastoma of liver                                      | Any cancer         |
| 68410          | B150200         | Primary angiosarcoma of liver                                | Any cancer         |
| 22187          | B150300         | Hepatocellular carcinoma                                     | Any cancer         |
| 44399          | B150z00         | Primary malignant neoplasm of liver NOS                      | Any cancer         |
| 16915          | B151.00         | Malignant neoplasm of intrahepatic bile ducts                | Any cancer         |
| 65124          | B151000         | Malignant neoplasm of interlobular bile ducts                | Any cancer         |
| 89593          | B151200         | Malignant neoplasm of intrahepatic biliary passages          | Any cancer         |
| 58088          | B151400         | Malignant neoplasm of intrahepatic gall duct                 | Any cancer         |
| 61643          | B151z00         | Malignant neoplasm of intrahepatic bile ducts NOS            | Any cancer         |
| 26393          | B152.00         | Malignant neoplasm of liver unspecified                      | Any cancer         |
| 36147          | B153.00         | Secondary malignant neoplasm of liver                        | Any cancer         |
| 38978          | B15z.00         | Malignant neoplasm of liver and intrahepatic bile ducts NOS  | Any cancer         |
| 54103          | B16..00         | Malignant neoplasm gallbladder and extrahepatic bile ducts   | Any cancer         |
| 16105          | B160.00         | Malignant neoplasm of gallbladder                            | Any cancer         |

| <b>Medcode</b> | <b>Readcode</b> | <b>Description</b>                                          | <b>Cancer type</b> |
|----------------|-----------------|-------------------------------------------------------------|--------------------|
| 31393          | B160.11         | Carcinoma gallbladder                                       | Any cancer         |
| 23433          | B161.00         | Malignant neoplasm of extrahepatic bile ducts               | Any cancer         |
| 72445          | B161000         | Malignant neoplasm of cystic duct                           | Any cancer         |
| 52537          | B161100         | Malignant neoplasm of hepatic duct                          | Any cancer         |
| 7982           | B161200         | Malignant neoplasm of common bile duct                      | Any cancer         |
| 36495          | B161211         | Carcinoma common bile duct                                  | Any cancer         |
| 105613         | B161300         | Malignant neoplasm of sphincter of Oddi                     | Any cancer         |
| 74896          | B161z00         | Malignant neoplasm of extrahepatic bile ducts NOS           | Any cancer         |
| 10949          | B162.00         | Malignant neoplasm of ampulla of Vater                      | Any cancer         |
| 35039          | B163.00         | Malignant neoplasm, overlapping lesion of biliary tract     | Any cancer         |
| 60312          | B16y.00         | Malignant neoplasm other gallbladder/extrahepatic bile duct | Any cancer         |
| 15907          | B16z.00         | Malignant neoplasm gallbladder/extrahepatic bile ducts NOS  | Any cancer         |
| 8166           | B17..00         | Malignant neoplasm of pancreas                              | Any cancer         |
| 8771           | B170.00         | Malignant neoplasm of head of pancreas                      | Any cancer         |
| 40810          | B171.00         | Malignant neoplasm of body of pancreas                      | Any cancer         |
| 39870          | B172.00         | Malignant neoplasm of tail of pancreas                      | Any cancer         |
| 35535          | B173.00         | Malignant neoplasm of pancreatic duct                       | Any cancer         |
| 35795          | B174.00         | Malignant neoplasm of Islets of Langerhans                  | Any cancer         |
| 97875          | B175.00         | Malignant neoplasm, overlapping lesion of pancreas          | Any cancer         |
| 109782         | B176.00         | Somatostatinoma of pancreas                                 | Any cancer         |
| 48537          | B17y.00         | Malignant neoplasm of other specified sites of pancreas     | Any cancer         |
| 96635          | B17y000         | Malignant neoplasm of ectopic pancreatic tissue             | Any cancer         |
| 95783          | B17yz00         | Malignant neoplasm of specified site of pancreas NOS        | Any cancer         |
| 34388          | B17z.00         | Malignant neoplasm of pancreas NOS                          | Any cancer         |
| 66673          | B808.00         | Carcinoma in situ of liver and biliary system               | Any cancer         |
| 51934          | B808.11         | Carcinoma in situ of biliary system                         | Any cancer         |
| 25310          | B808000         | Carcinoma in situ of liver                                  | Any cancer         |
| 99580          | B808100         | Carcinoma in situ of intrahepatic bile ducts                | Any cancer         |
| 37501          | B808200         | Carcinoma in situ of hepatic duct                           | Any cancer         |
| 46594          | B808300         | Carcinoma in situ of gall bladder                           | Any cancer         |
| 73164          | B808400         | Carcinoma in situ of cystic duct                            | Any cancer         |
| 64089          | B808500         | Carcinoma in situ of common bile duct                       | Any cancer         |
| 21792          | B808600         | Carcinoma in situ of ampulla of Vater                       | Any cancer         |
| 98540          | B808z00         | Carcinoma in situ of liver or biliary system NOS            | Any cancer         |
| 44166          | B80z.00         | Carcinoma in situ of other and unspecified digestive organs | Any cancer         |
| 16931          | B80z000         | Carcinoma in situ of pancreas                               | Any cancer         |
| 43490          | Byu1100         | [X]Other specified carcinomas of liver                      | Any cancer         |
| 15148          | B47..00         | Malignant neoplasm of testis                                | Any cancer         |
| 64602          | B470.00         | Malignant neoplasm of undescended testis                    | Any cancer         |
| 7740           | B470200         | Seminoma of undescended testis                              | Any cancer         |
| 36325          | B470300         | Teratoma of undescended testis                              | Any cancer         |
| 96429          | B470z00         | Malignant neoplasm of undescended testis NOS                | Any cancer         |
| 19475          | B471.00         | Malignant neoplasm of descended testis                      | Any cancer         |
| 21786          | B471000         | Seminoma of descended testis                                | Any cancer         |
| 9476           | B471100         | Teratoma of descended testis                                | Any cancer         |
| 91509          | B471z00         | Malignant neoplasm of descended testis NOS                  | Any cancer         |

| <b>Medcode</b> | <b>Readcode</b> | <b>Description</b>                                           | <b>Cancer type</b> |
|----------------|-----------------|--------------------------------------------------------------|--------------------|
| 38510          | B47z.00         | Malignant neoplasm of testis NOS                             | Any cancer         |
| 2961           | B47z.11         | Seminoma of testis                                           | Any cancer         |
| 15989          | B47z.12         | Teratoma of testis                                           | Any cancer         |
| 3541           | B48..00         | Malignant neoplasm of penis and other male genital organs    | Any cancer         |
| 50681          | B480.00         | Malignant neoplasm of prepuce (foreskin)                     | Any cancer         |
| 17841          | B481.00         | Malignant neoplasm of glans penis                            | Any cancer         |
| 48743          | B482.00         | Malignant neoplasm of body of penis                          | Any cancer         |
| 43392          | B483.00         | Malignant neoplasm of penis, part unspecified                | Any cancer         |
| 72127          | B484.00         | Malignant neoplasm of epididymis                             | Any cancer         |
| 63331          | B485.00         | Malignant neoplasm of spermatic cord                         | Any cancer         |
| 47767          | B486.00         | Malignant neoplasm of scrotum                                | Any cancer         |
| 52570          | B487.00         | Malignant neoplasm, overlapping lesion of penis              | Any cancer         |
| 67949          | B48y.00         | Malignant neoplasm of other male genital organ               | Any cancer         |
| 68161          | B48y000         | Malignant neoplasm of seminal vesicle                        | Any cancer         |
| 47668          | B48y100         | Malignant neoplasm of tunica vaginalis                       | Any cancer         |
| 68824          | B48y200         | Malignant neoplasm, overlapping lesion male genital orgs     | Any cancer         |
| 92329          | B48yz00         | Malignant neoplasm of other male genital organ NOS           | Any cancer         |
| 63224          | B48z.00         | Malignant neoplasm of penis and other male genital organ NOS | Any cancer         |
| 27311          | B835.00         | Carcinoma in situ of penis                                   | Any cancer         |
| 107958         | B836.00         | Carcinoma in situ other and unspecified male genital organs  | Any cancer         |
| 8177           | B836000         | Carcinoma in situ of testis                                  | Any cancer         |
| 58879          | B836300         | Carcinoma in situ of scrotum                                 | Any cancer         |
| 109831         | B836z00         | Carcinoma in situ of male genital organs NOS                 | Any cancer         |
| 7187           | B837.00         | Carcinoma in situ of bladder                                 | Any cancer         |
| 68358          | B83z.00         | Carcinoma in situ of urinary organs NOS                      | Any cancer         |
| 40671          | Byu8.00         | [X]Malignant neoplasm of male genital organs                 | Any cancer         |
| 57191          | Byu8000         | [X]Malignant neoplasm/other specified male genital organs    | Any cancer         |
| 45262          | Byu8200         | [X]Malignant neoplasm of male genital organ, unspecified     | Any cancer         |
| 106003         | ByuFC00         | [X]Carcinoma in situ of oth+unspecified male genital organs  | Any cancer         |
| 19415          | B0...00         | Malignant neoplasm of lip, oral cavity and pharynx           | Any cancer         |
| 24374          | B0...11         | Carcinoma of lip, oral cavity and pharynx                    | Any cancer         |
| 14712          | B00..00         | Malignant neoplasm of lip                                    | Any cancer         |
| 9984           | B00..11         | Carcinoma of lip                                             | Any cancer         |
| 73962          | B000.00         | Malignant neoplasm of upper lip, vermilion border            | Any cancer         |
| 66270          | B000000         | Malignant neoplasm of upper lip, external                    | Any cancer         |
| 50296          | B000100         | Malignant neoplasm of upper lip, lipstick area               | Any cancer         |
| 98740          | B000z00         | Malignant neoplasm of upper lip, vermilion border NOS        | Any cancer         |
| 67446          | B001.00         | Malignant neoplasm of lower lip, vermilion border            | Any cancer         |
| 66384          | B001000         | Malignant neoplasm of lower lip, external                    | Any cancer         |
| 95480          | B001100         | Malignant neoplasm of lower lip, lipstick area               | Any cancer         |
| 101707         | B001z00         | Malignant neoplasm of lower lip, vermilion border NOS        | Any cancer         |
| 99493          | B002.00         | Malignant neoplasm of upper lip, inner aspect                | Any cancer         |
| 99001          | B002100         | Malignant neoplasm of upper lip, frenulum                    | Any cancer         |
| 98500          | B002200         | Malignant neoplasm of upper lip, mucosa                      | Any cancer         |
| 90610          | B002300         | Malignant neoplasm of upper lip, oral aspect                 | Any cancer         |
| 100721         | B002z00         | Malignant neoplasm of upper lip, inner aspect NOS            | Any cancer         |

| <b>Medcode</b> | <b>Readcode</b> | <b>Description</b>                                           | <b>Cancer type</b> |
|----------------|-----------------|--------------------------------------------------------------|--------------------|
| 71147          | B003.00         | Malignant neoplasm of lower lip, inner aspect                | Any cancer         |
| 67504          | B003000         | Malignant neoplasm of lower lip, buccal aspect               | Any cancer         |
| 91843          | B003100         | Malignant neoplasm of lower lip, frenulum                    | Any cancer         |
| 89909          | B003200         | Malignant neoplasm of lower lip, mucosa                      | Any cancer         |
| 94441          | B003300         | Malignant neoplasm of lower lip, oral aspect                 | Any cancer         |
| 96782          | B003z00         | Malignant neoplasm of lower lip, inner aspect NOS            | Any cancer         |
| 61692          | B004.00         | Malignant neoplasm of lip unspecified, inner aspect          | Any cancer         |
| 73614          | B004000         | Malignant neoplasm of lip unspecified, buccal aspect         | Any cancer         |
| 68399          | B004200         | Malignant neoplasm of lip unspecified, mucosa                | Any cancer         |
| 100144         | B004300         | Malignant neoplasm of lip, oral aspect                       | Any cancer         |
| 96783          | B005.00         | Malignant neoplasm of commissure of lip                      | Any cancer         |
| 18882          | B006.00         | Malignant neoplasm of overlapping lesion of lip              | Any cancer         |
| 37553          | B007.00         | Malignant neoplasm of lip, unspecified                       | Any cancer         |
| 100906         | B00z000         | Malignant neoplasm of lip, unspecified, external             | Any cancer         |
| 94251          | B00z100         | Malignant neoplasm of lip, unspecified, lipstick area        | Any cancer         |
| 69761          | B00zz00         | Malignant neoplasm of lip, vermilion border NOS              | Any cancer         |
| 10283          | B01..00         | Malignant neoplasm of tongue                                 | Any cancer         |
| 43431          | B010.00         | Malignant neoplasm of base of tongue                         | Any cancer         |
| 69671          | B010.11         | Malignant neoplasm of posterior third of tongue              | Any cancer         |
| 34409          | B010000         | Malignant neoplasm of base of tongue dorsal surface          | Any cancer         |
| 91035          | B010z00         | Malignant neoplasm of fixed part of tongue NOS               | Any cancer         |
| 43642          | B011.00         | Malignant neoplasm of dorsal surface of tongue               | Any cancer         |
| 107258         | B011100         | Malignant neoplasm of midline of tongue                      | Any cancer         |
| 43781          | B011z00         | Malignant neoplasm of dorsum of tongue NOS                   | Any cancer         |
| 36161          | B012.00         | Malignant neoplasm of tongue, tip and lateral border         | Any cancer         |
| 62840          | B013.00         | Malignant neoplasm of ventral surface of tongue              | Any cancer         |
| 102142         | B013000         | Malignant neoplasm of anterior 2/3 of tongue ventral surface | Any cancer         |
| 63979          | B013100         | Malignant neoplasm of frenulum linguae                       | Any cancer         |
| 38488          | B013z00         | Malignant neoplasm of ventral tongue surface NOS             | Any cancer         |
| 58121          | B014.00         | Malignant neoplasm of anterior 2/3 of tongue unspecified     | Any cancer         |
| 37096          | B015.00         | Malignant neoplasm of tongue, junctional zone                | Any cancer         |
| 24852          | B016.00         | Malignant neoplasm of lingual tonsil                         | Any cancer         |
| 47205          | B017.00         | Malignant overlapping lesion of tongue                       | Any cancer         |
| 41530          | B01y.00         | Malignant neoplasm of other sites of tongue                  | Any cancer         |
| 40557          | B01z.00         | Malignant neoplasm of tongue NOS                             | Any cancer         |
| 20292          | B02..00         | Malignant neoplasm of major salivary glands                  | Any cancer         |
| 4388           | B020.00         | Malignant neoplasm of parotid gland                          | Any cancer         |
| 51786          | B021.00         | Malignant neoplasm of submandibular gland                    | Any cancer         |
| 70928          | B022.00         | Malignant neoplasm of sublingual gland                       | Any cancer         |
| 70696          | B02y.00         | Malignant neoplasm of other major salivary glands            | Any cancer         |
| 50475          | B02z.00         | Malignant neoplasm of major salivary gland NOS               | Any cancer         |
| 43400          | B03..00         | Malignant neoplasm of gum                                    | Any cancer         |
| 32024          | B030.00         | Malignant neoplasm of upper gum                              | Any cancer         |
| 49360          | B031.00         | Malignant neoplasm of lower gum                              | Any cancer         |
| 101753         | B03y.00         | Malignant neoplasm of other sites of gum                     | Any cancer         |
| 93218          | B03z.00         | Malignant neoplasm of gum NOS                                | Any cancer         |

| <b>Medcode</b> | <b>Readcode</b> | <b>Description</b>                                         | <b>Cancer type</b> |
|----------------|-----------------|------------------------------------------------------------|--------------------|
| 20092          | B04..00         | Malignant neoplasm of floor of mouth                       | Any cancer         |
| 45408          | B040.00         | Malignant neoplasm of anterior portion of floor of mouth   | Any cancer         |
| 45986          | B041.00         | Malignant neoplasm of lateral portion of floor of mouth    | Any cancer         |
| 17912          | B042.00         | Malignant neoplasm, overlapping lesion of floor of mouth   | Any cancer         |
| 56709          | B04y.00         | Malignant neoplasm of other sites of floor of mouth        | Any cancer         |
| 36716          | B04z.00         | Malignant neoplasm of floor of mouth NOS                   | Any cancer         |
| 14792          | B05..00         | Malignant neoplasm of other and unspecified parts of mouth | Any cancer         |
| 31364          | B050.00         | Malignant neoplasm of cheek mucosa                         | Any cancer         |
| 30402          | B050.11         | Malignant neoplasm of buccal mucosa                        | Any cancer         |
| 103796         | B051.00         | Malignant neoplasm of vestibule of mouth                   | Any cancer         |
| 95772          | B051000         | Malignant neoplasm of upper buccal sulcus                  | Any cancer         |
| 97530          | B051100         | Malignant neoplasm of lower buccal sulcus                  | Any cancer         |
| 37590          | B052.00         | Malignant neoplasm of hard palate                          | Any cancer         |
| 40292          | B053.00         | Malignant neoplasm of soft palate                          | Any cancer         |
| 37516          | B054.00         | Malignant neoplasm of uvula                                | Any cancer         |
| 70819          | B055.00         | Malignant neoplasm of palate unspecified                   | Any cancer         |
| 96003          | B055000         | Malignant neoplasm of junction of hard and soft palate     | Any cancer         |
| 69951          | B055100         | Malignant neoplasm of roof of mouth                        | Any cancer         |
| 28559          | B055z00         | Malignant neoplasm of palate NOS                           | Any cancer         |
| 37724          | B056.00         | Malignant neoplasm of retromolar area                      | Any cancer         |
| 10314          | B057.00         | Overlapping lesion of other and unspecified parts of mouth | Any cancer         |
| 37916          | B05y.00         | Malignant neoplasm of other specified mouth parts          | Any cancer         |
| 55015          | B05z.00         | Malignant neoplasm of mouth NOS                            | Any cancer         |
| 37549          | B05z000         | Kaposi's sarcoma of palate                                 | Any cancer         |
| 22893          | B06..00         | Malignant neoplasm of oropharynx                           | Any cancer         |
| 16241          | B060.00         | Malignant neoplasm of tonsil                               | Any cancer         |
| 26448          | B060000         | Malignant neoplasm of faucial tonsil                       | Any cancer         |
| 101988         | B060100         | Malignant neoplasm of palatine tonsil                      | Any cancer         |
| 102151         | B060200         | Malignant neoplasm of overlapping lesion of tonsil         | Any cancer         |
| 53884          | B060z00         | Malignant neoplasm tonsil NOS                              | Any cancer         |
| 24397          | B061.00         | Malignant neoplasm of tonsillar fossa                      | Any cancer         |
| 55066          | B062.00         | Malignant neoplasm of tonsillar pillar                     | Any cancer         |
| 51926          | B062000         | Malignant neoplasm of faucial pillar                       | Any cancer         |
| 99185          | B062100         | Malignant neoplasm of glossopalatine fold                  | Any cancer         |
| 61510          | B062200         | Malignant neoplasm of palatoglossal arch                   | Any cancer         |
| 93842          | B062300         | Malignant neoplasm of palatopharyngeal arch                | Any cancer         |
| 100002         | B062z00         | Malignant neoplasm of tonsillar fossa NOS                  | Any cancer         |
| 39554          | B063.00         | Malignant neoplasm of vallecula                            | Any cancer         |
| 46728          | B064.00         | Malignant neoplasm of anterior epiglottis                  | Any cancer         |
| 26134          | B064000         | Malignant neoplasm of epiglottis, free border              | Any cancer         |
| 91895          | B064100         | Malignant neoplasm of glossoepiglottic fold                | Any cancer         |
| 73439          | B064z00         | Malignant neoplasm of anterior epiglottis NOS              | Any cancer         |
| 48519          | B065.00         | Malignant neoplasm of junctional region of epiglottis      | Any cancer         |
| 56355          | B066.00         | Malignant neoplasm of lateral wall of oropharynx           | Any cancer         |
| 90124          | B067.00         | Malignant neoplasm of posterior wall of oropharynx         | Any cancer         |
| 67323          | B06y.00         | Malignant neoplasm of oropharynx, other specified sites    | Any cancer         |

| <b>Medcode</b> | <b>Readcode</b> | <b>Description</b>                                           | <b>Cancer type</b> |
|----------------|-----------------|--------------------------------------------------------------|--------------------|
| 91037          | B06yz00         | Malignant neoplasm of other specified site of oropharynx NOS | Any cancer         |
| 43200          | B06z.00         | Malignant neoplasm of oropharynx NOS                         | Any cancer         |
| 24675          | B07..00         | Malignant neoplasm of nasopharynx                            | Any cancer         |
| 94390          | B070.00         | Malignant neoplasm of roof of nasopharynx                    | Any cancer         |
| 95429          | B071.00         | Malignant neoplasm of posterior wall of nasopharynx          | Any cancer         |
| 33388          | B071000         | Malignant neoplasm of adenoid                                | Any cancer         |
| 46548          | B071100         | Malignant neoplasm of pharyngeal tonsil                      | Any cancer         |
| 96869          | B071z00         | Malignant neoplasm of posterior wall of nasopharynx NOS      | Any cancer         |
| 59004          | B072.00         | Malignant neoplasm of lateral wall of nasopharynx            | Any cancer         |
| 37940          | B072000         | Malignant neoplasm of pharyngeal recess                      | Any cancer         |
| 102205         | B072z00         | Malignant neoplasm of lateral wall of nasopharynx NOS        | Any cancer         |
| 44139          | B073.00         | Malignant neoplasm of anterior wall of nasopharynx           | Any cancer         |
| 106915         | B073100         | Malignant neoplasm of nasopharyngeal soft palate surface     | Any cancer         |
| 99386          | B073200         | Malignant neoplasm posterior margin nasal septum and choanae | Any cancer         |
| 100918         | B073z00         | Malignant neoplasm of anterior wall of nasopharynx NOS       | Any cancer         |
| 66422          | B074.00         | Malignant neoplasm, overlapping lesion of nasopharynx        | Any cancer         |
| 55630          | B07y.00         | Malignant neoplasm of other specified site of nasopharynx    | Any cancer         |
| 28665          | B07z.00         | Malignant neoplasm of nasopharynx NOS                        | Any cancer         |
| 34012          | B08..00         | Malignant neoplasm of hypopharynx                            | Any cancer         |
| 43548          | B080.00         | Malignant neoplasm of postcricoid region                     | Any cancer         |
| 39897          | B081.00         | Malignant neoplasm of pyriform sinus                         | Any cancer         |
| 57248          | B082.00         | Malignant neoplasm aryepiglottic fold, hypopharyngeal aspect | Any cancer         |
| 64462          | B083.00         | Malignant neoplasm of posterior pharynx                      | Any cancer         |
| 88362          | B08y.00         | Malignant neoplasm of other specified hypopharyngeal site    | Any cancer         |
| 28451          | B08z.00         | Malignant neoplasm of hypopharynx NOS                        | Any cancer         |
| 46114          | B0z..00         | Malig neop other/ill-defined sites lip, oral cavity, pharynx | Any cancer         |
| 16297          | B0z0.00         | Malignant neoplasm of pharynx unspecified                    | Any cancer         |
| 95016          | B0z1.00         | Malignant neoplasm of Waldeyer's ring                        | Any cancer         |
| 39084          | B0z2.00         | Malignant neoplasm of laryngopharynx                         | Any cancer         |
| 49758          | B0zy.00         | Malignant neoplasm of other sites lip, oral cavity, pharynx  | Any cancer         |
| 39430          | B0zz.00         | Malignant neoplasm of lip, oral cavity and pharynx NOS       | Any cancer         |
| 23389          | B200.00         | Malignant neoplasm of nasal cavities                         | Any cancer         |
| 71204          | B200000         | Malignant neoplasm of cartilage of nose                      | Any cancer         |
| 98911          | B200100         | Malignant neoplasm of nasal conchae                          | Any cancer         |
| 62761          | B200200         | Malignant neoplasm of septum of nose                         | Any cancer         |
| 62182          | B200300         | Malignant neoplasm of vestibule of nose                      | Any cancer         |
| 42856          | B200z00         | Malignant neoplasm of nasal cavities NOS                     | Any cancer         |
| 24456          | B201.00         | Malig neop auditory tube, middle ear and mastoid air cells   | Any cancer         |
| 107916         | B201000         | Malignant neoplasm of auditory (Eustachian) tube             | Any cancer         |
| 98537          | B201100         | Malignant neoplasm of tympanic cavity                        | Any cancer         |
| 54613          | B201200         | Malignant neoplasm of tympanic antrum                        | Any cancer         |
| 71946          | B201300         | Malignant neoplasm of mastoid air cells                      | Any cancer         |
| 73537          | B201z00         | Malig neop auditory tube, middle ear, mastoid air cells NOS  | Any cancer         |
| 32174          | B202.00         | Malignant neoplasm of maxillary sinus                        | Any cancer         |
| 54636          | B203.00         | Malignant neoplasm of ethmoid sinus                          | Any cancer         |
| 15684          | B204.00         | Malignant neoplasm of frontal sinus                          | Any cancer         |

| <b>Medcode</b> | <b>Readcode</b> | <b>Description</b>                                          | <b>Cancer type</b> |
|----------------|-----------------|-------------------------------------------------------------|--------------------|
| 65215          | B205.00         | Malignant neoplasm of sphenoidal sinus                      | Any cancer         |
| 39590          | B206.00         | Malignant neoplasm, overlapping lesion of accessory sinuses | Any cancer         |
| 96971          | B20y.00         | Malig neop other site nasal cavity, middle ear and sinuses  | Any cancer         |
| 55246          | B20z.00         | Malignant neoplasm of accessory sinus NOS                   | Any cancer         |
| 95390          | B800.00         | Carcinoma in situ of lip, oral cavity and pharynx           | Any cancer         |
| 37505          | B800.11         | Carcinoma in situ of oral cavity                            | Any cancer         |
| 42129          | B800.12         | Carcinoma in situ of pharynx                                | Any cancer         |
| 47737          | B800000         | Carcinoma in situ of lip                                    | Any cancer         |
| 27944          | B800100         | Carcinoma in situ of tongue                                 | Any cancer         |
| 50288          | B800200         | Carcinoma in situ of salivary glands                        | Any cancer         |
| 57866          | B800300         | Carcinoma in situ of gums                                   | Any cancer         |
| 24801          | B800400         | Carcinoma in situ of floor of mouth                         | Any cancer         |
| 34823          | B800500         | Carcinoma in situ of cheek                                  | Any cancer         |
| 30966          | B800600         | Carcinoma in situ of palate                                 | Any cancer         |
| 36104          | B800700         | Carcinoma in situ of nasopharynx                            | Any cancer         |
| 50419          | B800800         | Carcinoma in situ of oropharynx                             | Any cancer         |
| 44663          | B800900         | Carcinoma in situ of hypopharynx                            | Any cancer         |
| 37187          | B800z00         | Carcinoma in situ of lip, oral cavity and pharynx NOS       | Any cancer         |
| 58973          | Byu0.00         | [X]Malignant neoplasm of lip, oral cavity and pharynx       | Any cancer         |
| 102314         | 1427000         | H/O: prostate cancer                                        | Any cancer         |
| 780            | B46..00         | Malignant neoplasm of prostate                              | Any cancer         |
| 6328           | B834.00         | Carcinoma in situ of prostate                               | Any cancer         |
| 54599          | B834000         | High grade prostatic intraepithelial neoplasia              | Any cancer         |
| 105236         | B834100         | Prostatic intraepithelial neoplasia                         | Any cancer         |
| 37306          | ZV10415         | [V]Personal history of malignant neoplasm of prostate       | Any cancer         |
| 319            | B21..00         | Malignant neoplasm of larynx                                | Any cancer         |
| 318            | B210.00         | Malignant neoplasm of glottis                               | Any cancer         |
| 26165          | B211.00         | Malignant neoplasm of supraglottis                          | Any cancer         |
| 22441          | B212.00         | Malignant neoplasm of subglottis                            | Any cancer         |
| 43111          | B213.00         | Malignant neoplasm of laryngeal cartilage                   | Any cancer         |
| 63460          | B213000         | Malignant neoplasm of arytenoid cartilage                   | Any cancer         |
| 37805          | B213100         | Malignant neoplasm of cricoid cartilage                     | Any cancer         |
| 107878         | B213200         | Malignant neoplasm of cuneiform cartilage                   | Any cancer         |
| 47862          | B213300         | Malignant neoplasm of thyroid cartilage                     | Any cancer         |
| 97332          | B213z00         | Malignant neoplasm of laryngeal cartilage NOS               | Any cancer         |
| 50579          | B214.00         | Malignant neoplasm, overlapping lesion of larynx            | Any cancer         |
| 55374          | B215.00         | Malignant neoplasm of epiglottis NOS                        | Any cancer         |
| 26813          | B21y.00         | Malignant neoplasm of larynx, other specified site          | Any cancer         |
| 9237           | B21z.00         | Malignant neoplasm of larynx NOS                            | Any cancer         |
| 13243          | B22..00         | Malignant neoplasm of trachea, bronchus and lung            | Any cancer         |
| 15221          | B220.00         | Malignant neoplasm of trachea                               | Any cancer         |
| 103946         | B220100         | Malignant neoplasm of mucosa of trachea                     | Any cancer         |
| 37810          | B220z00         | Malignant neoplasm of trachea NOS                           | Any cancer         |
| 12870          | B221.00         | Malignant neoplasm of main bronchus                         | Any cancer         |
| 17391          | B221000         | Malignant neoplasm of carina of bronchus                    | Any cancer         |
| 33444          | B221100         | Malignant neoplasm of hilus of lung                         | Any cancer         |

| <b>Medcode</b> | <b>Readcode</b> | <b>Description</b>                                           | <b>Cancer type</b> |
|----------------|-----------------|--------------------------------------------------------------|--------------------|
| 21698          | B221z00         | Malignant neoplasm of main bronchus NOS                      | Any cancer         |
| 10358          | B222.00         | Malignant neoplasm of upper lobe, bronchus or lung           | Any cancer         |
| 20170          | B222.11         | Pancoast's syndrome                                          | Any cancer         |
| 31700          | B222000         | Malignant neoplasm of upper lobe bronchus                    | Any cancer         |
| 25886          | B222100         | Malignant neoplasm of upper lobe of lung                     | Any cancer         |
| 44169          | B222z00         | Malignant neoplasm of upper lobe, bronchus or lung NOS       | Any cancer         |
| 31268          | B223.00         | Malignant neoplasm of middle lobe, bronchus or lung          | Any cancer         |
| 41523          | B223000         | Malignant neoplasm of middle lobe bronchus                   | Any cancer         |
| 39923          | B223100         | Malignant neoplasm of middle lobe of lung                    | Any cancer         |
| 54134          | B223z00         | Malignant neoplasm of middle lobe, bronchus or lung NOS      | Any cancer         |
| 31188          | B224.00         | Malignant neoplasm of lower lobe, bronchus or lung           | Any cancer         |
| 18678          | B224000         | Malignant neoplasm of lower lobe bronchus                    | Any cancer         |
| 12582          | B224100         | Malignant neoplasm of lower lobe of lung                     | Any cancer         |
| 42566          | B224z00         | Malignant neoplasm of lower lobe, bronchus or lung NOS       | Any cancer         |
| 36371          | B225.00         | Malignant neoplasm of overlapping lesion of bronchus & lung  | Any cancer         |
| 7484           | B226.00         | Mesothelioma                                                 | Any cancer         |
| 38961          | B22y.00         | Malignant neoplasm of other sites of bronchus or lung        | Any cancer         |
| 3903           | B22z.00         | Malignant neoplasm of bronchus or lung NOS                   | Any cancer         |
| 2587           | B22z.11         | Lung cancer                                                  | Any cancer         |
| 31573          | B23..00         | Malignant neoplasm of pleura                                 | Any cancer         |
| 67107          | B230.00         | Malignant neoplasm of parietal pleura                        | Any cancer         |
| 106194         | B231.00         | Malignant neoplasm of visceral pleura                        | Any cancer         |
| 9600           | B232.00         | Mesothelioma of pleura                                       | Any cancer         |
| 98104          | B23y.00         | Malignant neoplasm of other specified pleura                 | Any cancer         |
| 34742          | B23z.00         | Malignant neoplasm of pleura NOS                             | Any cancer         |
| 64050          | B81..00         | Carcinoma in situ of respiratory system                      | Any cancer         |
| 11403          | B810.00         | Carcinoma in situ of larynx                                  | Any cancer         |
| 35772          | B810000         | Carcinoma in situ of thyroid cartilage                       | Any cancer         |
| 36948          | B810100         | Carcinoma in situ of cricoid cartilage                       | Any cancer         |
| 53460          | B810200         | Carcinoma in situ of epiglottis                              | Any cancer         |
| 65953          | B810300         | Carcinoma in situ of arytenoid cartilage                     | Any cancer         |
| 31860          | B810600         | Carcinoma in situ of aryepiglottic fold                      | Any cancer         |
| 73076          | B810700         | Carcinoma in situ of vestibular fold                         | Any cancer         |
| 7697           | B810800         | Carcinoma in situ of vocal fold-glottis                      | Any cancer         |
| 10375          | B810811         | Carcinoma in situ of glottis                                 | Any cancer         |
| 53882          | B810z00         | Carcinoma in situ of larynx NOS                              | Any cancer         |
| 51714          | B811.00         | Carcinoma in situ of trachea                                 | Any cancer         |
| 9267           | B812.00         | Carcinoma in situ of bronchus and lung                       | Any cancer         |
| 49159          | B812000         | Carcinoma in situ of carina of bronchus                      | Any cancer         |
| 35058          | B812100         | Carcinoma in situ of main bronchus                           | Any cancer         |
| 37579          | B812200         | Carcinoma in situ of upper lobe bronchus and lung            | Any cancer         |
| 47897          | B812300         | Carcinoma in situ of middle lobe bronchus and lung           | Any cancer         |
| 52373          | B812400         | Carcinoma in situ of lower lobe bronchus and lung            | Any cancer         |
| 25372          | B812z00         | Carcinoma in situ of bronchus or lung NOS                    | Any cancer         |
| 97954          | B81y.00         | Carcinoma in situ of other specified part respiratory system | Any cancer         |
| 59426          | B81y.11         | Carcinoma in situ of nasal sinuses                           | Any cancer         |



| <b>Medcode</b> | <b>Readcode</b> | <b>Description</b>                                              | <b>Cancer type</b> |
|----------------|-----------------|-----------------------------------------------------------------|--------------------|
| 46497          | B81y000         | Carcinoma in situ of pleura                                     | Any cancer         |
| 95559          | B81yz00         | Carcinoma in situ of specified parts respiratory system NOS     | Any cancer         |
| 62610          | B81z.00         | Carcinoma in situ of respiratory organ NOS                      | Any cancer         |
| 35325          | Byu2.00         | [X]Malignant neoplasm of respiratory and intrathoracic organ    | Any cancer         |
| 40595          | Byu2000         | [X]Malignant neoplasm of bronchus or lung, unspecified          | Any cancer         |
| 21715          | Byu5011         | [X]Mesothelioma of lung                                         | Any cancer         |
| 100781         | ByuF300         | [X]Carcinoma in situ of other parts of respiratory system       | Any cancer         |
| 4632           | B33..00         | Other malignant neoplasm of skin                                | Any cancer         |
| 876            | B33..11         | Basal cell carcinoma                                            | Any cancer         |
| 5034           | B33..12         | Epithelioma                                                     | Any cancer         |
| 1940           | B33..13         | Rodent ulcer                                                    | Any cancer         |
| 37016          | B33..14         | Malignant neoplasm of sebaceous gland                           | Any cancer         |
| 40443          | B33..15         | Malignant neoplasm of sweat gland                               | Any cancer         |
| 3445           | B33..16         | Epithelioma basal cell                                          | Any cancer         |
| 18245          | B330.00         | Malignant neoplasm of skin of lip                               | Any cancer         |
| 43087          | B331.00         | Malignant neoplasm of eyelid including canthus                  | Any cancer         |
| 36731          | B331000         | Malignant neoplasm of canthus                                   | Any cancer         |
| 55550          | B331100         | Malignant neoplasm of upper eyelid                              | Any cancer         |
| 41958          | B331200         | Malignant neoplasm of lower eyelid                              | Any cancer         |
| 53515          | B332.00         | Malignant neoplasm skin of ear and external auricular canal     | Any cancer         |
| 33997          | B332000         | Malignant neoplasm of skin of auricle (ear)                     | Any cancer         |
| 62080          | B332100         | Malignant neoplasm of skin of external auditory meatus          | Any cancer         |
| 33271          | B332200         | Malignant neoplasm of pinna NEC                                 | Any cancer         |
| 62399          | B332z00         | Malignant neoplasm skin of ear and external auricular canal NOS | Any cancer         |
| 27370          | B333.00         | Malignant neoplasm skin of other and unspecified parts face     | Any cancer         |
| 30645          | B333000         | Malignant neoplasm of skin of cheek, external                   | Any cancer         |
| 49403          | B333100         | Malignant neoplasm of skin of chin                              | Any cancer         |
| 55670          | B333200         | Malignant neoplasm of skin of eyebrow                           | Any cancer         |
| 30576          | B333300         | Malignant neoplasm of skin of forehead                          | Any cancer         |
| 16202          | B333400         | Malignant neoplasm of skin of nose (external)                   | Any cancer         |
| 21327          | B333500         | Malignant neoplasm of skin of temple                            | Any cancer         |
| 46008          | B333z00         | Malignant neoplasm skin other and unspec part of face NOS       | Any cancer         |
| 54234          | B334.00         | Malignant neoplasm of scalp and skin of neck                    | Any cancer         |
| 37165          | B334000         | Malignant neoplasm of scalp                                     | Any cancer         |
| 43619          | B334100         | Malignant neoplasm of skin of neck                              | Any cancer         |
| 73760          | B334z00         | Malignant neoplasm of scalp or skin of neck NOS                 | Any cancer         |
| 57446          | B335.00         | Malignant neoplasm of skin of trunk, excluding scrotum          | Any cancer         |
| 70380          | B335000         | Malignant neoplasm of skin of axillary fold                     | Any cancer         |
| 37969          | B335100         | Malignant neoplasm of skin of chest, excluding breast           | Any cancer         |
| 30543          | B335200         | Malignant neoplasm of skin of breast                            | Any cancer         |
| 18618          | B335300         | Malignant neoplasm of skin of abdominal wall                    | Any cancer         |
| 67748          | B335400         | Malignant neoplasm of skin of umbilicus                         | Any cancer         |
| 66319          | B335500         | Malignant neoplasm of skin of groin                             | Any cancer         |
| 46458          | B335600         | Malignant neoplasm of skin of perineum                          | Any cancer         |
| 45077          | B335700         | Malignant neoplasm of skin of back                              | Any cancer         |
| 62305          | B335800         | Malignant neoplasm of skin of buttock                           | Any cancer         |

| <b>Medcode</b> | <b>Readcode</b> | <b>Description</b>                                          | <b>Cancer type</b> |
|----------------|-----------------|-------------------------------------------------------------|--------------------|
| 23480          | B335900         | Malignant neoplasm of perianal skin                         | Any cancer         |
| 66447          | B335A00         | Malignant neoplasm of skin of scapular region               | Any cancer         |
| 15868          | B335z00         | Malignant neoplasm of skin of trunk, excluding scrotum, NOS | Any cancer         |
| 30747          | B336.00         | Malignant neoplasm of skin of upper limb and shoulder       | Any cancer         |
| 43122          | B336000         | Malignant neoplasm of skin of shoulder                      | Any cancer         |
| 42707          | B336100         | Malignant neoplasm of skin of upper arm                     | Any cancer         |
| 30577          | B336200         | Malignant neoplasm of skin of fore-arm                      | Any cancer         |
| 54352          | B336300         | Malignant neoplasm of skin of hand                          | Any cancer         |
| 25245          | B336400         | Malignant neoplasm of skin of finger                        | Any cancer         |
| 64406          | B336500         | Malignant neoplasm of skin of thumb                         | Any cancer         |
| 60526          | B336z00         | Malignant neoplasm of skin of upper limb or shoulder NOS    | Any cancer         |
| 57442          | B337.00         | Malignant neoplasm of skin of lower limb and hip            | Any cancer         |
| 70988          | B337000         | Malignant neoplasm of skin of hip                           | Any cancer         |
| 58601          | B337100         | Malignant neoplasm of skin of thigh                         | Any cancer         |
| 56954          | B337200         | Malignant neoplasm of skin of knee                          | Any cancer         |
| 68197          | B337300         | Malignant neoplasm of skin of popliteal fossa area          | Any cancer         |
| 33682          | B337400         | Malignant neoplasm of skin of lower leg                     | Any cancer         |
| 64270          | B337500         | Malignant neoplasm of skin of ankle                         | Any cancer         |
| 104025         | B337600         | Malignant neoplasm of skin of heel                          | Any cancer         |
| 70587          | B337700         | Malignant neoplasm of skin of foot                          | Any cancer         |
| 65782          | B337800         | Malignant neoplasm of skin of toe                           | Any cancer         |
| 67914          | B337900         | Malignant neoplasm of skin of great toe                     | Any cancer         |
| 61194          | B337z00         | Malignant neoplasm of skin of lower limb or hip NOS         | Any cancer         |
| 93352          | B338.00         | Squamous cell carcinoma of skin                             | Any cancer         |
| 24375          | B339.00         | Dermatofibrosarcoma protuberans                             | Any cancer         |
| 42429          | B33X.00         | Malignant neoplasm overlapping lesion of skin               | Any cancer         |
| 18354          | B33y.00         | Malignant neoplasm of other specified skin sites            | Any cancer         |
| 2492           | B33z.00         | Malignant neoplasm of skin NOS                              | Any cancer         |
| 93490          | B33z.11         | Squamous cell carcinoma of skin NOS                         | Any cancer         |
| 12084          | B82..00         | Carcinoma in situ of skin                                   | Any cancer         |
| 63957          | B820.00         | Carcinoma in situ of skin of lip                            | Any cancer         |
| 57550          | B821.00         | Carcinoma in situ of skin of eyelid including canthus       | Any cancer         |
| 50189          | B822.00         | Carcinoma in situ skin of ear and external auricular canal  | Any cancer         |
| 32249          | B822.11         | Carcinoma in situ of ear                                    | Any cancer         |
| 59614          | B822000         | Carcinoma in situ of skin of auricle                        | Any cancer         |
| 70295          | B822z00         | Carcinoma in situ skin of ear/external auricular canal NOS  | Any cancer         |
| 49254          | B823.00         | Carcinoma in situ of skin of other parts of face            | Any cancer         |
| 47789          | B823000         | Carcinoma in situ of skin of forehead skin                  | Any cancer         |
| 69720          | B823100         | Carcinoma in situ of skin of eyebrow                        | Any cancer         |
| 61103          | B823300         | Carcinoma in situ of skin of cheek                          | Any cancer         |
| 3135           | B823400         | Carcinoma in situ of skin of nose                           | Any cancer         |
| 31511          | B823500         | Carcinoma in situ of skin of temple                         | Any cancer         |
| 65222          | B823600         | Carcinoma in situ of skin of jaw                            | Any cancer         |
| 110614         | B823z00         | Carcinoma in situ of skin of other parts of face NOS        | Any cancer         |
| 69345          | B824.00         | Carcinoma in situ of scalp and skin of neck                 | Any cancer         |
| 19665          | B824000         | Carcinoma in situ of scalp                                  | Any cancer         |

| <b>Medcode</b> | <b>Readcode</b> | <b>Description</b>                                        | <b>Cancer type</b> |
|----------------|-----------------|-----------------------------------------------------------|--------------------|
| 54140          | B824100         | Carcinoma in situ of skin of neck                         | Any cancer         |
| 52328          | B825.00         | Carcinoma in situ of skin of trunk, excluding scrotum     | Any cancer         |
| 8647           | B825000         | Carcinoma in situ of skin of breast                       | Any cancer         |
| 62939          | B825100         | Carcinoma in situ of skin of chest wall NOS               | Any cancer         |
| 39390          | B825200         | Carcinoma in situ of skin of axilla                       | Any cancer         |
| 38032          | B825300         | Carcinoma in situ of skin of back                         | Any cancer         |
| 42212          | B825400         | Carcinoma in situ of skin of abdominal wall               | Any cancer         |
| 57358          | B825500         | Carcinoma in situ of skin of groin                        | Any cancer         |
| 38777          | B825600         | Carcinoma in situ of skin of perineum                     | Any cancer         |
| 61321          | B825700         | Carcinoma in situ of skin of buttock                      | Any cancer         |
| 56374          | B825800         | Carcinoma in situ of perianal skin                        | Any cancer         |
| 60563          | B825z00         | Carcinoma in situ of skin of trunk NOS                    | Any cancer         |
| 46568          | B826.00         | Carcinoma in situ of skin of upper limb and shoulder      | Any cancer         |
| 56554          | B826000         | Carcinoma in situ of skin of shoulder                     | Any cancer         |
| 57284          | B826100         | Carcinoma in situ of skin of upper arm                    | Any cancer         |
| 54790          | B826200         | Carcinoma in situ of skin of lower arm                    | Any cancer         |
| 49358          | B826300         | Carcinoma in situ of skin of hand                         | Any cancer         |
| 90339          | B826z00         | Carcinoma in situ of skin of upper limb or shoulder NOS   | Any cancer         |
| 14815          | B827.00         | Carcinoma in situ of skin of lower limb and hip           | Any cancer         |
| 708            | B827.11         | Carcinoma in situ of skin of leg                          | Any cancer         |
| 71655          | B827000         | Carcinoma in situ of skin of hip                          | Any cancer         |
| 46469          | B827100         | Carcinoma in situ of skin of thigh                        | Any cancer         |
| 69601          | B827200         | Carcinoma in situ of skin of knee                         | Any cancer         |
| 27542          | B827300         | Carcinoma in situ of skin of lower leg                    | Any cancer         |
| 67755          | B827400         | Carcinoma in situ of skin of foot                         | Any cancer         |
| 64630          | B827z00         | Carcinoma in situ of skin of lower limb or hip NOS        | Any cancer         |
| 779            | B49..00         | Malignant neoplasm of urinary bladder                     | Any cancer         |
| 38862          | B490.00         | Malignant neoplasm of trigone of urinary bladder          | Any cancer         |
| 44996          | B491.00         | Malignant neoplasm of dome of urinary bladder             | Any cancer         |
| 35963          | B492.00         | Malignant neoplasm of lateral wall of urinary bladder     | Any cancer         |
| 19162          | B493.00         | Malignant neoplasm of anterior wall of urinary bladder    | Any cancer         |
| 42012          | B494.00         | Malignant neoplasm of posterior wall of urinary bladder   | Any cancer         |
| 41571          | B495.00         | Malignant neoplasm of bladder neck                        | Any cancer         |
| 28241          | B496.00         | Malignant neoplasm of ureteric orifice                    | Any cancer         |
| 42023          | B497.00         | Malignant neoplasm of urachus                             | Any cancer         |
| 105388         | B498.00         | Local recurrence of malignant tumour of urinary bladder   | Any cancer         |
| 36949          | B49y.00         | Malignant neoplasm of other site of urinary bladder       | Any cancer         |
| 47801          | B49y000         | Malignant neoplasm, overlapping lesion of bladder         | Any cancer         |
| 31102          | B49z.00         | Malignant neoplasm of urinary bladder NOS                 | Any cancer         |
| 13559          | B4A..00         | Malig neop of kidney and other unspecified urinary organs | Any cancer         |
| 18712          | B4A..11         | Renal malignant neoplasm                                  | Any cancer         |
| 1599           | B4A0.00         | Malignant neoplasm of kidney parenchyma                   | Any cancer         |
| 7978           | B4A0000         | Hypernephroma                                             | Any cancer         |
| 12389          | B4A1.00         | Malignant neoplasm of renal pelvis                        | Any cancer         |
| 27540          | B4A1000         | Malignant neoplasm of renal calyces                       | Any cancer         |
| 101608         | B4A1100         | Malignant neoplasm of ureteropelvic junction              | Any cancer         |

| <b>Medcode</b> | <b>Readcode</b> | <b>Description</b>                                         | <b>Cancer type</b> |
|----------------|-----------------|------------------------------------------------------------|--------------------|
| 54184          | B4A1z00         | Malignant neoplasm of renal pelvis NOS                     | Any cancer         |
| 15223          | B4A2.00         | Malignant neoplasm of ureter                               | Any cancer         |
| 15644          | B4A3.00         | Malignant neoplasm of urethra                              | Any cancer         |
| 72174          | B4A4.00         | Malignant neoplasm of paraurethral glands                  | Any cancer         |
| 44884          | B4Ay.00         | Malignant neoplasm of other urinary organs                 | Any cancer         |
| 59286          | B4Ay000         | Malignant neoplasm of overlapping lesion of urinary organs | Any cancer         |
| 29462          | B4Az.00         | Malignant neoplasm of kidney or urinary organs NOS         | Any cancer         |
| 38931          | B4y..00         | Malignant neoplasm of genitourinary organ OS               | Any cancer         |
| 52594          | B4z..00         | Malignant neoplasm of genitourinary organ NOS              | Any cancer         |
| 35113          | Byu9.00         | [X]Malignant neoplasm of urinary tract                     | Any cancer         |
| 45260          | Byu9000         | [X]Malignant neoplasm of urinary organ, unspecified        | Any cancer         |
| 865            | B32..00         | Malignant melanoma of skin                                 | Any cancer         |
| 70637          | B320.00         | Malignant melanoma of lip                                  | Any cancer         |
| 54632          | B321.00         | Malignant melanoma of eyelid including canthus             | Any cancer         |
| 57260          | B322.00         | Malignant melanoma of ear and external auricular canal     | Any cancer         |
| 59061          | B322000         | Malignant melanoma of auricle (ear)                        | Any cancer         |
| 102145         | B322100         | Malignant melanoma of external auditory meatus             | Any cancer         |
| 73744          | B322z00         | Malignant melanoma of ear and external auricular canal NOS | Any cancer         |
| 47252          | B323.00         | Malignant melanoma of other and unspecified parts of face  | Any cancer         |
| 41278          | B323000         | Malignant melanoma of external surface of cheek            | Any cancer         |
| 71136          | B323100         | Malignant melanoma of chin                                 | Any cancer         |
| 47094          | B323200         | Malignant melanoma of eyebrow                              | Any cancer         |
| 68133          | B323300         | Malignant melanoma of forehead                             | Any cancer         |
| 45139          | B323400         | Malignant melanoma of external surface of nose             | Any cancer         |
| 58958          | B323500         | Malignant melanoma of temple                               | Any cancer         |
| 67806          | B323z00         | Malignant melanoma of face NOS                             | Any cancer         |
| 65625          | B324.00         | Malignant melanoma of scalp and neck                       | Any cancer         |
| 55881          | B324000         | Malignant melanoma of scalp                                | Any cancer         |
| 45306          | B324100         | Malignant melanoma of neck                                 | Any cancer         |
| 99257          | B324z00         | Malignant melanoma of scalp and neck NOS                   | Any cancer         |
| 38689          | B325.00         | Malignant melanoma of trunk (excluding scrotum)            | Any cancer         |
| 49814          | B325000         | Malignant melanoma of axilla                               | Any cancer         |
| 32768          | B325100         | Malignant melanoma of breast                               | Any cancer         |
| 53629          | B325200         | Malignant melanoma of buttock                              | Any cancer         |
| 34259          | B325300         | Malignant melanoma of groin                                | Any cancer         |
| 109002         | B325400         | Malignant melanoma of perianal skin                        | Any cancer         |
| 95629          | B325500         | Malignant melanoma of perineum                             | Any cancer         |
| 43715          | B325600         | Malignant melanoma of umbilicus                            | Any cancer         |
| 43463          | B325700         | Malignant melanoma of back                                 | Any cancer         |
| 51209          | B325800         | Malignant melanoma of chest wall                           | Any cancer         |
| 45760          | B325z00         | Malignant melanoma of trunk, excluding scrotum, NOS        | Any cancer         |
| 65164          | B326.00         | Malignant melanoma of upper limb and shoulder              | Any cancer         |
| 50505          | B326000         | Malignant melanoma of shoulder                             | Any cancer         |
| 54685          | B326100         | Malignant melanoma of upper arm                            | Any cancer         |
| 45755          | B326200         | Malignant melanoma of fore-arm                             | Any cancer         |
| 62475          | B326300         | Malignant melanoma of hand                                 | Any cancer         |

| <b>Medcode</b> | <b>Readcode</b> | <b>Description</b>                                          | <b>Cancer type</b> |
|----------------|-----------------|-------------------------------------------------------------|--------------------|
| 25602          | B326400         | Malignant melanoma of finger                                | Any cancer         |
| 63997          | B326500         | Malignant melanoma of thumb                                 | Any cancer         |
| 55292          | B326z00         | Malignant melanoma of upper limb or shoulder NOS            | Any cancer         |
| 46255          | B327.00         | Malignant melanoma of lower limb and hip                    | Any cancer         |
| 73536          | B327000         | Malignant melanoma of hip                                   | Any cancer         |
| 51873          | B327100         | Malignant melanoma of thigh                                 | Any cancer         |
| 54305          | B327200         | Malignant melanoma of knee                                  | Any cancer         |
| 39878          | B327300         | Malignant melanoma of popliteal fossa area                  | Any cancer         |
| 37872          | B327400         | Malignant melanoma of lower leg                             | Any cancer         |
| 42714          | B327500         | Malignant melanoma of ankle                                 | Any cancer         |
| 61246          | B327600         | Malignant melanoma of heel                                  | Any cancer         |
| 41490          | B327700         | Malignant melanoma of foot                                  | Any cancer         |
| 36899          | B327800         | Malignant melanoma of toe                                   | Any cancer         |
| 53369          | B327900         | Malignant melanoma of great toe                             | Any cancer         |
| 64327          | B327z00         | Malignant melanoma of lower limb or hip NOS                 | Any cancer         |
| 42153          | B32y.00         | Malignant melanoma of other specified skin site             | Any cancer         |
| 96585          | B32y000         | Overlapping malignant melanoma of skin                      | Any cancer         |
| 28556          | B32z.00         | Malignant melanoma of skin NOS                              | Any cancer         |
| 19686          | B828.00         | Melanoma in situ of skin                                    | Any cancer         |
| 46536          | B828000         | Melanoma in situ of lip                                     | Any cancer         |
| 37108          | B828100         | Melanoma in situ of eyelid, including canthus               | Any cancer         |
| 72032          | B828200         | Melanoma in situ of ear and external auricular canal        | Any cancer         |
| 97858          | B828300         | Melanoma in situ of scalp and neck                          | Any cancer         |
| 59768          | B828400         | Melanoma in situ of trunk                                   | Any cancer         |
| 56694          | B828500         | Melanoma in situ of upper limb, including shoulder          | Any cancer         |
| 47850          | B828600         | Melanoma in situ of lower limb, including hip               | Any cancer         |
| 49572          | B828700         | Melanoma in situ of scalp                                   | Any cancer         |
| 52332          | B828800         | Melanoma in situ of back of hand                            | Any cancer         |
| 71044          | B828900         | Melanoma in situ of back                                    | Any cancer         |
| 54246          | B828W00         | Melanoma in situ, unspecified                               | Any cancer         |
| 61989          | B828X00         | Melanoma in situ of other and unspecified parts of face     | Any cancer         |
| 56925          | Byu4000         | [X]Malignant melanoma of other+unspecified parts of face    | Any cancer         |
| 19444          | Byu4100         | [X]Malignant melanoma of skin, unspecified                  | Any cancer         |
| 97628          | ByuF600         | [X]Melanoma in situ of other sites                          | Any cancer         |
| 73261          | ByuFF00         | [X]Melanoma in situ, unspecified                            | Any cancer         |
| 87335          | B624.12         | Hairy cell leukaemia                                        | Any cancer         |
| 37182          | B63..00         | Multiple myeloma and immunoproliferative neoplasms          | Any cancer         |
| 4944           | B630.00         | Multiple myeloma                                            | Any cancer         |
| 43552          | B630.11         | Kahler's disease                                            | Any cancer         |
| 15211          | B630.12         | Myelomatosis                                                | Any cancer         |
| 22158          | B630000         | Malignant plasma cell neoplasm, extramedullary plasmacytoma | Any cancer         |
| 19028          | B630100         | Solitary myeloma                                            | Any cancer         |
| 21329          | B630200         | Plasmacytoma NOS                                            | Any cancer         |
| 46042          | B630300         | Lambda light chain myeloma                                  | Any cancer         |
| 104418         | B630400         | Solitary plasmacytoma                                       | Any cancer         |
| 39187          | B631.00         | Plasma cell leukaemia                                       | Any cancer         |

| <b>Medcode</b> | <b>Readcode</b> | <b>Description</b>                                   | <b>Cancer type</b> |
|----------------|-----------------|------------------------------------------------------|--------------------|
| 64567          | B63y.00         | Other immunoproliferative neoplasms                  | Any cancer         |
| 43450          | B63z.00         | Immunoproliferative neoplasm or myeloma NOS          | Any cancer         |
| 19372          | B64..00         | Lymphoid leukaemia                                   | Any cancer         |
| 4222           | B64..11         | Lymphatic leukaemia                                  | Any cancer         |
| 4251           | B640.00         | Acute lymphoid leukaemia                             | Any cancer         |
| 104325         | B640000         | B-cell acute lymphoblastic leukaemia                 | Any cancer         |
| 8625           | B641.00         | Chronic lymphoid leukaemia                           | Any cancer         |
| 27790          | B641.11         | Chronic lymphatic leukaemia                          | Any cancer         |
| 104328         | B641000         | B-cell chronic lymphocytic leukaemia                 | Any cancer         |
| 107017         | B641011         | Chronic lymphocytic leukaemia of B-cell type         | Any cancer         |
| 107052         | B641100         | Clinical stage A chronic lymphocytic leukaemia       | Any cancer         |
| 106924         | B641200         | Clinical stage B chronic lymphocytic leukaemia       | Any cancer         |
| 107163         | B641300         | Clinical stage C chronic lymphocytic leukaemia       | Any cancer         |
| 72774          | B642.00         | Subacute lymphoid leukaemia                          | Any cancer         |
| 49725          | B64y.00         | Other lymphoid leukaemia                             | Any cancer         |
| 31586          | B64y100         | Prolymphocytic leukaemia                             | Any cancer         |
| 37461          | B64y200         | Adult T-cell leukaemia                               | Any cancer         |
| 108656         | B64y300         | B-cell prolymphocytic leukaemia                      | Any cancer         |
| 107643         | B64y400         | T-cell prolymphocytic leukaemia                      | Any cancer         |
| 104939         | B64y500         | Adult T-cell lymphoma/leukaemia (HTLV-1-associated)  | Any cancer         |
| 38331          | B64yz00         | Other lymphoid leukaemia NOS                         | Any cancer         |
| 38914          | B64z.00         | Lymphoid leukaemia NOS                               | Any cancer         |
| 7176           | B65..00         | Myeloid leukaemia                                    | Any cancer         |
| 4413           | B650.00         | Acute myeloid leukaemia                              | Any cancer         |
| 10726          | B651.00         | Chronic myeloid leukaemia                            | Any cancer         |
| 31701          | B651.11         | Chronic granulocytic leukaemia                       | Any cancer         |
| 100786         | B651000         | Chronic eosinophilic leukaemia                       | Any cancer         |
| 105957         | B651100         | Chronic myeloid leukaemia, BCR/ABL positive          | Any cancer         |
| 102783         | B651200         | Chronic neutrophilic leukaemia                       | Any cancer         |
| 107236         | B651300         | Atypical chronic myeloid leukaemia, BCR/ABL negative | Any cancer         |
| 27520          | B651z00         | Chronic myeloid leukaemia NOS                        | Any cancer         |
| 63475          | B652.00         | Subacute myeloid leukaemia                           | Any cancer         |
| 70724          | B653.00         | Myeloid sarcoma                                      | Any cancer         |
| 52327          | B653000         | Chloroma                                             | Any cancer         |
| 39629          | B653100         | Granulocytic sarcoma                                 | Any cancer         |
| 104788         | B654.00         | Acute myeloblastic leukaemia                         | Any cancer         |
| 27664          | B65y100         | Acute promyelocytic leukaemia                        | Any cancer         |
| 66089          | B65yz00         | Other myeloid leukaemia NOS                          | Any cancer         |
| 33344          | B65z.00         | Myeloid leukaemia NOS                                | Any cancer         |
| 35875          | B66..00         | Monocytic leukaemia                                  | Any cancer         |
| 108715         | B66..11         | Histiocytic leukaemia                                | Any cancer         |
| 67700          | B66..12         | Monoblastic leukaemia                                | Any cancer         |
| 19974          | B660.00         | Acute monocytic leukaemia                            | Any cancer         |
| 27458          | B661.00         | Chronic monocytic leukaemia                          | Any cancer         |
| 101606         | B662.00         | Subacute monocytic leukaemia                         | Any cancer         |
| 108424         | B663.00         | Acute monoblastic leukaemia                          | Any cancer         |

| <b>Medcode</b> | <b>Readcode</b> | <b>Description</b>                                       | <b>Cancer type</b> |
|----------------|-----------------|----------------------------------------------------------|--------------------|
| 99015          | B66y.00         | Other monocytic leukaemia                                | Any cancer         |
| 103645         | B66yz00         | Other monocytic leukaemia NOS                            | Any cancer         |
| 93342          | B66z.00         | Monocytic leukaemia NOS                                  | Any cancer         |
| 37272          | B67..00         | Other specified leukaemia                                | Any cancer         |
| 42539          | B670.00         | Acute erythraemia and erythroleukaemia                   | Any cancer         |
| 27340          | B670.11         | Di Guglielmo's disease                                   | Any cancer         |
| 37468          | B671.00         | Chronic erythraemia                                      | Any cancer         |
| 63653          | B671.11         | Heilmeyer-Schoner disease                                | Any cancer         |
| 57671          | B672.00         | Megakaryocytic leukaemia                                 | Any cancer         |
| 65777          | B672.11         | Thrombocytic leukaemia                                   | Any cancer         |
| 65721          | B673.00         | Mast cell leukaemia                                      | Any cancer         |
| 50858          | B674.00         | Acute panmyelosis                                        | Any cancer         |
| 28276          | B675.00         | Acute myelofibrosis                                      | Any cancer         |
| 104273         | B677.00         | Myelodysplastic and myeloproliferative disease           | Any cancer         |
| 94174          | B67y.00         | Other and unspecified leukaemia                          | Any cancer         |
| 72197          | B67y000         | Lymphosarcoma cell leukaemia                             | Any cancer         |
| 99413          | B67yz00         | Other and unspecified leukaemia NOS                      | Any cancer         |
| 30632          | B67z.00         | Other specified leukaemia NOS                            | Any cancer         |
| 25191          | B68..00         | Leukaemia of unspecified cell type                       | Any cancer         |
| 4072           | B680.00         | Acute leukaemia NOS                                      | Any cancer         |
| 16416          | B681.00         | Chronic leukaemia NOS                                    | Any cancer         |
| 54793          | B682.00         | Subacute leukaemia NOS                                   | Any cancer         |
| 34692          | B68y.00         | Other leukaemia of unspecified cell type                 | Any cancer         |
| 4250           | B68z.00         | Leukaemia NOS                                            | Any cancer         |
| 20440          | B69..00         | Myelomonocytic leukaemia                                 | Any cancer         |
| 61500          | B690.00         | Acute myelomonocytic leukaemia                           | Any cancer         |
| 22050          | B691.00         | Chronic myelomonocytic leukaemia                         | Any cancer         |
| 104475         | B692.00         | Subacute myelomonocytic leukaemia                        | Any cancer         |
| 105069         | B693.00         | Juvenile myelomonocytic leukaemia                        | Any cancer         |
| 30646          | B6y..00         | Malignant neoplasm lymphatic or haematopoietic tissue OS | Any cancer         |
| 6115           | B6y0.00         | Myeloproliferative disorder                              | Any cancer         |
| 17056          | B6y0.11         | Myeloproliferative disease                               | Any cancer         |
| 39336          | B6y1.00         | Myelosclerosis with myeloid metaplasia                   | Any cancer         |
| 110065         | B6y1.12         | Osteomyelofibrosis                                       | Any cancer         |
| 67029          | ByuD500         | [X]Other lymphoid leukaemia                              | Any cancer         |
| 61693          | ByuD600         | [X]Other myeloid leukaemia                               | Any cancer         |
| 89762          | ByuD700         | [X]Other monocytic leukaemia                             | Any cancer         |
| 89329          | ByuD800         | [X]Other specified leukaemias                            | Any cancer         |
| 65165          | ByuD900         | [X]Other leukaemia of unspecified cell type              | Any cancer         |
