# Supplementary material for: Increasing cancer risk over calendar year in people with multiple sclerosis: a case–control study
Source: Springer Nature journal article supplement (doi:10.1007/s00415-020-10170-5), 2020-10-21
Supplement: MOESM2 [file 18508044]

**Supplementary Table 2** Frequency of cancer specific read codes among MS patients and matched controls after index date

| <b>Cancer type</b>               | <b>MS patients</b> | <b>Matched controls</b> |
|----------------------------------|--------------------|-------------------------|
|                                  | <b>n (%)</b>       | <b>n (%)</b>            |
| Hodgkin lymphoma                 | 2 (0.02)           | 13 (0.03)               |
| Non-Hodgkin lymphoma             | 15 (0.15)          | 64 (0.16)               |
| Leukaemia                        | 11 (0.11)          | 72 (0.18)               |
| Brain cancer                     | 4 (0.039)          | 14 (0.04)               |
| Eye cancer                       | 0 (0)              | 2 (0.01)                |
| Ear-nose-throat cancer           | 5 (0.05)           | 31 (0.08)               |
| Lung and respiratory cancer      | 38 (0.37)          | 211(0.54)               |
| Gastrointestinal cancer          | 45 (0.44)          | 260 (0.66)              |
| Liver and biliopancreatic cancer | 14 (0.13)          | 57 (0.14)               |
| Connective tissue cancer         | 2 (0.02)           | 12 (0.03)               |
| Non melanoma skin cancer         | 115 (1.14)         | 586 (1.5)               |
| Melanoma                         | 11 (0.11)          | 67 (0.17)               |
| Urinary tract cancer             | 22 (0.22)          | 90 (0.23)               |
| Breast cancer                    | 132 (1.83)         | 510 (1.83)              |
| Gynecologic cancer               | 31 (0.43)          | 124 (0.44)              |
| Male genital cancer              | 2 (0.07)           | 10 (0.09)               |
| Prostate cancer                  | 26 (0.9)           | 153 (1.37)              |
