# Supplementary material for: Increasing cancer risk over calendar year in people with multiple sclerosis: a case–control study
Source: Springer Nature journal article supplement (doi:10.1007/s00415-020-10170-5), 2020-10-21
Supplement: MOESM3 [file 18508044]

**Supplementary Table 3** Multivariable Cox regression models testing the association of MS status, age at index date, gender and calendar year at index date with risk of specific types of cancer

| Cancer type                      | Predicting variables        | HR   | 95% CI    | p      |
|----------------------------------|-----------------------------|------|-----------|--------|
| Hodgkin lymphoma                 | MS status (MS)              | 0.64 | 0.15-2.86 | 0.563  |
|                                  | Gender (F)                  | 0.58 | 0.21-1.63 | 0.300  |
|                                  | Age at index date           | 1.01 | 0.97-1.05 | 0.662  |
|                                  | Calendar year at index date | 1.12 | 0.99-1.26 | 0.079  |
| Non-Hodgkin lymphoma             | MS status (MS)              | 1.03 | 0.59-1.81 | 0.911  |
|                                  | Gender (F)                  | 0.66 | 0.42-1.04 | 0.072  |
|                                  | Age at index date           | 1.07 | 1.05-1.09 | <0.001 |
|                                  | Calendar year at index date | 1.04 | 0.99-1.09 | 0.116  |
| Leukaemia                        | MS status (MS)              | 0.69 | 0.37-1.30 | 0.251  |
|                                  | Gender (F)                  | 0.79 | 0.50-1.25 | 0.320  |
|                                  | Age at index date           | 1.08 | 1.06-1.10 | <0.001 |
|                                  | Calendar year at index date | 1.03 | 0.98-1.08 | 0.240  |
| Brain cancer                     | MS status (MS)              | 1.22 | 0.40-3.72 | 0.722  |
|                                  | Gender (F)                  | 1.02 | 0.36-2.86 | 0.972  |
|                                  | Age at index date           | 1.03 | 0.99-1.07 | 0.165  |
|                                  | Calendar year at index date | 1.07 | 0.96-1.19 | 0.202  |
| Eye cancer                       | MS status (MS)              | 0.00 | 0.00-Inf  | 0.999  |
|                                  | Gender (F)                  | 0.39 | 0.03-6.28 | 0.508  |
|                                  | Age at index date           | 1.02 | 0.91-1.15 | 0.693  |
|                                  | Calendar year at index date | 1.09 | 0.76-1.55 | 0.646  |
| Ear-nose-throat cancer           | MS status (MS)              | 0.71 | 0.28-1.82 | 0.474  |
|                                  | Gender (F)                  | 0.29 | 0.15-0.56 | <0.001 |
|                                  | Age at index date           | 1.05 | 1.02-1.08 | <0.001 |
|                                  | Calendar year at index date | 1.00 | 0.93-1.07 | 0.993  |
| Lung and respiratory             | MS status (MS)              | 0.84 | 0.56-1.19 | 0.328  |
|                                  | Gender (F)                  | 0.61 | 0.47-0.78 | <0.001 |
|                                  | Age at index date           | 1.08 | 1.07-1.09 | <0.001 |
|                                  | Calendar year at index date | 0.99 | 0.96-1.01 | 0.348  |
| Gastrointestinal cancer          | MS status (MS)              | 0.80 | 0.59-1.10 | 0.175  |
|                                  | Gender (F)                  | 0.52 | 0.41-0.65 | <0.001 |
|                                  | Age at index date           | 1.08 | 1.07-1.09 | <0.001 |
|                                  | Calendar year at index date | 0.99 | 0.97-1.02 | 0.457  |
| Liver and biliopancreatic cancer | MS status (MS)              | 1.12 | 0.62-2.01 | 0.711  |
|                                  | Gender (F)                  | 1.10 | 0.65-1.86 | 0.729  |
|                                  | Age at index date           | 1.07 | 1.05-1.09 | <0.001 |
|                                  | Calendar year at index date | 1.07 | 1.01-1.13 | 0.017  |
| Connective tissue cancer         | MS status (MS)              | 0.76 | 0.17-3.42 | 0.723  |
|                                  | Gender (F)                  | 0.99 | 0.31-3.16 | 0.986  |

| Cancer type              | Predicting variables        | HR   | 95% CI    | p                |
|--------------------------|-----------------------------|------|-----------|------------------|
| Non melanoma skin cancer | Age at index date           | 1.05 | 1.00-1.10 | <b>0.033</b>     |
|                          | Calendar year at index date | 0.97 | 0.86-1.09 | 0.564            |
|                          | MS status (MS)              | 0.89 | 0.73-1.09 | 0.251            |
|                          | Gender (F)                  | 0.76 | 0.65-0.88 | <b>&lt;0.001</b> |
|                          | Age at index date           | 1.07 | 1.06-1.08 | <b>&lt;0.001</b> |
| Melanoma                 | Calendar year at index date | 1.00 | 0.99-1.02 | 0.891            |
|                          | MS status (MS)              | 0.72 | 0.38-1.36 | 0.305            |
|                          | Gender (F)                  | 1.06 | 0.64-1.76 | 0.815            |
|                          | Age at index date           | 1.03 | 1.01-1.05 | <b>0.003</b>     |
| Urinary tract cancer     | Calendar year at index date | 1.09 | 1.03-1.15 | <b>0.002</b>     |
|                          | MS status (MS)              | 1.14 | 0.72-1.82 | 0.580            |
|                          | Gender (F)                  | 0.33 | 0.23-0.48 | <b>&lt;0.001</b> |
|                          | Age at index date           | 1.08 | 1.06-1.09 | <b>&lt;0.001</b> |
| Breast cancer            | Calendar year at index date | 1.00 | 0.96-1.04 | 0.882            |
|                          | MS status (MS)              | 1.12 | 0.93-1.36 | 0.234            |
|                          | Gender (F)                  | ..   | ..        | ..               |
|                          | Age at index date           | 1.03 | 1.03-1.04 | <b>&lt;0.001</b> |
| Gynecologic cancer       | Calendar year at index date | 1.01 | 1.00-1.03 | 0.108            |
|                          | MS status (MS)              | 1.08 | 0.73-1.60 | 0.701            |
|                          | Gender (F)                  | ..   | ..        | ..               |
|                          | Age at index date           | 1.03 | 1.02-1.05 | <b>&lt;0.001</b> |
| Male genital cancer      | Calendar year at index date | 1.01 | 0.98-1.05 | 0.458            |
|                          | MS status (MS)              | 0.82 | 0.18-3.75 | 0.800            |
|                          | Gender (F)                  | ..   | ..        | ..               |
|                          | Age at index date           | 1.01 | 0.96-1.05 | 0.791            |
| Prostate                 | Calendar year at index date | 1.11 | 0.98-1.26 | 0.102            |
|                          | MS status (MS)              | 0.81 | 0.53-1.22 | 0.311            |
|                          | Gender (F)                  | ..   | ..        | ..               |
|                          | Age at index date           | 1.10 | 1.09-1.12 | <b>&lt;0.001</b> |
|                          | Calendar year at index date | 1.02 | 0.99-1.06 | 0.166            |
